# Supplementary material for: Diabetes and intermediate hyperglycaemia in Kisantu, DR Congo: a cross-sectional prevalence study
Source: PubMed Central journal article supplement — BMJ Open. 2012 Nov 15;2(6):e001911. doi: 10.1136/bmjopen-2012-001911 (PMC3533060; doi:10.1136/bmjopen-2012-001911), 2012-11-15
Supplement: bmjopen-2012-001911.draft_revisions.pdf [file bmjopen-2012-001911.draft_revisions.pdf]

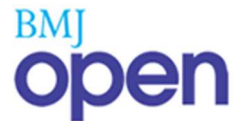

**Prevalence of diabetes and intermediate hyperglycaemia in  
Kisantu, DR Congo**

|                                    |                                                                                                                                                                                                                                                                                                                                                                                                                                                                                                                                                                                                                                                                                                                                                      |
|------------------------------------|------------------------------------------------------------------------------------------------------------------------------------------------------------------------------------------------------------------------------------------------------------------------------------------------------------------------------------------------------------------------------------------------------------------------------------------------------------------------------------------------------------------------------------------------------------------------------------------------------------------------------------------------------------------------------------------------------------------------------------------------------|
| Journal:                           | <i>BMJ Open</i>                                                                                                                                                                                                                                                                                                                                                                                                                                                                                                                                                                                                                                                                                                                                      |
| Manuscript ID:                     | bmjopen-2012-001911                                                                                                                                                                                                                                                                                                                                                                                                                                                                                                                                                                                                                                                                                                                                  |
| Article Type:                      | Research                                                                                                                                                                                                                                                                                                                                                                                                                                                                                                                                                                                                                                                                                                                                             |
| Date Submitted by the Author:      | 02-Aug-2012                                                                                                                                                                                                                                                                                                                                                                                                                                                                                                                                                                                                                                                                                                                                          |
| Complete List of Authors:          | Muyer, Muel; Université de Kinshasa, Centre de Santé Publique<br>Muls, Erik; KULeuven, Endocrinology<br>Mapatano, Mala; Université de Kinshasa, Centre de Santé Publique<br>Makulo, Jean-Robert; Université de Kinshasa, Médecine Interne<br>Mvitu, Moise; Université de Kinshasa, Département des Spécialités<br>Kimenyembo, Wivine; Université de Kinshasa, Département des Spécialités<br>Mandja, Bien-Aimé; Université de Kinshasa, Centre de Santé Publique<br>Kimbondo, Pierre; Hôpital St-Luc, Médecine Interne<br>Bieleli, Chris; Université de Kinshasa, Médecine Interne<br>Kaimbo wa Kaimbo, Dieudonné; Université de Kinshasa, Département des<br>Spécialités<br>Buntinx, Frank; Catholic University of Leuven, Dept of General Practice |
| <b>Primary Subject<br>Heading</b>: | Diabetes and endocrinology                                                                                                                                                                                                                                                                                                                                                                                                                                                                                                                                                                                                                                                                                                                           |
| Secondary Subject Heading:         | Diabetes and endocrinology                                                                                                                                                                                                                                                                                                                                                                                                                                                                                                                                                                                                                                                                                                                           |
| Keywords:                          | General diabetes < DIABETES & ENDOCRINOLOGY, intermediate<br>hyperglycaemia, prevalence, population based survey, sub-Saharan Africa,<br>DR Congo                                                                                                                                                                                                                                                                                                                                                                                                                                                                                                                                                                                                    |
|                                    |                                                                                                                                                                                                                                                                                                                                                                                                                                                                                                                                                                                                                                                                                                                                                      |

SCHOLARONE™  
Manuscripts

1  
2  
3 **Prevalence of diabetes and intermediate hyperglycaemia**  
4 **in Kisantu, DR Congo**  
5 **GEWIJZIGD OF VAN PLAATS VERANDERD**  
6 **NOG TE CORRIGEREN OF AAN TE VULLEN**  
7  
8

9 M.T. Muyer <sup>1</sup>, E. Muls <sup>2</sup>, M.A. Mapatano <sup>1</sup>, R. Makulo <sup>3</sup>, M. Mvitu <sup>4</sup>, W. Kimenyembo<sup>4</sup>,  
10  
11 M. Mandja <sup>1</sup>, P. Kimbondo <sup>5</sup>, E.O. Bieleli <sup>3</sup>, K.W. Kaïmbo <sup>4</sup>, F. Buntinx <sup>6</sup> \*  
12  
13

14  
15 <sup>1</sup> Ecole de Santé Publique, Université de Kinshasa (UNIKIN), Centre National  
16 d'Epidémiologie du Diabète, Democratic Republic of the Congo (DRC)  
17

18 <sup>2</sup> Department of Endocrinology, KULeuven, Leuven, Belgium  
19

20 <sup>3</sup> Département de Médecine Interne, UNIKIN, Cliniques Universitaires, Kinshasa, DRC  
21

22 <sup>4</sup> Département des Spécialités, UNIKIN, Cliniques Universitaires, Service  
23 d'Ophthalmologie, Kinshasa, DRC  
24

25 <sup>5</sup> Service de Médecine Interne, Hôpital St-Luc, Kisantu, DRC  
26  
27

28 <sup>6</sup> Department of General Practice, Catholic University Leuven, Leuven, Belgium and  
29 Research Institute CAPHRI, Maastricht University, Maastricht, The Netherlands  
30  
31

32 \* Corresponding author: Prof. Frank Buntinx. Dept of General Practice, KULeuven,  
33 Kapucijnenvoer 33, blok j, bus 7001, B-3000 Leuven, Belgium  
34 [frank.buntinx@med.kuleuven.be](mailto:frank.buntinx@med.kuleuven.be);  
35 tel +32-(0)16- 337-493 ; fax +32-(0)16- 337-480  
36  
37  
38  
39  
40  
41  
42  
43  
44

45 **Running title:** Diabetes and intermediate hyperglycaemia prevalence in Kisantu, DR  
46 Congo.  
47

48 **Key words:** prevalence, diabetes, intermediate hyperglycaemia, population based survey,  
49 sub-Saharan Africa, DR Congo.  
50

51 Word count : 2992 (body of text); 247 (abstract)  
52 Table : 1  
53 Figure : 1  
54  
55  
56  
57  
58  
59  
60

## Abstract

**Objectives** To study prevalence and risk factors of diabetes mellitus and intermediate hyperglycaemia (IH) in Kisantu, a semi-rural town in Bas-Congo province, DR Congo.

**Design, setting and participants** Cross-sectional population-based survey carried out in 2007 in 1898 subjects aged  $\geq 20$  years. A census preceded the survey. A modified WHO STEPwise strategy was used. Capillary glycaemia was measured for fasting plasma glucose (FPG) and 2-h-post-load glucose. Both WHO/IDF 2006 and ADA 2003 diagnostic criteria for diabetes and IH were used.

**Results** Response rate was 93.7%. Complete data were available in 1759 subjects (86.9%). Crude and standardised (for Doll and UN population) prevalence of diabetes were 4.8% and 4.0-4.2%. Crude IH prevalence was 5.8% (WHO/IDF) and 14.2% (ADA). Independent risk factors for diabetes ( $p < 0.01$ ) were: male gender (OR 2.5), age 50-69 years (OR 2.6), family history (OR 3.5), waist (OR 4.1) and alcohol consumption (OR 0.36). In ROC analysis, prediction of diabetes was slightly better by waist than BMI. IH defined according to WHO/IDF was associated with BMI (OR 2.6,  $P < 0.001$ ). IH defined according to ADA was associated ( $p < 0.05$ ) with waist (OR 1.4), education level (OR 1.6), BMI (OR 2.4) and physical activity (OR 0.7).

**Conclusions** Current prevalence of diabetes in DR Congo exceeds IDF projections for 2030. The lower glucose threshold used by ADA almost triples impaired fasting glucose prevalence compared to WHO/IDF criteria. The high proportion of disorders of glycaemia made up by IH suggests the early stages of a diabetes epidemic.

## ARTICLE SUMMARY

**Article focus:** We studied prevalence of diabetes in a semi-rural town in the democratic Republic of Congo. Such information is yet absent.

### Key-messages

- Crude and standardized prevalence of diabetes were 4;8% and 4.0 (Doll,s population) – 4.2 (UN population).
- Crude prevalence of Intermediate hyperglycaemia was 5.8% (WHO/IDF definition) and 14.2% (ADA definition).
- Risk factors for diabetes were male gender, age, family history, waist, and alcohol consumption

### Strengths and limitations

- We had to cope with absence of census data and trained field workers.
- We had to use (low-cost) capillary blood measures instead of venous samples processed in a laboratory.
- Large group of participants and high participation rate (87%)

### Funding statement

This work was financed by the 2004-2010 ‘Diabetes in DRC’ project of VLIR-UOS (Flemish Interuniversity Council - University Development Cooperation) and supported by the World Diabetes Foundation.

## Abbreviations

ADA, American Diabetes Association; CI, confidence interval; DRC, Democratic Republic of Congo; FPG, fasting plasma glucose; IDF, International Diabetes Federation; IH, intermediate hyperglycaemia; IFG, impaired fasting glucose; IGT, impaired glucose tolerance; NCDs, non-communicable diseases; oGTT, oral glucose tolerance test; SSA, sub-Saharan Africa; UN, United Nations; UNIKIN, Kinshasa University; UOS, University Cooperation Development; VLIR, Vlaamse Interuniversitaire Raad (Flemish Interuniversity Council); WDF, World Diabetes Foundation; WHO, World Health Organization

## INTRODUCTION

Sub-Saharan Africa (SSA) has a disproportionate burden of both infectious and chronic diseases [1]. The epidemic of non-communicable diseases (NCDs) is rising. Diabetes, an important component of NCDs, has been proposed as a tracer of the other burgeoning chronic diseases because it is well defined, fairly easy to diagnose and common [2].

The estimated worldwide prevalence of diabetes among adults was 285 million (6.4%) in 2010, and is predicted to rise to around 438 million (7.7%) by 2030 [3-4]. For SSA the number is expected to rise with 98% from 12 million (3.8%) in 2010 to 24 million (4.7%) in 2030. Increases are expected to be largest in developing countries because of population ageing and urbanisation [5].

Information on epidemiology of diabetes in SSA has increased recently, but is still limited [1-3,5]. High-quality epidemiological studies are difficult to perform in SSA, as they are expensive and labour intensive and populations are often mobile and poorly enumerated [6]. International Diabetes Federation (IDF) estimates for many SSA countries are therefore based on extrapolations from distant and probably dissimilar countries and populations. This is also the case for the Democratic Republic of Congo (DRC), where current IDF estimates are derived from two studies in Tanzania, that were published in 1989 and 2000 and that used now outdated diagnostic criteria [3,7-8]. IDF estimates of national DRC diabetes prevalence of 2.6% in adults, and of 7.4% for impaired glucose tolerance (IGT) should therefore be interpreted with caution.

1  
2  
3 So far, data on diabetes prevalence in SSA according to current diagnostic criteria are  
4 scanty. Few studies have evaluated simultaneously the prevalence of diabetes mellitus  
5 and intermediate hyperglycaemia (IH) [5,9], and no study has compared current ADA  
6 and WHO/IDF criteria for impaired fasting glucose (IFG).  
7  
8  
9

10  
11 The aim of this study is to estimate prevalence rates of diabetes and IH and to determine  
12 their main risk factors in the semi-rural environment of Kisantu, Bas-Congo province,  
13  
14  
15  
16  
17  
18  
19  
20  
21  
22  
23  
24  
25  
26  
27  
28  
29  
30  
31  
32  
33  
34  
35  
36  
37  
38  
39  
40  
41  
42  
43  
44  
45  
46  
47  
48  
49  
50  
51  
52  
53  
54  
55  
56  
57  
58  
59  
60

DRC.

## METHODS

A cross-sectional household survey was conducted in 2007. It was approved by the ethical committee of Kinshasa University (UNIKIN), and informed consent was obtained from all subjects. Design and methods were described in detail previously [10].

### Location

The study was carried out in the four health care areas of Kisantu, a town in Bas-Congo province with approximately 131,000 inhabitants [11]. The principal ethnic group is Bakongo (Bantu), mainly the Bantandu subgroup. Farming is the main economic activity.

### Study population and sampling procedures

All Congolese people aged 20 or more and living in Kisantu were eligible. Pregnant women and people with serious psychiatric disorders were excluded. The sampling process was implemented in two steps: constitution of the sampling frame preceded actual sampling of subjects. The required sample size was calculated to be 2025 participants [10]. Census of inhabited compounds was performed. Sampling in each area was proportionate to its population [11]. Given the sampling frame in each area and the intended sample size, a systematic random sample of households was drawn. Sampling was carried out in four stages. All avenues were included, and a systematic (1/2 or 1/3) random sample of compounds was drawn. In each compound one household was selected randomly. One eligible individual per household was randomly selected. Subjects were asked to come fasting the following morning to the study site. In case of no-show, the interviewer returned the following day. In case of refusal, another individual was selected. The study was preceded by interviewer training, an intensive awareness



1  
2  
3 campaign, and a pilot test in the neighboring city of Madimba, that was not included in  
4  
5 the survey.  
6  
7

### 8 9 **Study procedures**

10  
11 Five fixed sites were used for data collection. Subjects went through seven stations  
12 (registration; biochemistry; interview; anthropometry and monofilament; visual acuity  
13 and blood pressure; intraocular pressure and retina; results). Capillary glycaemia was  
14 measured on the first day in subjects having fasted for  $\geq 8$  h with a Glucocard X-Meter  
15 (Menarini Diagnostics), that produces a read out as plasma glucose. On the second day,  
16 2-hour post-load (75 g glucose; oGTT) glycaemia was measured in subjects who had  
17 fasting plasma glucose (FPG) 100-125 mg/dl (5.6-6.9 mmol/l) on day one, and a second  
18 FPG was obtained from subjects with FPG 126-199 mg/dl (7.0-11.1 mmol/l) on the first  
19 day.  
20  
21

22  
23 In agreement with WHO guidance, we used low technology devices for measuring  
24 glycaemia. With the Glucocard X device, there is no influence of hematocrite on glucose  
25 values within the normoglycemia range, which is important in screening situations as  
26 during our study. Testing showed that reproducibility is good, the device is robust, easy  
27 to use and without need of extensive training.  
28  
29  
30  
31  
32  
33  
34  
35  
36  
37  
38  
39  
40  
41  
42  
43  
44  
45  
46  
47

### 48 **Diagnostic criteria**

49  
50 ADA 2003 [12] and WHO/IDF 2006 criteria [13] were used to define new cases of  
51 diabetes: FPG  $\geq 7.0$  mmol/l, which was confirmed by repeat testing unless unequivocal  
52 hyperglycaemia (FPG  $\geq 11.1$  mmol/l) was present; or 2-hour plasma glucose  $\geq 11.1$   
53 mmol/l during oGTT. Impaired glucose tolerance (IGT) was defined as FPG  $< 7.0$   
54  
55  
56  
57  
58  
59  
60

1  
2  
3 mmol/l, and 2-hour plasma glucose  $\geq 7.8$  and  $< 11.1$  mmol/l during oGTT. Impaired  
4  
5 fasting glucose (IFG) was defined as FPG 6.1-6.9 mmol/l, and 2-hour plasma glucose  $<$   
6  
7 7.8 mmol/l during oGTT; or as subjects in whom a provisional diagnosis of diabetes  
8  
9 based on an initial FPG 7.0-11.1 mmol/l was not confirmed on repeat testing (second  
10  
11 FPG 6.1-6.9 mmol/l). ADA 2003 diagnostic criteria for IFG (FPG 5.6-6.9 mmol/l) were  
12  
13 used in a secondary analysis. Intermediate hyperglycaemia (IH) refers to subjects with  
14  
15 IGT and/or IFG.  
16  
17  
18  
19

20  
21 Hypertension was defined as average of two blood pressure measurements  $\geq 140/90$  mm  
22  
23 Hg [10], obesity as BMI  $\geq 30$  kg/m<sup>2</sup> and abdominal obesity as waist circumference  $\geq 94$   
24  
25 cm in men and  $\geq 80$  cm in women [14]. Sedentary lifestyle was defined with respect to  
26  
27 occupation [10]. Family history of diabetes mellitus was defined as diabetes in first-  
28  
29 degree relatives. Alcohol consumption was classified as current consumption or not;  
30  
31 marital status as cohabiting or living alone; ethnic origin as Bantandu, other Bakongo or  
32  
33 others.  
34  
35  
36  
37

### 38 **Analyses**

39  
40 Non-responders and responders were compared, as were subjects with complete data and  
41  
42 those who were invited but absent on the second day. Continuous data were expressed as  
43  
44 averages  $\pm$  SD and categorized data as percentages with 95% CI. Comparisons were  
45  
46 made with student t-test, chi-square and ANOVA. A test was considered significant when  
47  
48  $P < 0.05$ . Crude and age-standardised prevalence for subjects aged  $\geq 20$  years were  
49  
50 calculated using both the standard population of Doll et al. and UN 2008 population  
51  
52 database projections [15-16]. Analyses were stratified by gender. SPSS 16 was used.  
53  
54  
55  
56  
57  
58  
59  
60

1  
2  
3 To study risk factors associated with diabetes and IH, backward stepwise multivariate  
4  
5 logistic regression analyses were used. Family history of diabetes, age by group (<50, 50-  
6  
7 69 ≥ 70 years), gender, marital status, ethnic origin, level of education, physical activity,  
8  
9 alcohol consumption, and either obesity or abdominal obesity, and all interactions with  
10  
11 family history were included in the initial model. ROC analysis compared performance of  
12  
13 BMI and waist size to predict diabetes risk.  
14  
15  
16  
17  
18  
19  
20  
21  
22  
23  
24  
25  
26  
27  
28  
29  
30  
31  
32  
33  
34  
35  
36  
37  
38  
39  
40  
41  
42  
43  
44  
45  
46  
47  
48  
49  
50  
51  
52  
53  
54  
55  
56  
57  
58  
59  
60

## RESULTS

### Study population

The sample consisted of 2025 selected subjects. Response rate was 93.7% (1898/2025). Complete data were available in 1759 subjects (86.9%), as 2 subjects were aged < 20 years, FPG was not available in 30 subjects on day one, and 107 did not repeat tests on day two (Figure 1).

### Characteristics of participants

Average age of 1759 subjects with complete data was  $51.5 \pm 16.4$  years, and 960 (54.6%) were aged > 50 years. Women represented 64.1% (n=1128;  $P < 0.001$ ) of subjects. Mean BMI and waist circumference were  $21.7 \pm 4.6$  kg/m<sup>2</sup> and  $79.1 \pm 12.7$  cm, respectively. Both BMI and waist size were higher in women ( $P < 0.001$  for both; Table 1). Obesity was found in 6.4%, and more prevalent in women (8.6% vs. 2.6%). Among subjects with BMI < 25 kg/m<sup>2</sup>, 2.9% of men and 27.0% of women had abdominal obesity. Hypertension prevalence was 9.8%.

Most participants (n=1078; 61.3%) were of Bantandu ethnicity, and 82.3% had a secondary education level (n=1448). Many participants were farmers or animal breeders (49.1%; n=864), yet only 31.4% (n=553) walked  $\geq$  one hour every day.

Incomplete censuses and the absence of key demographic data in the Kisantu area have precluded comparison of study participant characteristics with those in the general population.

### Characteristics of non-responders and second day absentees

Non-responders (n=107) were younger than responders ( $39.6 \pm 12.0$  vs.  $51.5 \pm 16.4$  years;  $P < 0.001$ ), and were more frequently male ( $53.2$  vs.  $35.9\%$ ;  $P < 0.001$ ). Age, gender, BMI, waist size, systolic and diastolic blood pressure were not significantly different in second day absentees and in participants with complete data. First day FPG was, as expected, significantly higher in second day absentees ( $6.1 \pm 0.5$  vs.  $5.3 \pm 1.9$  mmol/l;  $P < 0.05$ ).

### Prevalence of diabetes mellitus

Crude prevalence of diabetes mellitus was 4.8% (95% CI 3.9-5.9; n=85) (Table 1): men 5.5% (95% CI 3.9-7.6); women 4.4% (95% CI 3.3-5.8). Standardised prevalence was 4.2% and 4.0% according to Doll et al and UN world population prospects, respectively [14-15].

People with previously diagnosed diabetes represented 3.4% (n=59) of all subjects, and 69.4% of diabetes cases. Use of oGTT added only a single case of newly diagnosed diabetes. All other newly diagnosed cases were, therefore, detected using FPG. Highest diabetes prevalence was observed in the 50-69 age group (n=49).

### Prevalence of intermediate hyperglycaemia

According to WHO/IDF criteria, crude prevalence of IFG, IGT and IH was 4.7% (n=82), 1.1% (n=20), and 5.8% (95% CI 4.8-7.0; n=102), respectively. IH was observed in 4.6% of men and 6.5% of women (Table 1). IH was frequently observed in younger age groups: n=40 (6.4%) in age group 30-49 vs. n=33 (4.6%) in age group 50-69.

1  
2  
3 According to ADA 2003 criteria, IH prevalence was 14.2% (95% CI 12.6-15.8; n=250):  
4  
5 men 12.0%; women 15.4%. IFG was present in 12.6% (n=221) of subjects, and IGT in  
6  
7 1.6% (n=29).  
8  
9

10  
11 Standardised IH prevalence according to Doll et al. was 5.5% (WHO/IDF criteria) and  
12  
13 13.8% (ADA criteria). According to UN world population prospects, it was 5.7%  
14  
15 (WHO/IDF) (men 3.9%; women 6.6%) and 13.7% (ADA) (men 12.6%; women 15.4%).  
16  
17  
18  
19

### 20 21 **Prevalence of disorders of glycaemia**

22  
23 According to WHO/IDF criteria 10.6% (95% CI 9.2-12.1) of study participants had a  
24  
25 disorder of glycaemia, i.e. diabetes plus IH (men 10.1%; women 10.8%). Based on ADA  
26  
27 criteria disorders of glycaemia were observed in 19.0% of subjects (95% CI 17.2-20.9;  
28  
29 men 17.5%; women 19.8%). The proportion of disorders of glycaemia made up by IH  
30  
31 was 54.7% and 74.7% according to WHO/IDF and ADA criteria, respectively.  
32  
33  
34  
35

### 36 37 **Bivariate analysis of risk factors**

38  
39 Age was not significantly different in subjects with diabetes, IH or normoglycaemia.  
40  
41 Increasing degrees of glucose intolerance were associated with higher BMI values in both  
42  
43 sexes, although average BMI values were within the normal range in all categories.  
44  
45 Higher waist circumferences were observed in both sexes in subjects with diabetes and  
46  
47 IH. Similarly, systolic and diastolic blood pressure was increased in subjects with IH or  
48  
49 diabetes (*Table 1*).  
50  
51  
52  
53

54  
55 Current alcohol use was less prevalent in subjects with diabetes or IH compared to  
56  
57 normoglycaemic people ( $P < 0.05$ ). Family history of diabetes (%) was higher in people  
58  
59  
60

1  
2  
3 with diabetes (36.5%) than in IH (12.7%) and normoglycaemics (8.2%,  $P < 0.001$ ). No  
4  
5 statistical differences were observed between the three groups in terms of marital status,  
6  
7 ethnicity and level of education or occupation.  
8  
9

### 10 11 **Multivariate analyses of risk factors**

12  
13 Independent risk factors for diabetes were: male gender (OR 2.5; 95% CI 1.4-4.2); age  
14  
15 50-69 years (OR 2.6; 95% CI 1.5-4.3); family history of diabetes (OR 3.5; 95% CI 1.8-  
16  
17 6.8); and waist circumference (OR 4.1; 95% CI 2.5-6.8). If family history was negative,  
18  
19 alcohol consumption was protective (OR 0.4; 95% CI 0.2-0.7). If family history was  
20  
21 positive, alcohol consumption was a risk factor (OR=3.8; 95% CI 1.4-10.7). P for  
22  
23 interaction: 0.01.  
24  
25  
26  
27  
28

29  
30 A similar model that compared IH according to WHO/IDF criteria with normal people  
31  
32 resulted in only one risk factor: obesity (OR 2.6; 95% CI 1.4-4.6). IH defined according  
33  
34 to ADA was associated with waist circumference (OR 1.4; 95% CI 1.1-1.9); and primary  
35  
36 education level (OR 1.6; 95% CI 1.1-2.6). Moderate physical activity was protective.  
37  
38 BMI predicted IH (OR 0.7; 95% CI 0.5-0.9) when it replaced waist circumference in the  
39  
40 model.  
41  
42  
43  
44

### 45 **ROC analysis**

46  
47 In ROC analysis waist circumference (AUC 0.68; 95% CI 0.62-0.74) predicted diabetes  
48  
49 slightly better than BMI (AUC 0.61; 95% CI 0.54-0.68). Difference in AUC was 0.08;  
50  
51 95% CI 0.03-0.11.  
52  
53  
54  
55  
56  
57  
58  
59  
60

## DISCUSSION

This analytical cross-sectional survey with a participation rate of 87% proves that prevalence studies on NCDs are feasible, even in a Central African country which is one of the poorest countries in the world.

Crude prevalence of diabetes in adults in this study (4.8%) is higher than 2009 IDF estimates for DRC (2.6% for crude national prevalence; 3.2% prevalence adjusted to world population), and already exceeds 2030 IDF projections (3.2-4.4%) [3-4]. The present data from DRC are however largely in line with recent results from other countries in the region [3, 9, 17]. Standardised prevalence in our study is slightly lower than crude prevalence (4.0-4.2% vs. 4.8%). Other countries in SSA show similar results [3].

The crude prevalence of the present survey may have been influenced by the structure of the study sample that contained relatively few individuals aged < 50 years in whom diabetes tends to be less prevalent. In the present study, people aged < 20 years have been excluded, meaning that our population structure was truncated. The under-representation of young adult men in our study is not unique in SSA: women represented 52, 58, 62, and even 79% of study participants in previous studies [19-21]. This may, in part, be due to young men migrating to larger cities or mining areas for economic reasons. As agricultural activities are the main occupation of the Kisantu population, some men may also have preferred to go out to work in the fields.

Contrary to most other studies in SSA, newly detected diabetes was low (31%) in our study. Except in urban South Africa and in one study in rural Sudan, fewer than 50% of participants in previous surveys knew they had diabetes [5]. This may reflect effects of repeated diabetes awareness campaigns and level of diabetes care in Kisantu.



1  
2  
3 Crude prevalence of IH in the present survey (5.8% and 14.2% according to WHO/IDF or  
4  
5 ADA criteria, respectively) reflects mainly the proportion of subjects with IFG. The  
6  
7 lower glucose threshold used by ADA almost triples IFG prevalence compared to  
8  
9 WHO/IDF criteria, as was previously observed in surveys in Denmark, India and the  
10  
11 USA [13]. As a consequence, disorders of glycaemia, i.e. diabetes plus IH, according to  
12  
13 ADA criteria are observed in 19.0% of the semi-rural adult population of Kisantu.  
14  
15 Together with the high proportion of disorders of glycaemia made up by IH (54.7% and  
16  
17 74.7% according to WHO/IDF and ADA, respectively), these data suggest the early  
18  
19 stages of a diabetes epidemic in DRC. It is noteworthy that these observations are made  
20  
21 in people with normal average BMI values, according to Caucasian criteria.  
22  
23  
24  
25  
26

27  
28 A cross-sectional study cannot prove a cause and effect relationship between risk factors  
29  
30 and disease, only an association. However, combining statistical association and clinical  
31  
32 reasoning may provide an indication of such an effect, even in the absence of a  
33  
34 longitudinal study. Here, we use the term risk factor for a variable with both a significant  
35  
36 independent association with diabetes and a clinical suggestion about the direction of this  
37  
38 association. Independent risk factors for diabetes observed in this survey are similar to  
39  
40 those identified elsewhere in SSA: male gender, age 50-59 years, family history, and  
41  
42 waist circumference. BMI and waist circumference were risk factors for IH, while  
43  
44 moderate physical activity level was a protective factor. The latter observation supports  
45  
46 the conclusions of a recent study in Cameroon [22]: modest population-based changes in  
47  
48 physical activity may have significant benefits in terms of reducing the emerging burden  
49  
50 of metabolic diseases.  
51  
52  
53  
54  
55  
56  
57  
58  
59  
60

1  
2  
3 Main challenges for this study were the absence of reliable census data and trained field  
4  
5 workers, the difficulty of motivating the population, and performing biochemical tests  
6  
7 using low-cost, robust and simple technology. As in similar situations elsewhere, we had  
8  
9 to rely on cluster sampling [23-24]. Basic principles of the WHO STEPwise method were  
10  
11 followed [23], but we added repeat FPG testing or 2-hour post-load glucose in pre-  
12  
13 specified subgroups. This is consistent with WHO/IDF and ADA recommendations to  
14  
15 enhance chances of detecting diabetes cases and differentiate between IFG and IGT [12-  
16  
17 13, 25]. As 2-h post-load glucose was carried out in only a subset of participants,  
18  
19 prevalence of diabetes and IGT may have been underestimated. However, most  
20  
21 characteristics are perfectly comparable between attenders and non-attenders, but non-  
22  
23 attenders tended to be younger - and therefore related to even less diabetes risk compared  
24  
25 to attenders – and mostly males, unable to attend because they were working in the fields  
26  
27 or far from their home town – and therefore unlikely to have an undetected diabetes. If  
28  
29 none of the non-attenders would have diabetes, the prevalence would decrease from 4.8%  
30  
31 to 4.6%, what in our view has little relevance. We therefore have no reason to expect any  
32  
33 important difference between diabetes prevalence in second day attenders and non-  
34  
35 attenders.  
36  
37  
38  
39

40 Capillary blood glucose was measured because it is easier and less expensive than venous  
41  
42 tests. Also, WHO and IDF recognise in under-resourced countries the difficulty of  
43  
44 carrying out biochemical tests, unless low-cost technology is used [13, 23, 26]. We have  
45  
46 little information about the characteristics of the non-responders. Another weakness is  
47  
48 that we were unable to compare our study sample with the general population due to the  
49  
50 lack of an official population census map.  
51  
52  
53  
54  
55  
56  
57  
58  
59  
60

1  
2  
3 Strengths of our study are the large number of study participants and the high  
4 participation rate. This was obtained through visiting non-responders at home after each  
5 day of the survey [10], a high level of awareness and strong involvement of community  
6 members (health zone, local leaders, churches).  
7  
8  
9  
10

11 The high prevalence of diabetes mellitus in this rural town, and the even higher  
12 prevalence of IDF suggest a large burden of the disease in rural Congo and let us expect  
13 even larger numbers in the future.  
14  
15  
16  
17  
18  
19  
20  
21  
22  
23  
24  
25  
26  
27  
28  
29  
30  
31  
32  
33  
34  
35  
36  
37  
38  
39  
40  
41  
42  
43  
44  
45  
46  
47  
48  
49  
50  
51  
52  
53  
54  
55  
56  
57  
58  
59  
60

## Acknowledgements

The authors thank Okitolonda Wemakoy, Kiloka Nyandwe and Prince Kimpanga of Kinshasa University, School of Public Health, DRC; Mangani Nseka of Kinshasa University, Teaching Hospital; Marina Devis and Carla Truyers of the Department of General Practice, Catholic University Leuven; and Geert Molenberghs of the Department of Biostatistics.

We also acknowledge the field workers Baka Mampuya, Bungudi Edo, Gitambala Jérémie, Kapambu Laetitia, Kimbeni Fifi, Kuzungulu Bibiche, Luntadila Anita, Mafuta Mamie, Makengo Ange, Makiese Brigitte, Mamingila Richard, Matenda Anita, Mbombo Alpha, Mfutila Espérance, Ndengila Pitchouna, Ngiambila Zimbote, Nseka Baron, Nsiala Floribert, Nsoma Malou, and Sanga Pélagie.

**Declaration of Competing Interests:** Nothing to declare

## References

1. Dalal S, Beunza JJ, Volmink J, Adebamowo C, Bajunirwe F, Njelekela M et al. Non-communicable diseases in sub-Saharan Africa: what we know now. *Int J Epidemiol* 2011; 1-17 doi:10.1093/ije/dyr050.
2. Levitt NS. Diabetes in Africa: epidemiology, management and healthcare challenges. *Heart* 2008; **94**: 1376-1382.
3. IDF. Diabetes Atlas 4<sup>th</sup> edn. Brussels, Belgium: International Diabetes Federation 2009.
4. Shaw JE, Sicree RA, Zimmet PZ. Global estimates of the prevalence of diabetes for 2010 and 2030. *Diabetes Res Clin Pract* 2010; **87**: 4-14.
5. Mbanya JC, Motala AA, Sobngwi E, Assah FK, Enoru ST. Diabetes in sub-Saharan Africa. *Lancet* 2010; **375**: 2254-2266.
6. Gill GV, Mbanya JC, Ramaiya KL, Tesfaye S. A sub-Saharan African perspective of diabetes. *Diabetologia* 2009; **52**: 8-16.
7. McLarty DG, Swai AB, Kitange HM, Masuki G, Mtinangi BL, Kilima PM et al. Prevalence of diabetes and impaired glucose tolerance in rural Tanzania. *Lancet* 1989; **1**: 871-875.
8. Aspray TJ, Mugusi F, Rashid S, Whiting D, Edwards R, Alberti KG et al. Rural and urban differences in diabetes prevalence in Tanzania: the role of obesity, physical inactivity and urban living. *Trans R Soc Trop Med Hyg* 2000; **94**: 637-644.
9. Muyer MT, Muls E, Mapatano MA, Bieleli EO, Okitolonda W. Le diabète sucré en Afrique sub-Saharienne, une revue systématique de la littérature [Diabetes mellitus in sub-Saharan Africa, a systematic review of the literature]. *Louvain Médical* 2008; **127**: 153-165.

- 1  
2  
3 10. Muyer MT, Muls E, Mapatano MA, Makulo R, Mvitu M, Kimenyembo W et al.  
4  
5 Estimating prevalence of diabetes in a Congolese town was feasible. *J Clin Epidemiol*  
6  
7 2011; **64**: 172-181.  
8
- 9  
10 11. Kimfuta J. Rapport annuel du Bureau Central de la Zone de Santé de Kisantu [Annual  
11  
12 report of the central office of the health zone of Kisantu] 2005.  
13
- 14 12. American Diabetes Association. Follow-up report on the diagnosis of diabetes  
15  
16 mellitus. *Diabetes Care* 2003; **26**: 3160-3167.  
17
- 18 13. World Health Organization. Definition and diagnosis of diabetes mellitus and  
19  
20 intermediate hyperglycemia. Report of a WHO/IDF consultation. Geneva: WHO  
21  
22 2006.  
23
- 24 14. Alberti KG, Zimmet P, Shaw J. Metabolic syndrome – a new worldwide definition. A  
25  
26 consensus statement from the International Diabetes Federation. *Diabet Med* 2006;  
27  
28 **23**: 469-480.  
29
- 30 15. Doll R, Waterhouse J, Muir C, Parkin D, Whelan S, Ferlay I et al. Cancer incidence  
31  
32 in five continents: a technical report. Geneva, Lyon: International Union against  
33  
34 Cancer, International Agency for Research on Cancer 1966.  
35  
36
- 37 16. United Nations. Dept of Economic and Social Affairs. Population Division. World  
38  
39 Population Prospects. The 2008 Revision Population Database. Geneva: United  
40  
41 Nations 2008.  
42  
43
- 44 17. Hwnag CK, Han PV, Zabetian A, Ali MK, Narayan KMV. Rural diabetes prevalence  
45  
46 quintuples over twenty-five years in low- and middle-income countries: a systematic  
47  
48 review and meta-analysis. *Diab Res Clin Pract* 2012; **96**: 271-285.  
49
- 50 18. Baldé NM, Diallo I, Baldé MD, Barry LS, Kaba L, Diallo MM et al. Diabetes and  
51  
52 impaired fasting glucose in rural and urban populations in Futa Jallon (Guinea):  
53  
54 prevalence and associated risk factors. *Diabetes Metab* 2007; **33**: 114-120.  
55  
56  
57  
58  
59  
60

- 1  
2  
3 19. Omar M, Seedat M, Motala A, Dyer R, Becker P. The prevalence of diabetes mellitus  
4  
5 and impaired glucose tolerance in a group of urban South African blacks. *S Afr Med J*  
6  
7 1993; **83**: 641-643.  
8
- 9  
10 20. Levitt NS, Katzenellenbogen JM, Bradshaw D, Hoffman MN, Bonnici F. The  
11  
12 prevalence and identification of risk factors for NIDDM in urban Africans in Cape  
13  
14 Town, South Africa. *Diabetes Care* 1993; **16**: 601-607.  
15
- 16 21. Motala A, Esterhuizen T, Gouws E, Pirie F, Omar M. Diabetes and other disorders of  
17  
18 glycemia in a rural South African community: prevalence and associated risk factors.  
19  
20 *Diabetes Care* 2008; **31**: 1783-1788.  
21
- 22 22. Assah FK, Ekelund U, Brage S, JC Mbanya, Wareham NJ. Urbanization, physical  
23  
24 activity, and metabolic health in sub-Saharan Africa. *Diabetes Care* 2011; **34**: 491-  
25  
26 496.  
27
- 28 23. Bonita R, deCourten M, Dwyer T, Jamrosik K, Winkelmann R. Summary.  
29  
30 Monitoring of risk factors for non-communicable diseases: the WHO STEPwise  
31  
32 approach. Geneva, Switzerland: World Health Organization 2001.  
33  
34
- 35 24. Herold J. Surveys and sampling. In: Gregg M. ed, *Field epidemiology*. Oxford, UK:  
36  
37 Oxford University Press 2008..  
38  
39
- 40 25. American Diabetes Association. Position statement. Diagnosis and classification of  
41  
42 diabetes mellitus. *Diabetes Care* 2011; **34** (Suppl 1): S62-69.  
43  
44
- 45 26. IDF, *Diabetes Atlas 3th edn*. Brussels, Belgium: International Diabetes federation  
46  
47 2006.  
48  
49  
50  
51  
52  
53  
54  
55  
56  
57  
58  
59  
60

Table 1 Clinical characteristics and crude prevalence of diabetes, intermediate hyperglycaemia or normoglycaemia according to WHO/IDF 2006 criteria [13] or ADA 2003 criteria [12] of 1759 adults in Kisantu, DR Congo.

1  
2  
3  
4  
5  
6  
7  
8  
9  
10  
11  
12  
13  
14  
15  
16  
17  
18  
19  
20  
21  
22  
23  
24  
25  
26  
27  
28  
29  
30  
31  
32  
33  
34  
35  
36  
37  
38  
39  
40  
41  
42  
43  
44  
45  
46  
47  
48  
49

|                               | WHO / IDF    |              |                             |              |          | ADA          |                             |              |          |
|-------------------------------|--------------|--------------|-----------------------------|--------------|----------|--------------|-----------------------------|--------------|----------|
|                               | All          | Diabetes     | Intermediate Hyperglycaemia | Normal       | P-value* | Diabetes     | Intermediate Hyperglycaemia | Normal       | P-value* |
| <b>n</b>                      | 1759         | 85           | 102                         | 1572         |          | 85           | 250                         | 1424         |          |
| <b>Prevalence</b>             |              | 4.8 %        | 5.8 %                       | 89.4 %       |          | 4.8 %        | 14.2 %                      | 81.0 %       |          |
| <b>95% CI</b>                 |              | 3.8-5.9      | 4.8-7.0                     | 87.9-90.8    |          | 3.8-5.9      | 12.6-15.8                   | 79.1-82.8    |          |
| <b>Men (n=631)</b>            |              | 5.5 %        | 4.6 %                       | 89.9 %       |          | 5.5 %        | 12.0 %                      | 82.4 %       |          |
| <b>Women (n=1128)</b>         |              | 4.4 %        | 6.5 %                       | 89.1 %       |          | 4.4 %        | 15.4 %                      | 80.2 %       |          |
| <b>Age (years)</b>            |              |              |                             |              |          |              |                             |              |          |
| <b>Men</b>                    | 53.0 ± 17.0  | 56.6 ± 15.2  | 56.0 ± 15.9                 | 52.6 ± 17.2  | 0.26     | 56.6 ± 15.2  | 52.5 ± 15.7                 | 52.9 ± 17.3  | 0.40     |
| <b>Women</b>                  | 50.7 ± 16.0  | 55.2 ± 15.2  | 50.0 ± 16.3                 | 50.5 ± 16.0  | 0.13     | 55.2 ± 15.2  | 50.9 ± 14.9                 | 50.4 ± 16.2  | 0.12     |
| <b>BMI (kg/m<sup>2</sup>)</b> |              |              |                             |              |          |              |                             |              |          |
| <b>Men</b>                    | 20.6 ± 3.5   | 21.7 ± 4.7   | 21.5 ± 4.4                  | 20.5 ± 3.4   | 0.06     | 21.7 ± 4.6   | 21.6 ± 4.2                  | 20.4 ± 3.3   | 0.03     |
| <b>Women</b>                  | 22.3 ± 4.9   | 24.8 ± 5.7   | 23.1 ± 5.6                  | 22.1 ± 4.8   | 0.001    | 24.7 ± 5.7   | 22.8 ± 5.3                  | 22.1 ± 4.8   | 0.001    |
| <b>Waist (cm)</b>             |              |              |                             |              |          |              |                             |              |          |
| <b>Men</b>                    | 77.5 ± 11.0  | 84.4 ± 14.2  | 80.5 ± 13.5                 | 76.9 ± 10.5  | 0.001    | 84.4 ± 14.3  | 80.7 ± 13.3                 | 76.5 ± 0.1   | 0.001    |
| <b>Women</b>                  | 80.1 ± 13.5  | 88.5 ± 13.7  | 81.4 ± 13.2                 | 79.5 ± 13.3  | 0.001    | 88.5 ± 13.8  | 80.5 ± 13.0                 | 79.5 ± 13.4  | 0.0001   |
| <b>Blood pressure (mmHg)</b>  |              |              |                             |              |          |              |                             |              |          |
| <b>Systolic</b>               |              |              |                             |              |          |              |                             |              |          |
| <b>Men</b>                    | 124.4 ± 24.1 | 131.9 ± 25.0 | 130.5 ± 19.0                | 123.6 ± 21.3 | 0.03     | 131.9 ± 24.6 | 125.2 ± 18.9                | 123.8 ± 21.6 | 0.09     |
| <b>Women</b>                  | 119.2 ± 22.3 | 133.1 ± 28.4 | 126.2 ± 21.2                | 120.1 ± 21.0 | 0.001    | 133.9 ± 30.9 | 124.4 ± 22.9                | 117.4 ± 21.2 | 0.001    |
| <b>Diastolic</b>              |              |              |                             |              |          |              |                             |              |          |
| <b>Men</b>                    | 76.9 ± 12.4  | 81.2 ± 12.7  | 80.7 ± 12.3                 | 76.4 ± 12.3  | 0.02     | 81.2 ± 12.7  | 77.1 ± 13.0                 | 76.5 ± 12.3  | 0.09     |
| <b>Women</b>                  | 73.9 ± 12.4  | 80.7 ± 13.3  | 77.9 ± 12.6                 | 74.5 ± 12.3  | 0.001    | 80.4 ± 13.8  | 75.9 ± 12.1                 | 73.2 ± 12.2  | 0.001    |
| <b>Glycaemia (mmol/l)</b>     |              |              |                             |              |          |              |                             |              |          |
| <b>Men</b>                    | 5.4 ± 2.5    | 12.6 ± 7.2   | 6.4 ± 0.6                   | 4.9 ± 0.5    | 0.001    | 12.6 ± 7.2   | 6.0 ± 0.5                   | 4.8 ± 0.5    | 0.001    |
| <b>Women</b>                  | 5.2 ± 1.5    | 9.9 ± 4.6    | 6.5 ± 0.4                   | 5.0 ± 0.5    | 0.001    | 9.9 ± 4.6    | 6.1 ± 0.5                   | 4.8 ± 0.5    | 0.001    |

\*: p –values relate to the degree of significance when comparing the means between diabetes, IH and normal and are based on ANOVA analysis



Flowchart: Participants in the Kisantu Diabetes Prevalence study

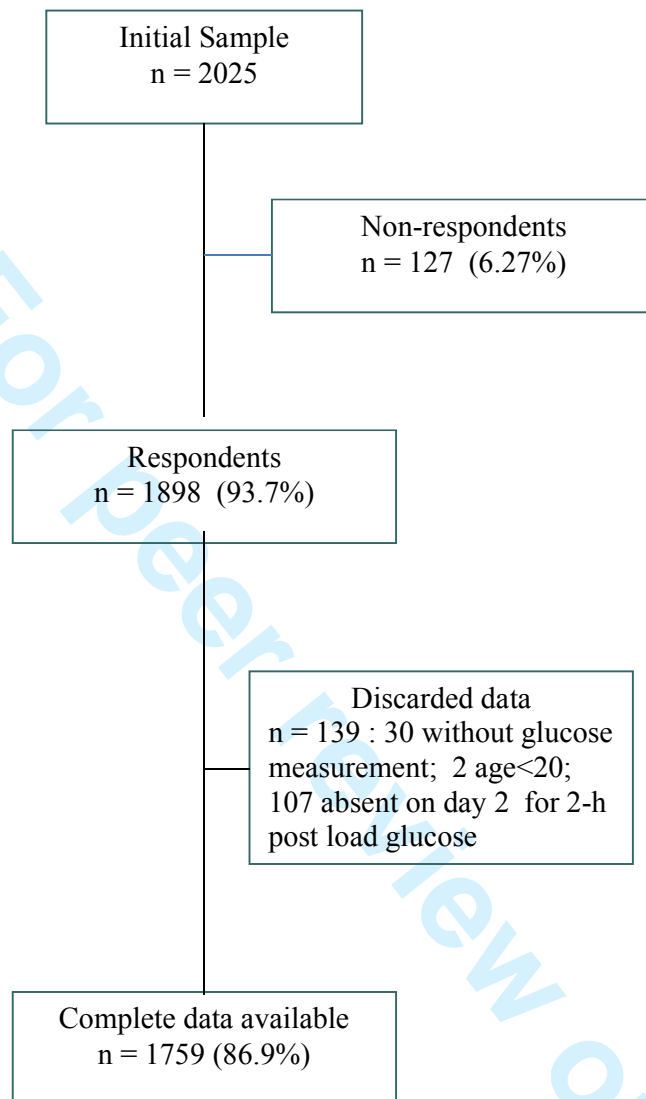

UNIVERSITE DE KINSHASA

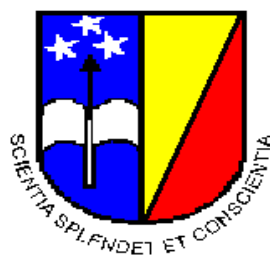

FACULTE DE MEDECINE  
ECOLE DE SANTE PUBLIQUE

ETUDE DE LA PREVALENCE DU DIABETE SUCRE, DE  
SES COMPLICATIONS MICROVASCULAIRES ET DES  
HYPERGLYCEMIES INTERMEDIAIRES CHEZ L'ADULTE

MUYER MARIE-CLAIRE

Avec la contribution du Dr Kimbondo  
Sous la supervision des Professeurs Mapatano, Okito, Kaimbo, Nseka  
et Bieleli

Sponsorisé par le VLIR et la WDF

ANNEE 2006

Version du 17 janvier 2008

|    |                                                                        |    |
|----|------------------------------------------------------------------------|----|
| 1  |                                                                        |    |
| 2  |                                                                        |    |
| 3  |                                                                        |    |
| 4  | Table des matières                                                     |    |
| 5  | Abréviations.....                                                      | 3  |
| 6  | 1. Résumé.....                                                         | 4  |
| 7  | 2. Introduction.....                                                   | 5  |
| 8  | 2.1. Généralités.....                                                  | 5  |
| 9  | 3. La problématique.....                                               | 5  |
| 10 | 3.1. Présentation de la Zone de Santé Rurale (ZSR) de Kisantu.....     | 5  |
| 11 | 3.2. Population couverte.....                                          | 6  |
| 12 | 3.3. Stratégies existantes.....                                        | 7  |
| 13 | 3.4. Justification de la présente étude.....                           | 7  |
| 14 | 4. Revue de littérature.....                                           | 8  |
| 15 | 4.1. Au niveau mondial, le diabète est une épidémie du XXI siècle..... | 8  |
| 16 | 4.2. Dans les pays développés.....                                     | 9  |
| 17 | 4.3. Dans les pays en voie de développement.....                       | 10 |
| 18 | 4.4. En R.D.C.....                                                     | 12 |
| 19 | 4.5. A Kisantu.....                                                    | 13 |
| 20 | 4.6. Les facteurs de risque de la maladie.....                         | 13 |
| 21 | 5. But et objectifs.....                                               | 17 |
| 22 | 5.1. But.....                                                          | 17 |
| 23 | 5.2. Objectif général.....                                             | 17 |
| 24 | 5.3. Objectifs spécifiques.....                                        | 17 |
| 25 | 6. Questions de recherche.....                                         | 17 |
| 26 | 7. Méthodologie.....                                                   | 17 |
| 27 | 7.1. Définitions opérationnelles.....                                  | 18 |
| 28 | 7.2. Type d' étude.....                                                | 21 |
| 29 | 7.3. Population d'étude.....                                           | 21 |
| 30 | 7.4. Méthodes diagnostiques.....                                       | 22 |
| 31 | 7.5. L'échantillonnage.....                                            | 22 |
| 32 | 7.5.1. Taille de l'échantillon.....                                    | 22 |
| 33 | 7.5.2. Technique d'échantillonnage.....                                | 22 |
| 34 | 7.6. Organisation de l'étude.....                                      | 24 |
| 35 | 7.6.1. Etats des lieux.....                                            | 24 |
| 36 | 7.6.2. La sensibilisation.....                                         | 24 |
| 37 | 7.6.3. La formation.....                                               | 24 |
| 38 | 7.6.4. Le relevé parcellaire.....                                      | 25 |
| 39 | 7.6.5. Le pretest.....                                                 | 25 |
| 40 | 7.6.6. L'identification des cibles.....                                | 26 |
| 41 | 7.6.7. La collecte de données.....                                     | 27 |
| 42 | 7.6.8. La mise en œuvre.....                                           | 33 |
| 43 | 7.7. Considération éthiques.....                                       | 36 |
| 44 | 7.8. Analyse de données.....                                           | 38 |
| 45 | 8. Le calendrier des activités.....                                    | 39 |
| 46 | 9. Le budget.....                                                      | 41 |
| 47 | 10. La gestion des fonds.....                                          | 41 |
| 48 | 10. Bibliographie.....                                                 | 49 |
| 49 | Annexes.....                                                           | 54 |
| 50 |                                                                        |    |
| 51 |                                                                        |    |
| 52 |                                                                        |    |
| 53 |                                                                        |    |
| 54 |                                                                        |    |
| 55 |                                                                        |    |
| 56 |                                                                        |    |
| 57 |                                                                        |    |
| 58 |                                                                        |    |
| 59 |                                                                        |    |
| 60 |                                                                        |    |

## ABREVIATIONS

|    |        |                                                                                                                              |
|----|--------|------------------------------------------------------------------------------------------------------------------------------|
| 1  |        |                                                                                                                              |
| 2  |        |                                                                                                                              |
| 3  |        |                                                                                                                              |
| 4  |        |                                                                                                                              |
| 5  |        |                                                                                                                              |
| 6  |        |                                                                                                                              |
| 7  |        |                                                                                                                              |
| 8  | ABD    | : Association Belge du diabète                                                                                               |
| 9  | ADA    | : American Diabetes Association                                                                                              |
| 10 | AGL    | : Acides Gras Libres                                                                                                         |
| 11 | ATCD   | : Antécédent                                                                                                                 |
| 12 | AV     | : Acuité Visuelle                                                                                                            |
| 13 | BCZS   | : Bureau Central de la Zone de Santé                                                                                         |
| 14 | CCr    | : Clairance à la créatinine                                                                                                  |
| 15 | FPG    | : Fasting plasma glucose                                                                                                     |
| 16 | FO     | : Fond Oeil                                                                                                                  |
| 17 | GDM    | : Gestational Diabetes Mellitus                                                                                              |
| 18 | HPO    | : Hyperglycémie orale                                                                                                        |
| 19 | IDF    | : International Diabetes Federation                                                                                          |
| 20 | IFG    | : Impaired Fasting Glucose                                                                                                   |
| 21 | IGT    | : Impaired Glucose Tolerance                                                                                                 |
| 22 | ISTM   | : Institut Supérieur des Techniques Médicales                                                                                |
| 23 | MCZS   | : Médecin chef de Zone de Santé                                                                                              |
| 24 | MRC    | : Maladie Rénale Chronique                                                                                                   |
| 25 | NHANES | : National Health and Nutrition Examination Survey                                                                           |
| 26 | NIDDK  | : National Institute of Diabetes and Digestive and Kidney Diseases                                                           |
| 27 |        |                                                                                                                              |
| 28 | OMS    | : Organisation Mondiale de la Santé                                                                                          |
| 29 | PA     | : Pression Artérielle                                                                                                        |
| 30 | PIO    | : Pression Intraoculaire                                                                                                     |
| 31 | RDC    | : République Démocratique du Congo                                                                                           |
| 32 | RD     | : Rétinopathie Diabétique                                                                                                    |
| 33 | UK     | : Université Kongo                                                                                                           |
| 34 | VLIR   | : Vlaamse Interuniversitaire Raad ( www.vlir.be)                                                                             |
| 35 | WDF    | : World Diabetes Foundation<br><a href="http://www.worlddiabetesfoundation.org/">http://www.worlddiabetesfoundation.org/</a> |
| 36 |        |                                                                                                                              |
| 37 | ZS     | : Zone de Santé                                                                                                              |
| 38 | ZSR    | : Zone de Santé Rurale                                                                                                       |
| 39 | TA     | : Tension Artérielle                                                                                                         |
| 40 | TGR    | : Triglycérides                                                                                                              |
| 41 | 2-h PG | : 2-h plasma glucose                                                                                                         |
| 42 |        |                                                                                                                              |
| 43 |        |                                                                                                                              |
| 44 |        |                                                                                                                              |
| 45 |        |                                                                                                                              |
| 46 |        |                                                                                                                              |
| 47 |        |                                                                                                                              |
| 48 |        |                                                                                                                              |
| 49 |        |                                                                                                                              |
| 50 |        |                                                                                                                              |
| 51 |        |                                                                                                                              |
| 52 |        |                                                                                                                              |
| 53 |        |                                                                                                                              |
| 54 |        |                                                                                                                              |
| 55 |        |                                                                                                                              |
| 56 |        |                                                                                                                              |
| 57 |        |                                                                                                                              |
| 58 |        |                                                                                                                              |
| 59 |        |                                                                                                                              |
| 60 |        |                                                                                                                              |

## 1. Résumé

En 2025, l'OMS estime que 80 % des individus avec diabète proviendront des pays en voie de développement.

La ZSR de Kisantu a 15 aires de santé avec une population de 130.805 habitants. La cité de Kisantu ou cité urbano-rurale de Inkisi a 4 aires de santé. La prise en charge des diabétiques est organisée à l'hôpital S<sup>t</sup> Luc, mais les statistiques montrent que le problème devient préoccupant par l'augmentation du nombre de cas.

Les études de prévalence en RDC n'ont pas recherché l'existence de complications au diagnostic et ont étudié peu de facteurs de risque. Aucune n'a fait 2 glycémies, ni utilisé le 2-h PG. A Kisantu se pose aussi le problème du retard de diagnostic des cas qui se présentent déjà avec des complications avancées.

Le but de notre étude est de contribuer à l'amélioration de la prise en charge du diabète sucré à Kisantu à partir de 2007. L'objectif général est de déterminer l'ampleur du diabète sucré à Kisantu. Les objectifs spécifiques sont de déterminer la prévalence du diabète sucré, de ses facteurs de risque, de ses complications microvasculaires, ainsi que la prévalence de la glycémie à jeûn perturbée chez l'adulte à Kisantu en 2007. Il y aura aussi la validation du dépistage fait par l'infirmier de la rétinopathie diabétique.

Nous voulons savoir si la prévalence du diabète sucré à Kisantu est comparable à celle qui est décrite ailleurs et si les complications du diabète sucré à Kisantu sont déjà présentes au diagnostic à une glycémie de 126 mg %.

La méthodologie proposée est celle de L'ADA et de l'OMS. Notre étude sera analytique transversale ciblant les ménages et concernant les sujets  $\geq 20$  ans, sans fièvre, ni déshydratation, ni coma, ni grossesse, résidents à Kisantu. La taille de notre échantillon sera de 2025 sujets et l'échantillonnage se fera par 4 degrés. L'étude sera précédée du relevé parcellaire, d'une formation des enquêteurs et du personnel et d'un prétest. La collecte des données se fera par l'enregistrement des cibles, l'interview, les mensurations (TA, poids, taille, tour de taille), l'examen au monofilament, les prélèvements (glycémie, albuminurie, microalbuminurie, la créatinémie) et les examens ophtalmologiques (AV, PIO, FO).

La mise en œuvre de l'étude sera réalisée avec l'encadrement de deux professeurs et la supervision de cinq médecins. Les malades passeront par une salle d'attente, puis par la salle des mensurations, d'interview et des prélèvements.

L'enquête durera au total 21 jours, y compris les imprévus et les récupérations. L'étude sera sponsorisée par Le VLIR et la WDF. Les fonds seront gérés par le projet VLIR.

L'étude sera présentée au Comité d'éthique de l'Ecole de Santé Publique.

## 2. Introduction

L'OMS estime qu' en 2025, 80 % des individus avec diabète proviendront des pays en voie de développement (WHO, 1997). Ainsi il serait souhaitable que ces pays prennent conscience de ce fait et surveillent l'évolution de la maladie dans leur population.

### 2.1. Généralités

#### 2.2.1. Définition du diabète sucré

L'OMS définit le diabète sucré comme un désordre métabolique à étiologies multiples caractérisées par une hyperglycémie chronique avec troubles du métabolisme des hydrates de carbone, des graisses et des protéines résultant d'une défaillance dans la sécrétion de l'insuline, de son action ou des deux. Les effets du diabète sucré incluent à long terme un dommage, une dysfonction et une défaillance des organes variés (WHO 1999).

## 3. La problématique

### 3.1. Présentation de la Zone de Santé Rurale (ZSR) de Kisantu (Rapport BCZS, 2006)

La ZSR de Kisantu située dans la province du Bas-Congo a une superficie de 2.400 km<sup>2</sup> et une altitude moyenne de 500 mètres. Elle recouvre 13 aires de santé.

Elle a un climat tropical avec deux saisons, la saison sèche et la saison humide. Les rivières Lukusu et Bongolo la séparent au Nord de la ZSR de Sona-Bata et au Sud de celle de Ngidinga. Ses limites sont à l'Est la ZSR de Nselo et la rivière Inkisi et à l'Ouest celle de Mboko-Kivulu.

La cité de Kisantu (créée par arrêté 21/148, 1956) est située à 120 Km de Kinshasa et à 220 Km de Matadi par route, sur la Nationale n°1, dans le territoire administratif de Madimba, dans le district de Lukaya. Tandis que la Nationale n°16 traverse Kisantu et va jusqu'à Popokabaka en passant par les zones de santé de Ngidinga et Kimvula jusqu'à la frontière de l'Angola. La cité de Kisantu porte aussi le nom de cité urbano-rural de Inkisi et comprend quatre aires de santé (Nkandu, Kikonka, Kintanu 1 et Kintanu 2). Sa superficie est de 3,50 km<sup>2</sup>.

Dans la cité de Kisantu se trouvent le Bureau Central de la Zone de Santé et l'Hôpital Général de Référence de cette zone, l'Hôpital Saint Luc.

Sur le plan économique, la population a un revenu faible. Les fonctionnaires sont payés irrégulièrement. L'agriculture est la principale activité économique bien qu'elle soit essentiellement une culture de subsistance. Les principales cultures sont le manioc, le

mbuengi, les arachides, les haricots, le soja et les patates douces. Les 31 % de la population vivent en milieu urbain et les 69 % en milieu rural. L'élevage de petit bétail et de volailles se fait à très bas échelle. Il s'agit de l'élevage de chèvres, moutons, porcs. Le gros bétail, les bœufs sont élevés à Lemfu et à Kipasa.

Sur le plan sanitaire, les pathologies dominantes sont le paludisme, les infections respiratoires aiguës, l'anémie, la méningite et le SIDA. Les problèmes environnementaux sont l'insalubrité, la promiscuité, l'insuffisance de latrines.

### 3.2. Population couverte (Rapport du BCZS, 2006).

La population couverte de la Zone de Santé Rurale de Kisantu est estimée à 130.805 habitants (tableau 1), mais l'étude a été sollicitée pour la cité de Kisantu (51595 hab.) par un médecin de Kisantu.

Sur le plan socio-culturel, le principal groupe ethnique est Ntandu (Bantandu). La religion principale est catholique, 54 % de la population. Les langues parlées sont le kikongo, le lingala et le français.

Tableau n° 1 Distribution de la population par aires de santé en janvier 2006 dans la ZSR de Kisantu.

| N  | AIRES DE SANTE | POPULATION | Cité de Kisantu |
|----|----------------|------------|-----------------|
| 1  | Nkandu         | 21506      | <b>51595</b>    |
| 2  | Kintanu 1      | 8500       |                 |
| 3  | Kintanu 2      | 11300      |                 |
| 4  | Kikonka        | 10289      |                 |
| 5  | Kavuaya        | 4293       |                 |
| 6  | Madimba        | 8717       |                 |
| 7  | Kipako         | 9864       |                 |
| 8  | Ngeba          | 12110      |                 |
| 9  | Lemfu          | 9700       |                 |
| 10 | Kipasa         | 2837       |                 |
| 11 | Kinangi        | 5150       |                 |
| 12 | Yimbi          | 2850       |                 |
| 13 | Kimwisi        | 11625      |                 |
|    | Total          | 130805     |                 |

Source : Rapport du recensement de Janvier 2006 (Bureau Central de la Zone de Santé Rurale de Kisantu.)

### 3.3. Stratégies existantes

La prise en charge des diabétiques est organisée au niveau de l'Hôpital Saint Luc. Le tableau 2 montre clairement que le diabète sucré s'accroît. La prévalence de 7 % (Nguala E.B., 2005) trouvée en 2005 dans le même milieu montre que c'est un problème préoccupant impliquant une charge financière pour les patients, leurs familles et les services de santé c'est une maladie chronique.

De tous les patients vus à l'Hôpital Saint Luc en 2004, 111 sont sous insuline et 359 sous hypoglycémifiants oraux. En 2005 sont sous insuline 213 et sous hypoglycémifiants 326; 7 patients combinent les 2 antidiabétiques.

Tableau n° 2 Répartition des malades diabétiques par sexe et par âge pour les années 2003 et 2005 à l'Hôpital Saint Luc de Kisantu

| Tranches d'âge (ans) | 2003       |            |            | 2004       |            |            | 2005       |            |            |
|----------------------|------------|------------|------------|------------|------------|------------|------------|------------|------------|
|                      | Sexe       |            | Total      | Sexe       |            | Total      | Sexe       |            | Total      |
|                      | H          | F          |            | H          | F          |            | H          | F          |            |
| 0 – 9                | -          | -          | -          | 0          | 2          | 2          | 0          | 1          | 1          |
| 10 – 25              | 4          | 7          | 11         | 3          | 3          | 6          | 10         | 6          | 16         |
| 26 – 40              | 63         | 83         | 146        | 41         | 87         | 128        | 26         | 44         | 70         |
| 41 – 55              | 51         | 18         | 69         | 140        | 91         | 231        | 66         | 97         | 163        |
| ≥ 56                 | 15         | 33         | 48         | 49         | 54         | 103        | 156        | 140        | 296        |
| <b>Total</b>         | <b>133</b> | <b>141</b> | <b>274</b> | <b>233</b> | <b>237</b> | <b>470</b> | <b>258</b> | <b>288</b> | <b>546</b> |

Source : Registre de médecine interne, Hôpital Saint Luc, Kisantu.

### 3.4. Justification de la présente étude

Une seule étude de prévalence du diabète sucré a été faite en milieu urbain, à Kinshasa (Bieleli E. et al., 2000). L'étude de Lubumbashi (Ilunga N.J., 2004) par contre n'a porté que sur les diabétiques connus excluant les nouveaux cas. Dans le milieu semi-rural une seule étude de prévalence a été faite à Kisantu en 2005 dans l'aire de santé de Kintanu (Nguala E.B., 2005). Ces études n'ont pas recherché les complications du diabète au diagnostic et ont étudié peu de facteurs de risque (obésité, ATCD héréditaires, HTA). Aucune d'elle n'a utilisé 2 glycémies. En recontrôlant la glycémie nous espérons améliorer la sensibilité de l'examen et rendre plus fiable la prévalence. La taille de leurs échantillons était petite, en l'augmentant nous espérons améliorer la précision de la prévalence.

Pourquoi avoir choisi Kisantu ? Il n'y a pas d'étude de prévalence en milieu rural ou semi rural. Nous voulons aussi vérifier si les résultats obtenus l'an passé par Nguala se maintiennent.

Il se pose à Kisantu un problème de diagnostic précoce pour les malades qui s'ignorent ou ont une inaccessibilité financière. Ainsi ils se présentent la première fois avec des



1 complications du diabète tels que la gangrène des pieds, l'insuffisance rénale et des  
2 troubles oculaires.

3 Quand on sait que dans les pays industrialisés le diabète reste la première cause de cécité  
4 avant 50 ans et dans les pays en voie de développement il vient après le trachome  
5 (Grimaldi A., 2003). Aux USA c'est plus précoce, la cécité s'étend chez les 20-74 ans  
6 (ADA, 2003; NIDDK, 2005).

7 L'une des causes de la cécité est la rétinopathie diabétique trouvée chez 20 % des  
8 diabétiques de type 2 lors de la découverte de leur diabète (Barile S., 2001) et aux USA  
9 chez > 60 % des type 2 pendant les 20 premières années de leur maladie (ADA, 2003).  
10 Ainsi la fréquence de la rétinopathie augmente avec la durée du diabète. Ceci est  
11 démontré par Kaimbo en RDC qui trouve chez le diabétique ayant <10 ans de diabète,  
12 une fréquence de 39,60 % pour tous les âges et chez ceux ayant > 10 ans 78,3 % (Kaimbo  
13 D et al., 1995).

14 De tous les diabétiques 20 à 30 % développent une néphropathie diabétique (ABD, 1999;  
15 ADA, 2003).

16 Malgré la progression des cas en milieu hospitalier (Tableau 2) et l'étude pilote (Nguala  
17 E.B., 2005), l'ampleur de la maladie dans la communauté n'est pas bien connue. Le  
18 diabète de type 2 est fréquemment non diagnostiqué jusqu'à l'apparition des  
19 complications.

20 A peu près 1/3 des individus avec diabète peuvent être méconnus (ADA, 2003, NIDDK,  
21 2005). King parle de 20-50 % (King H. et al., 1993). Au Cameroun, Mbanya dans une  
22 étude en 1996 en milieu rural démontre que 67 % des diabétiques étaient méconnus, alors  
23 qu'en milieu urbain 57 % l'étaient (Mbanya J.C. et al., 1997). Tandis qu'en Chine en  
24 2001, parmi les diabétiques adultes de 35 à 74 ans 76 % étaient méconnus auparavant  
25 (Gu D. et al., 2003).

26 D'autre part le besoin de données ressenti par le Programme National de Lutte contre le  
27 Diabète et le Centre d'Epidémiologie du Diabète motivent grandement cette étude.

#### 28 4. Revue de littérature

##### 29 4.1. Au niveau mondial, le diabète est une épidémie du XXI siècle

30 Le diabète est actuellement l'une des maladies non transmissibles les plus courantes à  
31 l'échelle mondiale (FID, 2003). Il représente la quatrième ou la cinquième cause de  
32 mortalité dans la plupart des pays industrialisés et on note une tendance à prendre la  
33 forme d'une épidémie dans de nombreux pays en voie de développement ou  
34 nouvellement industrialisés (Grimaldi, 2003; FID, 2003; Zimmet et al., 1996).

35 Au niveau mondial la prévalence du diabète sucré en 2003 représentait 194 millions de  
36 personnes (5,1 % de tous les adultes), en 2025 il est projeté 333 millions d'individus soit  
37 6,3 % de la population adulte (IDF, 2003). King après analyse de données de plusieurs  
38 pays, de 4 % en 1995 projetait 5,4 % en 2025 avec une augmentation pour les pays  
39 industrialisés de 42 % et dans les pays en voie développement de 170 % (King H. et al,  
40 1998). En 2000, 171 millions de personnes avaient le diabète et en 2030 ce serait 366  
41 millions (WHO, 2006).

Les complications liées au diabète, telles que les maladies cardio-vasculaires, les attaques cérébrales, les neuropathies diabétiques, les amputations, les insuffisances rénales et la cécité ont pour effet d'augmenter l'invalidité, de réduire l'espérance de vie et d'impliquer des frais médicaux lourds. Le diabète sucré constitue certainement l'un des défis majeurs du 21<sup>ème</sup> siècle en terme de santé (Grimaldi, 2003; IDF, 2003; ADA, 2003).

#### 4.2. Dans les pays développés

Plusieurs études de prévalence ont été réalisées en Amérique, en Europe et en Océanie.

Tableau n° 3 Prévalence du diabète sucré dans les pays développés par année croissante

| Années             | Région ou Pays                                           | Prévalence du diabète : % | Age (ans)              | Méthodes                                                     | Références                                          |
|--------------------|----------------------------------------------------------|---------------------------|------------------------|--------------------------------------------------------------|-----------------------------------------------------|
| <b>EN AMERIQUE</b> |                                                          |                           |                        |                                                              |                                                     |
| 1987               | Danemark                                                 | 4,5                       | 60-74                  |                                                              | Barcelo A., 2000                                    |
| 1992               | Canada                                                   | 13,15                     | ≥ 40                   | FPG                                                          | Barcelo A., 2000                                    |
| 1994               | USA                                                      | 4,8                       |                        |                                                              | Acton KJ, 2003                                      |
| 2001               | USA                                                      | 7,3                       |                        |                                                              | Acton KJ, 2003                                      |
| 2003               | Amérique du Nord                                         | 7,9                       | 20-79                  |                                                              | FID 2003                                            |
| 2005               | USA                                                      | 7                         | Tous âges              |                                                              | NIDDK, 2005                                         |
| <b>EN EUROPE</b>   |                                                          |                           |                        |                                                              |                                                     |
| 1980               | Belgique                                                 | 4,1                       | 35-64                  | FPG                                                          | Capet F. et al., 1999 (Monica)                      |
| 1997               | Belgique                                                 | 2,3                       | Tous âges              | Interview Analyse des dossiers médicaux                      | Capet F. et al., 1999 (Enquête Santé par Interview) |
| 1998               | France                                                   | 2,7                       | Tous âges              | Enquête CNAMS remboursements des traitements antidiabetiques | Eschwège E., 2005                                   |
| 1998               | Pays-Bas                                                 | 2,2                       | Tous âges, âge ajustée |                                                              | Ubink-Veltmaat L.J., 2003                           |
| 2000               | France                                                   | 2,96                      | Tous âges              | Enquête CNAMS remboursements des traitements antidiabetiques | Eschwège E., 2005                                   |
| 2000               | Pays-Bas                                                 | 2,9                       | Tous âges, âge ajustée |                                                              | Ubink-Veltmaat L.J., 2003                           |
| 2001               | U.K.<br>Europeens<br>Africains<br>Caraïbes<br>Pakistanaï | 20<br>22<br>33            | 25-79 ans              | 2-h PG                                                       | Riste L., 2001                                      |

| Années            | Région ou Pays | Prévalence du diabète : % | Age (ans)                        | Méthodes      | Références               |
|-------------------|----------------|---------------------------|----------------------------------|---------------|--------------------------|
| 2003              | Europe         | 7,8                       | 20-79                            |               | FID 2003                 |
| 2003              | Allemagne      | 10,2                      | 20-79                            |               | FID, 2003                |
| 2003              | Espagne        | 9,9                       | 20-79                            |               | FID, 2003                |
| 2003              | Europe         | < 10<br>10-20             | 30-89<br>< 60 ans<br>60 – 79 ans | FPG<br>2-h PG | DECODE Study Group, 2003 |
| <b>EN OCEANIE</b> |                |                           |                                  |               |                          |
| 2003              | Australie      | 7,4                       | 25                               | 2-h PG        | Zimmet P., 2003          |

La comparaison de la prévalence entre les différents pays est rendue difficile. Il y a un manque de standardisation des définitions et des méthodes. Elles sont basées tantôt sur la déclaration seule des malades, tantôt sur les ordonnances des malades, tantôt sur le FPG, tantôt sur le 2-h glucose. Le FPG seul entraîne une sous-estimation de la prévalence (DECODE, 2003). Les lacunes résident parfois en l'absence des nouveaux cas, pour d'autres dans le fait de ne pas tenir compte des malades sous régime seul. L'âge est souvent différent, certains considèrent telle tranche d'âge ou aucune, d'autres standardisent l'âge.

L'augmentation de la prévalence est reliée dans la plupart des études à celle de l'obésité, parfois au manque d'activité physique et au vieillissement.

#### 4.3 Prévalence du diabète sucré dans les pays en voie de développement par année croissante

En général la prévalence augmente avec l'âge et l'obésité comme pour les pays développés dans les pays asiatiques, arabes, américains, océaniques et africains.

La méthode utilisée amène aussi des variations dans la prévalence. Le FPG seul donne des sous-estimations (DECODA, 2003).

Tableau n° 4 Prévalence du diabète sucré dans les pays Asiatiques et du Pacifique

| Années | Région ou Pays ou Ethnie                         | Prévalence du diabète (%) | Age (ans) | Méthodes | Références                                         |
|--------|--------------------------------------------------|---------------------------|-----------|----------|----------------------------------------------------|
| 1980   | Chine                                            | 1% en milieu urbain       | 25-74     | FPG      | Gu D. et al, 2003                                  |
| 1981   | Polynésie<br>en milieu urbain<br>en milieu rural | 10<br>3,6                 |           |          | Zimmet P. et al., 1981                             |
| 1989   | Inde                                             | 8,2                       |           |          | Ramachandran A., 1997                              |
| 1987   | Nauru (Océanie)                                  | 41,3                      | ≥ 20      | HPO      | King H. et al., 1993.<br>Fontbonne A. et al., 2003 |
| 1994   | Chine                                            | 2,5                       | 25-64     | FPG      | Gu D. et al, 2003                                  |
| 1995   | Inde                                             | 11,6                      |           |          | Ramachandran A., 1997                              |
| 1999   | Sri Lanka<br>milieu urbain<br>milieu rural       | 12<br>8                   |           |          | Ghaffar A., 2004                                   |

| Années | Région ou Pays ou Ethnie                    | Prévalence du diabète (%) | Age (ans) | Méthodes | Références       |
|--------|---------------------------------------------|---------------------------|-----------|----------|------------------|
| 2000   | Bengladesh<br>milieu urbain<br>milieu rural | 8<br>4                    |           |          | Ghaffar A., 2004 |
| 2000   | Pakistan                                    | 12                        |           |          | Ghaffar A., 2004 |
| 2000   | Nepal<br>milieu urbain<br>milieu rural      | 15<br>3                   |           |          | Ghaffar A., 2004 |
| 2003   | Pacifique Occidentale                       | 3,1                       | 20-79     |          | FID 2003         |
| 2003   | Singapour                                   | 12,3                      | 20-79     |          | FID 2003         |

Les pays avec le plus grand nombre de diabétiques restent l'Inde (King H., 1998 ; Ghaffar A., 2004 ), la Chine et les USA (King H., 1998). Par rapport aux pays développés la prévalence est plus importante à un âge plus bas 45-64 ans (King H., 1998), 30-79 ans (DECODA, 2003).

En 2025 L'Inde resterait en tête avec une augmentation de 195 % comparé à 1995 (Ghaffar A., 2004). Les facteurs génétiques sont ici les plus incriminés (DECODA, 2003).

Curieusement la prévalence est plus grande en Asie mais avec un BMI plus bas qu'en Occident (Ghaffar A., 2004 ).

Tableau n° 5 Prévalence du diabète sucré dans les pays du Moyen-Orient par ordre croissant

| Années      | Région ou Pays ou Ethnie | Prévalence du diabète (%) | Age (ans)         | Méthodes    | Références                  |
|-------------|--------------------------|---------------------------|-------------------|-------------|-----------------------------|
| 1991        | Oman                     | 12,2                      | ≥ 20              | FPG (veine) | Al-Lawati J.A. et al., 2002 |
| 1999 à 2001 | Téhéran                  | 5,4                       | 30-69             | 2-h PG      | Saadat N., 2001             |
| 2000        | Oman                     | 16.1                      | 30-64 âge ajustée | FPG (veine) | Al-Lawati J.A. et al., 2002 |
| 2001        | Palestine                | 12                        |                   | 2-h PG      | Abdul-Rahim HF et al., 2001 |

La tendance est croissante comme dans les pays développés.

Tableau n° 6 Prévalence du diabète sucré en Amérique

| Années | Région ou Pays ou Ethnie  | Prévalence du diabète (%) | Age (ans) | Méthodes | Références              |
|--------|---------------------------|---------------------------|-----------|----------|-------------------------|
| 1966   | Uruguay                   | 6,9                       |           |          | Barcelo A. et al., 2001 |
| 1966   | Vénézuéla                 | 7,3                       |           |          | Barcelo A. et al., 2001 |
| 1997   | Pima                      | 50                        | 30-64     |          | King H. et al., 1993    |
| 1998   | Costa Rica                | 2,8                       |           |          | Barcelo A. et al., 2001 |
| 2005   | Canada (Indiens Oji-Cree) | 40                        |           |          | Hegele R.A., 2005       |

Le passage d'une vie traditionnelle à l'occidentale a entraîné une explosion du diabète.

Tableau n° 7 Prévalence du diabète sucré en Afrique

| Années | Région ou Pays ou ville                                                              | Prévalence du diabète (%) | Age (ans) | Méthodes      | Références                    |
|--------|--------------------------------------------------------------------------------------|---------------------------|-----------|---------------|-------------------------------|
| 1901   | Ouganda                                                                              | rare                      |           |               | Gautier J.-F et al., 2001     |
| 1990   | Tanzania                                                                             | 12-13                     |           |               | Sobngwi E. et al., 2001       |
| 1993   | Egypte                                                                               | 9,3                       | ≥ 20      | FPG<br>2-h PG | Herman W. et al., 1997        |
| 1994   | Indiens, Afrique du Sud                                                              | 12-13                     |           |               | Sobngwi E. et al., 2001       |
| 1996   | Soudan                                                                               | 3,4                       |           |               | Ahmed A., 2006                |
| 1997   | Cameroun<br>homme m. urbain<br>femmes m. urbain<br>homme m. rural<br>femmes m. rural | 0,8<br>1,6<br>0,9<br>0,5; | 24-74     | 2-h PG        | Mbanya J.C, 1997              |
| 1997   | Nigeria                                                                              | 2,8                       |           | FPG           | Owoaje E. et al., 1997        |
| 2001   | Bénin                                                                                | 1,1                       |           |               | Djrolo F                      |
| 2001   | Ghana                                                                                | 6,3                       |           |               | Amoah A., 2002                |
| 2001   | Tanzania<br>milieu urbain                                                            | 5-8                       |           |               | Unwin N. et al., 2001         |
| 2001   | Afrique du Sud milieu.<br>urbain                                                     | 5-8                       |           |               | Unwin N. et al., 2001         |
| 2003   | Ethiopie<br>milieu rural                                                             | 0,014                     |           |               | Watkins P., Alemu S.,<br>2003 |
| 2003   | Ile Mautice                                                                          | 10,7                      | 20-79     |               | FID, 2003                     |

L'Afrique suit la tendance mondiale avec une prépondérance pour le milieu urbain où l'occidentalisation est plus prononcée. En 1994 le diabète atteignait 3.000.000 et il est supposé être 2 X ou 3 X plus en 2010 (Gautier J.-F et al.).

A Libreville en 1980 le diabète représentait 0,5 des hospitalisations en médecine interne, quatre ans plus tard, c'était 2,7 % et dix ans plus tard 11,7 % (Ntyonga-Poo PP et al., 1996). En Tanzanie de 1996 à 1997 une différence de 3,8 % a été trouvée entre le milieu urbain et rural chez les hommes et de 2,9 % chez les femmes (Aspray T.J. et al., ).

Cependant une il y a lacune de données et un manque de standardisation des méthodes (Sobngwi E., 2001) rendant les comparaisons difficiles..

#### 4.4. En R.D.C.

Tableau n° 8 Prévalence du diabète sucré en République Démocratique du Congo

| Années | Région ou Pays ou ville | Prévalence du diabète (%) | Age (ans) | Méthodes | Références      |
|--------|-------------------------|---------------------------|-----------|----------|-----------------|
| 2000   | Kinshasa                | 7                         | ≥ 30      | FPG      | Bieleli et al . |
| 2005   | Kisantu                 | 7                         | ≥ 20      | FPG      | Nguala E.       |

Tableau n° 9 Fréquence du diabète sucré dans le milieu hospitalier en RDC

| Années      | Région ou Pays ou ville | Fréquence du diabète (%) | Age (ans) | Méthodes     | Références                  |
|-------------|-------------------------|--------------------------|-----------|--------------|-----------------------------|
| 1962        | Léopoldville            | 0,12                     |           |              | Bourgoignie J. et al., 1962 |
| 1960 à 1985 | Kinshasa.               | 5,8                      |           | FPG ( veine) | Kandjingu K., 2002          |
| 1996 à 2000 | Kimpese                 | 5,5                      |           |              | Bafende A.E. et al., 2001   |

Il y a une lacune criante de données. La prévalence se situe dans les limites des pays développés. Le 1<sup>er</sup> cas de diabète sucré été découvert à Léopoldville en 1922. (Bourgoignie J. et al., 1962). A Lubumbashi en 2002 l'étude était faite dans la communauté, 4,2 % de cas, portant seulement sur les diabétiques connus (Ilunga N.J, 2004).

#### 4.5. A Kisantu

Tableau n° 9 Fréquence des diabétiques à l'Hôpital Saint Luc de Kisantu de 1950 à 1959 parmi les malades hospitalisés

| Années | Nombre de malades | Proportion de diabète pour mille patients hospitalisés quel que soit le service |
|--------|-------------------|---------------------------------------------------------------------------------|
| 1950   | 3057              | 4,2                                                                             |
| 1951   | 3984              | 3                                                                               |
| 1952   | 3846              | 2,6                                                                             |
| 1953   | 4051              | 3,4                                                                             |
| 1954   | 4097              | 6,3                                                                             |
| 1955   | 3787              | 7,1                                                                             |
| 1956   | 3114              | 6,1                                                                             |
| 1957   | 3582              | 5,9                                                                             |
| 1958   | 2358              | 8                                                                               |
| 1959   | 2136              | 6,6                                                                             |

Source : Eyckmans en 1960 cité par Bourgoignie (Bourgoignie J. et al., 1962)

Même dans le milieu semi-rural on constate un croissance de cas.

#### 4.6. Les facteurs de risque du diabète sucré de type 2.

Le diabète est une maladie multifactorielle ayant des facteurs de risque modifiables et d'autres non modifiables qui agissent soit au niveau de l'insulinorésistance, soit au niveau de l'insulinosécrétion (Buysschaert M., 1998).

□ Les facteurs de risque qui agissent sur l'insulinorésistance

**Parmi ces facteurs de risque certains sont non modifiables** tel que la prédisposition génétique (ATCD de diabète chez les parents du 1<sup>er</sup> et du 2<sup>ème</sup> degré). La « NHANES » de 1999–2002 mentionne une prévalence du diabète plus élevée (14,3 %) parmi les individus avec un parent du 1<sup>er</sup> degré diabétique par rapport à ceux n'ayant pas d'antécédents familiaux de diabète (3,2 %). (ADA screening, 2003; Abdulbari B., 2005; Annis AM, 2005).

Une étude réalisée au Qatar mentionne une relation positive entre le diabète de type 2 et les mariages consanguins (Abdulbari B., 2005).

Il y a aussi l'ethnicité : les habitants de Nauru, les indiens Pima, les indiens de Singapour, les mexicains des Etats-Unis, les chinois de l'île Maurice et les noirs (FID, 2003; ADA, 2003; Annis AM, 2005).

Dans le diabète gestationnel il y a l'augmentation de l'hormone lipolytique qui entraîne la libération des acides gras libres (Goday A., 2005). Le GDM entraîne une insulinorésistance (ADA, 2003).

**Parmi les facteurs de risque modifiables** il y a le syndrome métabolique (obésité abdominale, la dyslipidémie, l'HTA (ADA screening, 2003)) souvent précurseur du diabète sucré de type 2 (Fumeron F., 2005).

L'obésité favorisée par la sédentarité (augmentation des travaux de bureau, de loisirs passifs tel que la télévision, abondance de transport public (Delpeuch B.M., 2005)) et l'ingestion des beaucoup de lipides. Un gain de poids de 10 % augmente de 3 X le risque de diabète de type 2 ainsi qu'une durée de surpoids de plus de 5 ans (Wannamethee SG et al., 1999). L'obésité surtout viscérale entraîne au niveau des adipocytes la sécrétion de cytokines qui inhibent l'action anti-lipolytique de l'insuline et entraînent la résistance à l'insuline et l'augmentation des acides gras. Il y a aussi la lipolyse des TGR avec libération des acides gras libres. Au niveau des muscles l'entrée des acides gras libres dans la cellule entraîne l'inhibition de l'oxydation du glucose et aussi diminue le transport du glucose d'où hyperglycémie. Au niveau du foie les acides gras libres entraînent la production des TGR avec inhibition de l'action de l'insuline suivie de la stimulation de la néoglucogenèse hépatique et sortie du glucose avec augmentation de lipides dans le foie entraînant la dyslipidémie du syndrome métabolique. Au niveau de la sécrétion de l'insuline dans la cellule  $\beta$ , à court terme les acides gras libres augmentent la sécrétion de l'insuline en réponse au glucose. Au long terme ils inhibent la sécrétion de l'insuline et provoquent une lipotoxicité (Fumeron F., 2005).

L'hypertension artérielle a été mentionnée comme souvent liée au diabète ( ADA, 2003; Bonita R., 2001; ADA screening, 2003)..

Il y a aussi dans ce groupe les sujets avec hyperglycémies intermédiaires : les IFG et les IGT (Edelstein SL. et al, 1997) qui entraînent aussi une insulinorésistance (WHO, 2006) par le mécanisme de l'obésité ? Ceci n'est pas vrai pour les Asiatiques (Nishi Y. et al., 2005).



1  
2  
3 Comme autre facteur de risque notons aussi la naissance de bébé de 4 kg ou plus (ADA  
4 (Diagnosis, 2003), les morts in utéro et la notion d'avortement répété.  
5  
6

- 7     □ Les facteurs de risque qui agissent sur l'insulinosécrétion  
8

9 **Le facteur de risque non modifiable** est l'âge avancé  $\geq 45$  ans (ADA, 2006).  
10

11 **Parmi les facteurs de risque modifiables** nous avons l'alcool qui entraîne une  
12 pancréatite chronique calcifiante. Ces facteurs entraînent une diminution des cellules  $\beta$  et  
13 une insulinosécrétion conduisant à l'hyperglycémie chronique.  
14

15 Dans l'IFG et l'IGT il y a aussi insulinosécrétion dont le mécanisme n'est pas encore  
16 bien élucidé, serait-ce les facteurs génétiques?  
17

18  
19 Le modèle conceptuel présenté ci dessous reprend quelques facteurs de risques que nous  
20 comptons explorer dans notre étude.  
21  
22  
23  
24  
25  
26  
27  
28  
29  
30  
31  
32  
33  
34  
35  
36  
37  
38  
39  
40  
41  
42  
43  
44  
45  
46  
47  
48  
49  
50  
51  
52  
53  
54  
55  
56  
57  
58  
59  
60



Figure n°1 Modèle conceptuel de quelques facteurs de risque du diabète du type 2

**Facteurs environnementaux**

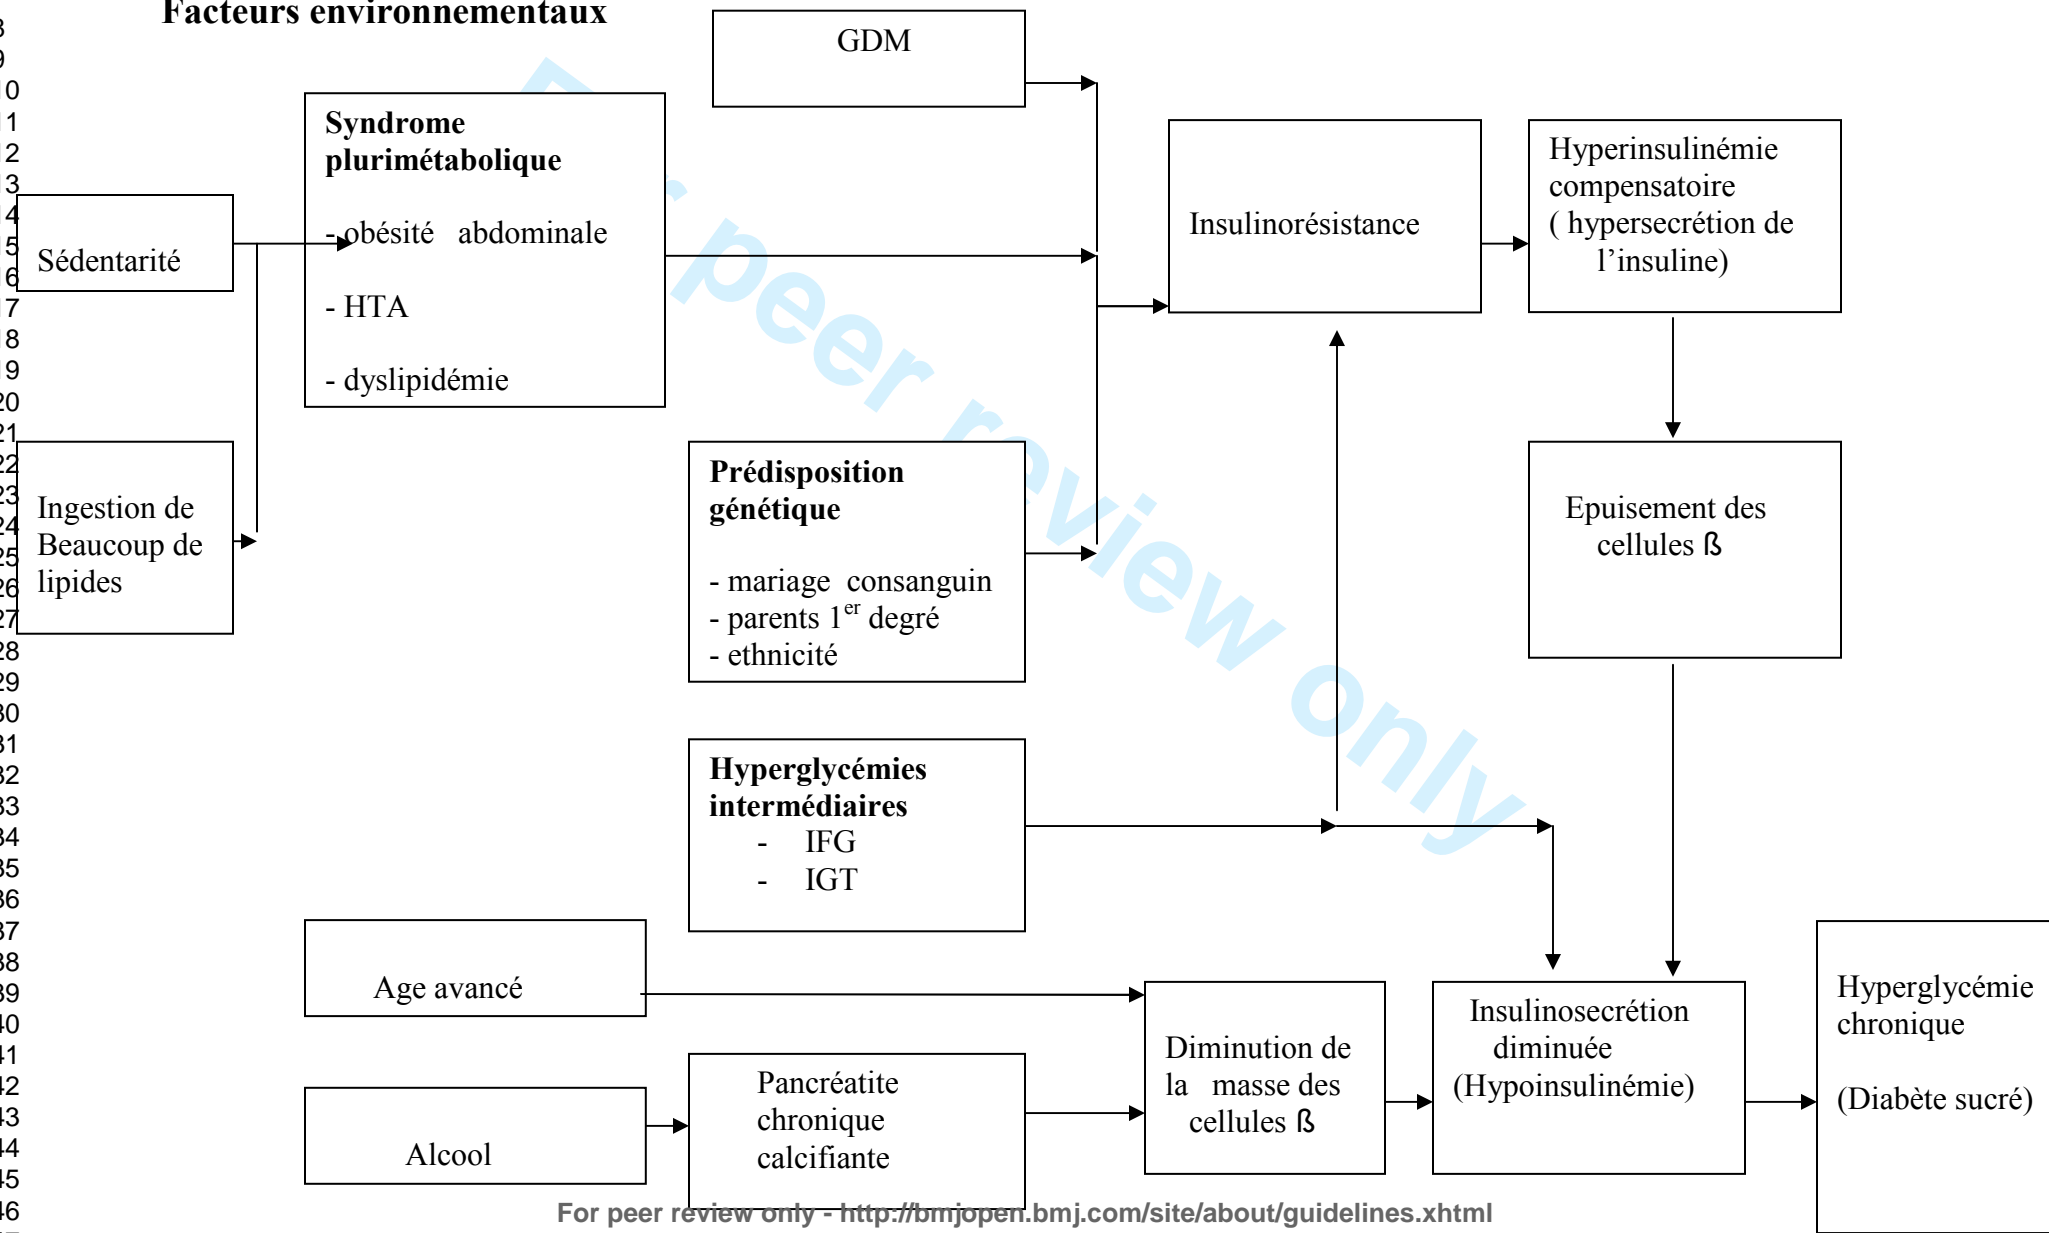

## 5. But et objectifs

### 5.1. But

Contribuer à l'amélioration de la prise en charge du diabète sucré en R.D.C. à partir de l'année 2007.

### 5.2. Objectif général

Déterminer l'ampleur du diabète sucré à Kisantu en 2007, de ses complications microvasculaires et des facteurs de risques au moment du diagnostic .

### 5.3. Objectifs spécifiques

5.3.1. Déterminer la prévalence du diabète sucré et des hyperglycémies intermédiaires chez l'adulte à Kisantu en 2007.

5.3.2. Déterminer la proportion du diabète sucré détecté après surcharge de glucose et la proportion de diabète sucré ainsi que les IGT que l'on aurait pas diagnostiqué lors d'une première glycémie chez l'adulte à Kisantu en 2007.

5.3.3. Vérifier l'existence de complications microvasculaires aux seuils de glycémie de 100 -125 mg % et aux seuils de 110 – 125 mg %.

5.3.4. Déterminer la prévalence des facteurs de risque du diabète sucré et la relation avec le diabète sucré et les hyperglycémies intermédiaires chez l'adulte à Kisantu en 2007.

5.3.5. Déterminer la prévalence des complications microvasculaires (la rétinopathie diabétique, la néphropathie diabétique et la neuropathie diabétique) et de l'hypertension artérielle chez les diabétiques à Kisantu en 2007.

## 6. Questions de recherche

6.1. La prévalence du diabète sucré chez l'adulte à Kisantu est-elle comparable à celle qui est décrite dans les pays développés, les autres pays en voie de développement ou antérieurement en RDC?

6.2. La proportion du diabète sucré méconnu chez l'adulte dans la population est-elle la même que celle décrite ailleurs ?

6.3. La prévalence des hyperglycémies intermédiaires chez l'adulte à Kisantu est-elle comparable à celle qui est décrite ailleurs ?

6.4. Quel est la proportion de cas de diabète confirmé dans le groupe des IFG?

6.5. La prévalence des complications microvasculaires chez l'adulte à Kisantu dans les hyperglycémies intermédiaires est-elle la même que celle qui est décrite ailleurs ?

## 7. Méthodologie

La méthodologie suivie est celle proposée par l'OMS (Bonita R, 2001) et l'ADA (ADA, 2003 et 2006) qui permet la standardisation des méthodes et la comparaison avec les autres pays

### 7.1. Définitions opérationnelles

- ❖ Le diabète sucré sera défini dans notre étude sur base de l'ADA screening 2006 et de l'OMS 2006 : si c'est un cas de diabète connu s'il a un carnet de diabétique ou s'il est sous traitement antidiabétique. Si c'est un cas de diabète méconnu sur base des examens tel que mentionnés dans la figure 2.
- ❖ L'IFG est définie comme une hyperglycémie intermédiaire avec une glycémie à jeun entre 100 et 125 mg %.
- ❖ L'IGT est définie comme une hyperglycémie intermédiaire avec une glycémie 2 heure après une charge de 75 g de glucose de 140 à 199 mg %.
- ❖ Il y a une discordance entre l'ADA et l'OMS pour la définition de l'IFG 100-125 mg% (ADA diagnosis, jan 2006) et 110-125 mg % (WHO, 2006). Nous suivront l'ADA pour ne pas manquer les complications qui pourraient arriver à des seuils bas et pour effectuer dans un second temps la surcharge glucidique afin de mieux dwpister les IGT et le diabète sucré.

Les définitions du diabète sucré, des hyperglycémies intermédiaires et les examens à faire dans chaque cas sont représentées la figure n° 2 .

- ❖ Les ATCD suivants seront recherchés par l'interview : les femmes ayant accouché de bébé de plus de 3,8 kg, la prise d'alcool avec 2 catégories : consomme ou ne consomme pas, les individus avec comportement sédentaire (déplacement habituel autre que le pied ou le vélo, marche à pied moins que 1 h), les individus avec une d'hypertension, avec un antécédent de diabète dans la famille. Seront aussi recherchés la consommation de certains aliments ( les sucres d'absorption rapides, les lipides, les aliments pauvres en fibres alimentaires).
- ❖ Les caractéristiques de la population seront recherchées telles que les habitudes alimentaires : la consommation de sucres à absorption rapide, des graisses surtout animales, de légumes, de fruits et des amidons, la teneur pauvre en fibres alimentaires et la consommation de tabac
- ❖ L'obésité sera calculée par la valeur de l'indice de masse corporelle, le poids (Kg)/taille (m<sup>2</sup>),  $\geq 30 \text{ kg/m}^2$  (WHO, consulté en nov 2006, Baso, 2001).
- ❖ L'obésité abdominale ou viscérale sera définie par une valeur du tour de taille  $\geq 94$  cm et  $\geq 80$  cm, respectivement pour l'homme et la femme (Zimmet P., 2006).
- ❖ On parle d'hypertension :
  - lorsque la valeur de la pression systolique (PS)  $\geq 140$  mm Hg et de la pression diastolique (PD)  $\geq 90$  mm Hg (ADA, jan 2006 ; WHO 1999). On parlera d'hypertension isolée lorsque la systole seule ou la diastole seule est élevée.

FIGURE N° 2 Définitions du diabète sucré, des hyperglycémies intermédiaires et les examens à faire dans chaque cas lors de l'étude de Kisantu. en 2007

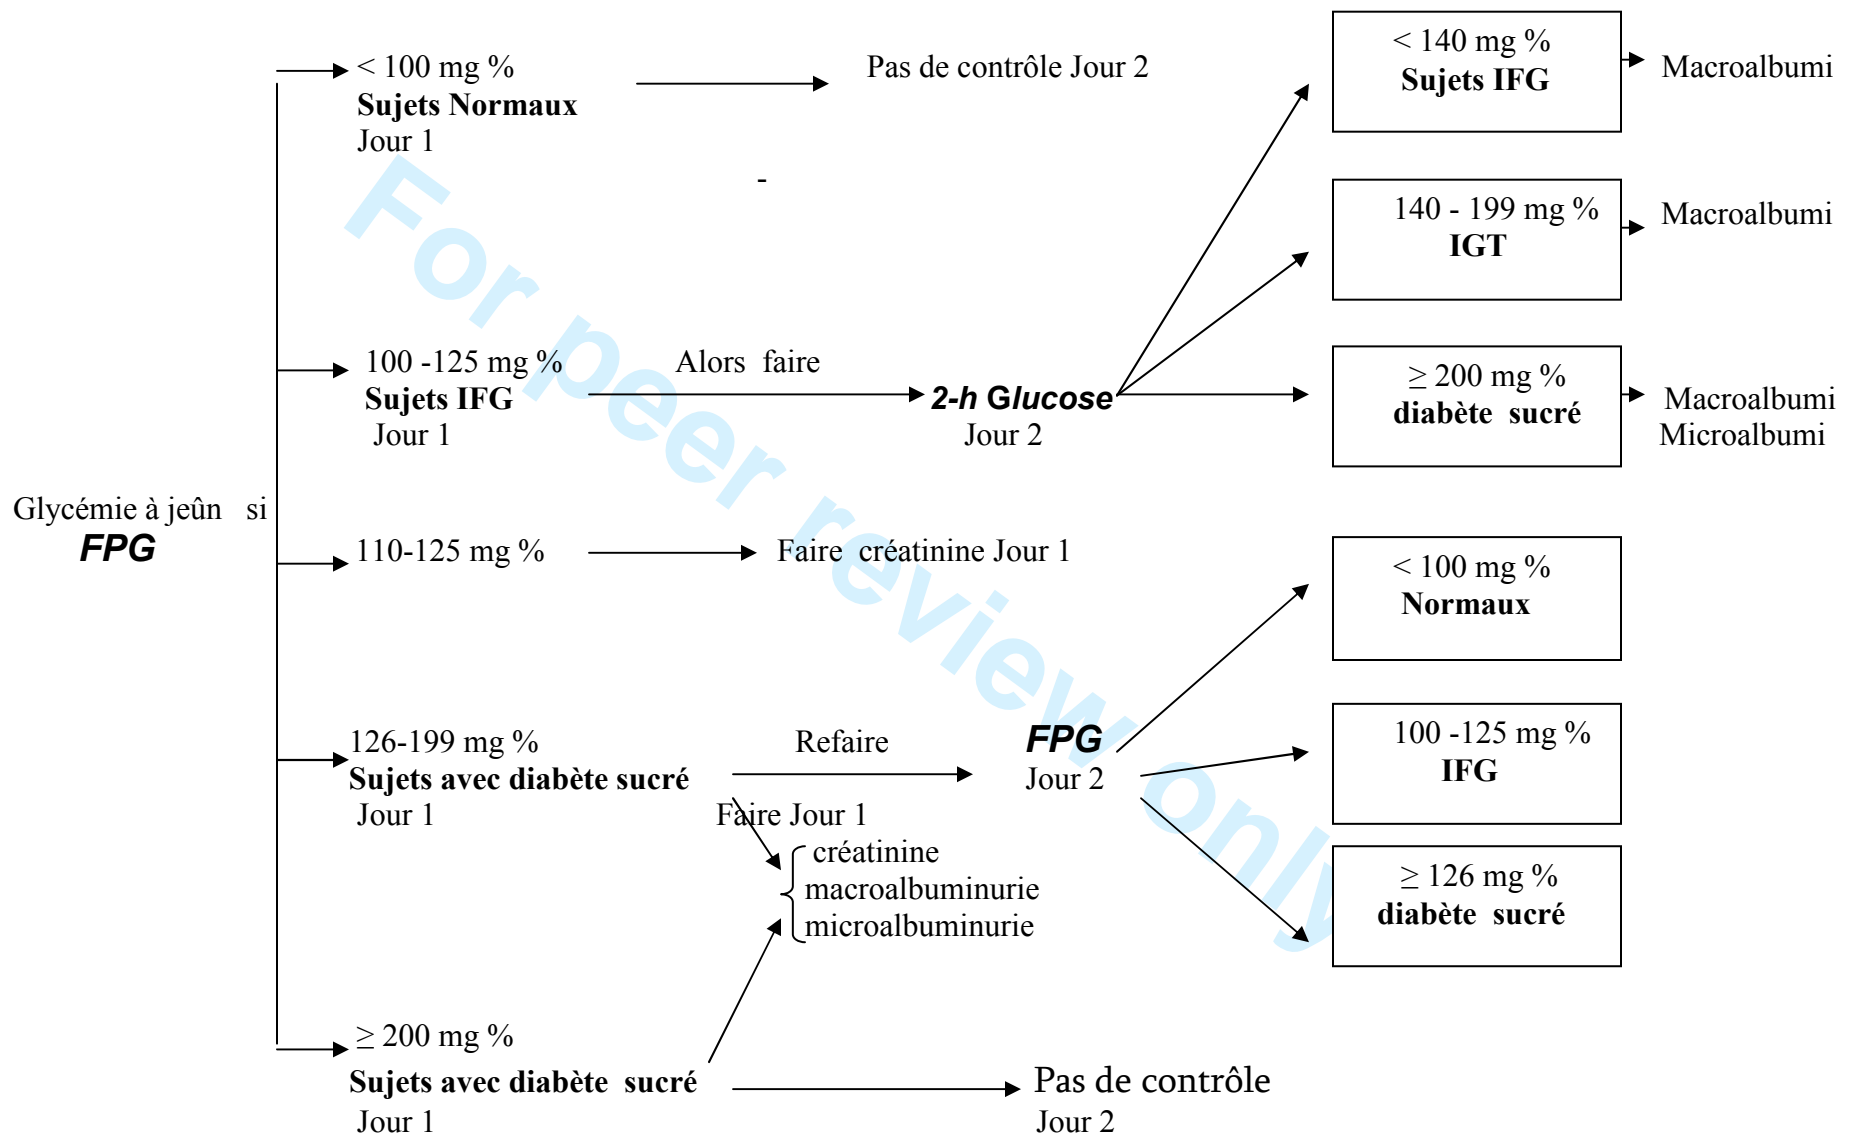

- 1  
2  
3  
4  
5  
6  
7  
8  
9  
10  
11  
12  
13  
14  
15  
16  
17  
18
- s'il y a antécédent d'une hypertension diagnostiquée qui sera vérifiée par la mesure de la PA ou déjà sous traitement.
  - pour le diabétique nous considérons comme PA élevée lorsque la valeur de la PS  $\geq 130$  mm Hg et la PD  $\geq 80$  mm Hg.
- ❖ La normoalbuminurie, la microalbuminurie (néphropathie diabétique latente) et la macroalbuminurie (néphropathie diabétique ouverte) sont définies par le rapport albuminurie / créatininurie correspondant respectivement à  $< 30$  mg/g, 30 à 299 mg /g et  $\geq 300$  mg/g (Sacks D. et al., 2002). L'insuffisance rénale sera définie par la formule de la clairance de la créatinine (CCr) sérique de Cockcroft-Gault (Cockcroft Dw et al., 1976) :

$$\frac{(140-\text{age}) \times \text{Poids}}{72 \times \text{créatinine mg /dl}} \quad (\times 0,85 \text{ si femme}) \quad \text{le poids en Kg et l'âge en année}$$

19  
20  
21  
22

La clairance normale sera  $\geq 90$  .ml / min (NKF, 2002).

Les stades de la MRC chez le sujet diabétique correspondent à :

- 23  
24  
25  
26  
27  
28  
29  
30  
31  
32  
33  
34  
35  
36  
37  
38  
39  
40  
41  
42  
43  
44  
45  
46  
47  
48  
49  
50  
51  
52  
53  
54  
55  
56  
57  
58  
59  
60
- STADE 1 : si au moins microalbuminurie avec  $\text{CCr} \geq 90$  .ml / min.
  - STADE 2 : lorsque  $\text{CCr}$  varie de 60-89 ml / min.
  - STADE 3 : lorsque  $\text{CCr}$  varie de 30-59 ml / min.
  - STADE 4 : lorsque  $\text{CCr}$  varie de 15-29 ml / min.
  - STADE 5 : lorsque  $\text{CCr} < 15$  ml / min
- ❖ La neuropathie dans notre étude sera périphérique et sensitive et concernera seulement les pieds, elle sera recherchée par le monofilament de Semmes-Weinstein 5,07. Nous considérerons comme déficit sensitif un résultat  $\leq 4 / 6$  avec risque d'ulcère et d'amputation. Ainsi nous aurons deux catégories, pied normaux et pied avec neuropathie sensitive avec risque.
- ❖ La rétinopathie sera définie par une atteinte des vaisseaux rétiens. Nous utiliserons la classification de la RD telle que proposée par l'International Clinical Diabetic Retinopathy and Diabetic Macular Edema Disease Severity Scales () :
1. Rétinopathie non apparente : pas d'anomalies du fond de l'œil.
  2. RD Non Proliférante (RDNP) minime: microanévrismes seuls
  3. RD Non Proliférante modérée : microanévrismes abondants mais moins que dans une RDNP sévère. Ici on a le stade précédent avec des exsudats secs, nodules cotonneux, hémorragies rétiniennes punctiformes.
  4. RD Non Proliférante sévère (rétinopathie préproliférante) : présence de des signes suivants : plus de 20 hémorragies intrarétiniennes dans chacun des 4 quadrants (hémorragies nombreuses en taches), modifications des veines (dilatées) dans plus de 2 quadrants ; pas de signes de RD Proliférative.
  5. RD Proliférante : un ou plusieurs des signes suivants : néovaisseaux pré-rétiniens, prépapillaires, plus ou moins étendus, hémorragie du vitré

ou pré-rétinienne, décollement de la rétine, glaucome néovasculaire. L'œdème maculaire est absent ou présent. Lorsqu'il est présent, il peut être minime (épaississement de la rétine ou exsudats durs au pôle postérieur mais distant du centre de la macula), modéré (lésions ci-dessus proches du centre de la macula mais n'affectant pas le centre), ou sévère (lésions affectant le centre de la macula : œdème diffus, cystoïde ou non cystoïde) ( ).

- ❖ Les femmes enceintes : en dehors des femmes ménopausées (âgées  $\geq 45$  ans ), toute femme avec une date de dernières règles  $\geq 1$  mois. Elles seront exclues de l'étude.
- ❖ L'invalide est défini comme celui qui n'est pas capable à cause d'un handicap mental (folie ) de venir aux sites. Il sera exclu de l'étude.

## 7.2. Type d'étude

Notre étude sera une étude analytique transversale ciblant les ménages.

## 7.3. Population d'étude

### 7.3.1. Les inclus

Le critère d'inclusion est l'âge de 20 ans et plus, tout sexe confondu étant donné que le risque de diabète chez les plus jeunes est minimal (Tableau 2). L'étude pilote de Kisantu en 2005 (Nguala E.B., 2005) montrant que la tranche d'âge de 20 – 29 ans constitue 34,37 % des diabétiques. Ainsi nous utiliserons une classification sur le mode optionnel proposée par l'OMS : à partir de 20 ans (Bonita R, 2001).

### 7.3.2. Les exclus

Les critères d'exclusion sont l'invalide et la grossesse qui a des critères de diagnostic différents. Il est conseillé de suspendre l'allaitement le jour où on applique la novésine, ainsi les femmes allaitantes seront exclues seulement de l'examen de la pression intraoculaire. Dans ce groupe il y a aussi les non-congolais, les non-résidents et les invalides.

## 7.4. Méthodes diagnostiques (ADA diagnosis, 2003)

Le diagnostic de diabète sera retenu sur la base d'une valeur de la glycémie à jeûn  $\geq 126$  mg/dl à deux reprises sur le sang capillaire ou d'une glycémie 2-h après prise orale de 75 g de glucose  $\geq 200$  mg %. Le prélèvement de sang s'effectuera après les mensurations. Le sujet sera instruit de ne rien manger après le repas du soir de la veille du prélèvement ( $\pm 8$  heures avant de se présenter (ADA diagnosis, 2003; Bonita R., 2001)

## 7.5. L'échantillonnage

### 7.5.1. Taille de l'échantillon

- La taille de l'échantillon,  $n$ , sera calculée selon la formule :

$$n = Z^2 pq / d^2 \times 1 / 1-f$$

$f$  = la fraction des non-réponses : 10 %

où  $Z$  sera égal à 1,96 (coefficient de confiance de 95 % au seuil de signification de 0,05).

$p$  = 0,05, correspondant à la fréquence trouvée en milieu hospitalier à Kimpese, alors qu'une étude de prévalence à Kisantu a rapporté une prévalence de 7%. Mais dans la plupart des pays le milieu rural présente une prévalence nettement moindre.

$q$  = 1 -  $p$  = 0,95

$d$  = 0,01 = le degré de précision souhaitée

$$\text{ainsi } n = (1,96)^2(0,05 \times 0,95) / (0,01 \times 0,01) = 1824 \quad 1824 \times 1 / 1-0,1 = 2025$$

- Comme les aires de santé ont des populations de taille différente, nous calculons d'abord la proportion de la population de chaque aire de santé.

Tableau n° 11 Population de Kisantu par aire de santé en janvier 2006.  
Echantillon proportionnel par aire de santé

| Aire de santé | Population totale | Proportion % | Echantillon proportionnel | Avenues |
|---------------|-------------------|--------------|---------------------------|---------|
| Nkandu        | 21 506            | 41,68        | 844                       | 164     |
| Kintanu 1     | 8 500             | 16,48        | 404                       | 44      |
| Kintanu 2     | 11 300            | 21,90        | 334                       | 46      |
| Kikonka       | 10 289            | 19,94        | 443                       | 81      |
| Total         | 51 595            | 100          | 2025                      | 335     |

Source : Bureau Central de la Zone de Santé de Kisantu, janvier 2006.

### 7.5.2. Technique d'échantillonnage

- ❖ L'échantillonnage se fera par quatre degrés et par aire de santé (Levy P.S., 1980).
  - Au premier degré : constitution des grappes (avenues). Dans chaque aire toutes les avenues (grappes) de tous les quartiers seront numérotées avec leur population.
  - Au deuxième degré : tirage systématique des parcelles dans chaque aire de santé après avoir listé et numéroté toutes les parcelles habitées dans les avenues. Le pas de sondage pour chaque aire de santé. (I)

sera le nombre de parcelles habitées de l'aire de santé (N) divisée par l'échantillon proportionnel (n).

$$I = N / n$$

Un nombre au hasard entre 1 et I constituera le départ du pas de sondage. Toutes les parcelles identifiées par le pas de sondage seront sélectionnées.

Tableau n° 12 Le pas de sondage dans les différentes aires de santé

| Aire de santé | Echantillon proportionnel requis |               | Nombre de parcelles habitées | Pas de sondage |
|---------------|----------------------------------|---------------|------------------------------|----------------|
| Nkandu        | 844                              | 200 ( UK)     | 529                          | (2,6) 1/2      |
|               |                                  | 644 (CS ETAT) | 2758                         | (4,2) 1/4      |
| Kintanu 1     | 404                              |               | 891                          | (2,2) 1/2      |
| Kintanu 2     | 334                              |               | 1819                         | (5,4) 1/5      |
| Kikonka       | 443                              |               | 983                          | (2,2) 1/2      |
| Total         | 2025                             |               |                              |                |

- Au troisième degré un tirage aléatoire simple des ménages sera fait par les enquêteurs sur place dans chaque parcelle après avoir listé tous les ménages.
- Au quatrième degré, dans chaque ménage nous tirerons au sort un sujet éligible jusqu'à totaliser l'échantillon (voir le tableau 4).

❖ Les sites de l'étude

La préférence de prendre des sites fixes se justifie pour éviter d'avoir à mobiliser trop de ressources tant humaines que matérielles. A domicile il est aussi souvent mal aisé de préserver l'intimité.

Le guide de l'OMS recommande d'avoir des sites fixes pour améliorer la précision dans les données (Bonita R., 2001).

Un autre élément en faveur du site fixe est que l'appareil pour la microalbuminurie exige de l'électricité pour son fonctionnement.

Pour une meilleure qualité et précision dans les données, il est souhaitable d'avoir des sites fixes ou le calibrage et la manipulation des appareils peuvent être fait avec plus de sûreté (exemple le tensiomètre à colonne de mercure).

Nous prendrons un centre de santé de l'état par aire de santé, mais pour l'aire de santé de Nkandu étant donné son importance en nombre d'individus deux sites seront choisis en l'occurrence un centre de santé de l'état et le rectorat de l'université Kongo. Ce qui fera un total de cinq sites.

La population des quatre aires de santé de la cité de Kisantu est répartie comme illustré dans le tableau 5.



Tableau n° 12 Centres de Santé de la cité de Kisantu par Aire de Santé

| Aires de santé | Centres de santé                       |
|----------------|----------------------------------------|
| Nkandu         | C.Santé d'Etat                         |
|                | Le rectorat de L'UNIVERSITÉ KONGO (UK) |
| Kintanu 1      | La cour de la paroisse Ste Famille     |
| Kintanu 2      | Cerphytoco                             |
| Kikonka        | C.Santé d'état                         |

N.B. Le rectorat de l'Université Kongo et la cour de la paroisse Ste Famille ont été choisies en postériori à cause de l'exiguité des locaux choisis initialement, le poste de santé de l'Université Kongo et le centre de santé de Kintanu 1.

## 7.6. Organisation de l'étude

### 7.6.1. Etat des lieux

L'équipe descendra sur terrain dans le but de :

1. Visiter les autorités politico administratives afin de les informer de l'étude et demander un ordre de mission pour toute l'équipe.
2. Vérifier la permanence de l'électricité (courant SNEL ou groupe électrogène).
3. Vérifier la permanence de l'eau (régideso ou existence de réservoirs d'eau ).
4. Vérifier l'état des latrines
5. Vérifier l'infrastructure et l'espace en dehors des locaux.
6. Vérifier la faisabilité du circuit du sujet.
7. Contacter un menuisier pour la construction des box.
8. Préparer la location des chaises

### 7.6.2. La sensibilisation

Elle sera effectuée par le MCZS et une équipe de 10 relais communautaires qui seront repartis en 5 équipes de 2 (une par aire de santé). Ils utiliseront les mégaphones en sillonnant les rues chaque soir pendant que tout le monde est supposé être à domicile (annexe 4 le message de sensibilisation). Une banderole a été installée à Kintanu déchirée le même soir par le passage d'un camion. d'opinion (chef des églises, chef des Elle s'étendra une semaine avant le début de l'enquête et se poursuivra jusqu'à la fin de l'enquête pour rappeler aux sujets le lieu du site et récupérer les sujets absents à domicile. En même temps que se fera la visite dans les ménages une forte sensibilisation de la population se déroulera à travers les églises, les chefs de quartiers etc.

### 7.6.3. La formation

#### *La formation ophtalmologique*

Elle sera couplée d'une visite sur l'état des lieux. La formation se donnera en un jour par le Dr. Mvitu . La théorie sur l'AV sera suivie d'exercices avec évaluation du temps des

examens (chaque participant devra examiner 10 AV). Un apprentissage du questionnaire ophtalmologique aussi sera fait.

Les participants ont été un infirmier de l'hôpital Saint-Luc déjà formé en ophtalmologie auquel se sont joint un infirmier choisi par centre de santé. Pour le poste de l'U.K. où il n'y a qu'une seule infirmière un infirmier a été affecté par la zone de santé.

Ainsi au total les infirmiers ophtalmologiques travaillant dans l'étude étaient à 6 (un ancien et 5 nouveaux).

Pendant que se fera la formation, les docteurs Makulo et Muyer feront une visite au MCZS pour mettre au point certains détails de l'enquête (le recrutement des enquêteurs, la logistique, la préparation de la formation générale, le prétest et les modalités de l'étude). Les 2eme et 3eme jours ils feront l'état des lieux avec le Dr Mvitu.

#### *La formation générale*

Dix enquêteurs seront recrutés parmi les infirmiers des centres de santé choisis comme sites et 30 parmi les infirmiers en chômage. Quelques jours avant la collecte de données, ils suivront une formation de 3 jours (annexe 5) qui comprendra le diabète, la technique d'interview, l'anthropométrie (poids, taille, tour de taille) la prise de la tension artérielle, les examens d'ophtalmologie et le remplissage du questionnaire. Le prélèvement de sang sera effectué par les laborantins qui suivront une orientation par rapport à l'étude.

Un test a permis de sélectionner les enquêteurs à 25.

#### 7.6.4. Le relevé parcellaire

Il s'est fait en 5 jours en procédant aire par aire, commençant par Nkandu, Kintanu 1, Kintanu 2, Kikonka et le dernier jour les villages de Kikonka et de Nkandu. Toute l'équipe était ensemble sur le même site et suivaient la fiche de relevé parcelle (annexe n°6). Le premier jour les superviseurs étaient à 3 et les autres jours à 2. Le nombre d'avenues étaient attribuées aux enquêteurs selon la rapidité de travail de chacun.

Dans chaque aire de santé, chaque équipe s'avancera avenue par avenue et désignera à chacun son nombre d'avenues de travail. Au fur et à mesure chacun restera à son lieu d'affectation et commencera son travail.

Le contrôle de qualité était obtenu premièrement par la passage des superviseurs dans quelques avenues et deuxièmement lors de l'identification des cibles les enquêteurs se sont vus attribués d'autres avenues que premièrement.

#### 7.6.5. Le prétest

Le prétest aura pour but d'identifier tous les écueils, d'aider le personnel à avoir la maîtrise des tâches, de sélectionner le personnel performant, de corriger le questionnaire, d'évaluer le circuit proposé aux sujets et de vérifier l'acceptabilité de la population. Il concernera l'interview, les mensurations, les examens biologiques et ophtalmologiques et sera organisé après le relevé parcellaire sous le contrôle de tous les superviseurs. Tous les enquêteurs y seront. Il se fera dans un quartier non sélectionné pour l'enquête à Madimba au Centre Cederi et concernera un échantillon de 110 individus. Comme le relevé parcellaire n'a pas été fait, le pas de sondage a été choisi de façon aléatoire 1/5.

1  
2  
3 L'enregistrement des sujets (annexe 7) pendant leur identification en suivant le pas de  
4 sondage prévu pour l'enquête définitive avec lecture du formulaire de consentement  
5 éclairé interviendra la veille. On donnera une carte de rendez-vous (annexe 8) aux sujets  
6 en leur demandant de venir tous le matin à 7 h.

7  
8 Après le travail une réunion d'évaluation de la journée sera organisée entre les  
9 superviseurs et toute l'équipe pour revoir les difficultés, faire des suggestions et proposer  
10 des corrections.

11 Les résultats obtenus seront analysés par l'équipe des superviseurs et des coordonnateurs  
12 et retransmis aux enquêteurs deux jours après.

13  
14  
15 Un premier prétest a eu lieu pendant la pluie et n'a reçu que 54 sujets. Ce qui a  
16 occasionné un deuxième prétest qui a corrigé les failles du premier prétest, la non  
17 maîtrise du questionnaire par les enquêteurs, le non respect du jeûn par les sujets, la  
18 modification du circuit des données en faisant passer l'examen de glycémie et de  
19 créatinine juste après la réception des sujets pour respecter le jeûn, la modification de  
20 certaines questions du questionnaire.

#### 21 22 23 7.6.6. L'identification des cibles

24  
25  
26 Cette étape a duré au total 6 jours. Les enquêteurs ont fait l'identification de leurs sujets  
27 dans certaines avenues différentes de celles où ils ont fait le relevé parcellaire pour  
28 contrôler le travail fait par les autres et une partie dans les mêmes avenues.

29 Ils se présenteront munis de leur ordre de mission. L'identification était effectuée avant  
30 l'enquête aire par aire en suivant la procédure du relevé parcellaire. Tous les enquêteurs  
31 sillonnaient l'aire de santé contrôlés par les superviseurs. L'identification des sujets se  
32 faisait en une journée de 8 h – 17 h 30 sauf l'aire de Nkandu qui a pris deux jours.

33 Dans chaque aire de santé des cartes de rendez-vous seront donnés aux enquêteurs à  
34 distribuer aux sujets. Ces jetons contiennent la mention du jour pour un site fixe (Bonita  
35 R., 2001) pour passer l'interview, les mensurations et les prélèvements de sang.. Tous les  
36 sujets étaient conviés à se présenter le matin à 7 h, mais en pratique ils ne venaient pas au  
37 même moment. Ces jetons seront de couleurs différentes représentant la couleur d'un  
38 jour. L'exemple de carte se trouve à l'annexe n°7. L'enquêteur reportera les  
39 renseignements du jeton avec l'identité du sujet (la date de naissance, le nom, le sexe et  
40 l'adresse) sur une fiche d'enregistrement à sa portée (annexe n° 8). Ils en profiteront pour  
41 sensibiliser les sujets à adhérer à l'étude. Pour situer ceux qui ne connaissent pas leur âge,  
42 quelques points de repères ont été fixés, par exemple la date de l'indépendance, l'âge du  
43 premier enfant, l'année du mariage etc... Sur la liste d'identification les noms seront  
44 ensuite codés.

45  
46  
47  
48  
49 Cette même fiche servira pour recevoir et identifier le sujet dès son arrivée sur le site. Les  
50 enquêteurs se serviront des données du relevé parcellaire où ils auront identifié les  
51 parcelles habitées. La sélection des parcelles à visiter aura été faite par les superviseurs.  
52 Dans chaque parcelle les ménages seront identifiés et numérotés sur un jeton. Dans ceux-  
53 ci un des habitants de la parcelle tirera au sort un jeton. Dans chaque ménage on  
54 procédera de façon identique et un individu éligible sera sélectionné (§ 7.3.1. et 7.3.2.).  
55  
56  
57  
58  
59  
60

Si le sujet est absent les enquêteurs reviendront après ou le lendemain et mentionneront cette absence sur le relevé par un signe. En cas de refus en mentionner la cause sur la fiche et accentuer la sensibilisation en utilisant les relais communautaires, les leaders d'opinion, faire ou le superviseur, faire au moins 3 tentatives. Si l'échec persiste refaire le tir au sort. Si l'individu élu ne remplit pas les critères, le tirage au sort sera refait. Si dans une parcelle il n'y a pas d'individus éligibles cette parcelle sera sautée et la suivante sera prise.

La codification des noms se fera le soir par l'équipe, en attribuant à chaque nom un code précis et en le recopiant sur leur formulaire de consentement éclairé.

#### 7.6.7. La collecte de données

Elle a débuté par les aires de santé les plus lointaines, Kikonka, Kintanu 2, Kintanu 1, Nkandu UK, Nkandu Etat.

Toute la collecte sera chaque fois concentrée dans un seul site où tous les enquêteurs et superviseurs seront ensemble pendant 3 à 4 jours comme décrit dans le tableau 14. Après toute l'équipe se déplacera vers un autre site. Pendant ce temps le travail habituel au sein du site continue avec leurs malades.

Quelques enquêteurs avec un superviseur accueillaient les sujets tandis que les autres faisaient l'identification sur le site suivant.

A la fin de l'enquête un jour de récupération a été ajouté pour l'aire de santé de Kikonka. Au total 20 enquêteurs (les 5 restants serviront de réserve) et 5 infirmiers des centres de santé seront présents sur le site.

Les avantages de travailler dans un site à la fois sont de permettre une meilleure supervision des activités, de diminuer les courses du véhicule, de rendre plus aisé le travail des deux ophtalmologues.

Les inconvénients sont l'espace restreint et pour cela la solution sera d'ajouter des box à l'extérieur. L'encombrement des gens sur le site sera aussi à redouter avec le risque d'impatience.

Une collation devra aussi être octroyée pour les motiver (un pain et des arachides). Pour parer à une éventuelle malveillance de la population, des rencontres avec les leaders d'opinion seront organisées.

Tableau n°14 Nombre de jours par site lors de l'étude de Kisantu

| Aires de santé   | Nombre attendus | Nombre de jours |
|------------------|-----------------|-----------------|
| Kikonka          | 443             | 5               |
| Kintanu 2        | 334             | 3               |
| Kintanu 1        | 404             | 3               |
| Nkandu Gare (UK) | 200             | 1               |
| Nkandu Etat      | 644             | 3               |
| Total            | 2025            | 15              |

L'enquête a duré 15 jours.

1  
2  
3 Le circuit du sujet est schématisé dans la figure n° 3 (ce sera mieux explicité par les  
4 photos)

5 L'horaire de travail était de 8 h à 15 h. Une petite pause permettait à l'équipe de prendre  
6 une collation à tour de rôle.  
7  
8  
9  
10  
11  
12  
13  
14  
15  
16  
17  
18  
19  
20  
21  
22  
23  
24  
25  
26  
27  
28  
29  
30  
31  
32  
33  
34  
35  
36  
37  
38  
39  
40  
41  
42  
43  
44  
45  
46  
47  
48  
49  
50  
51  
52  
53  
54  
55  
56  
57  
58  
59  
60

Figure n° 3 Flux des sujets pendant l'étude de prévalence du diabete a Kisantu de 8 h -17 h

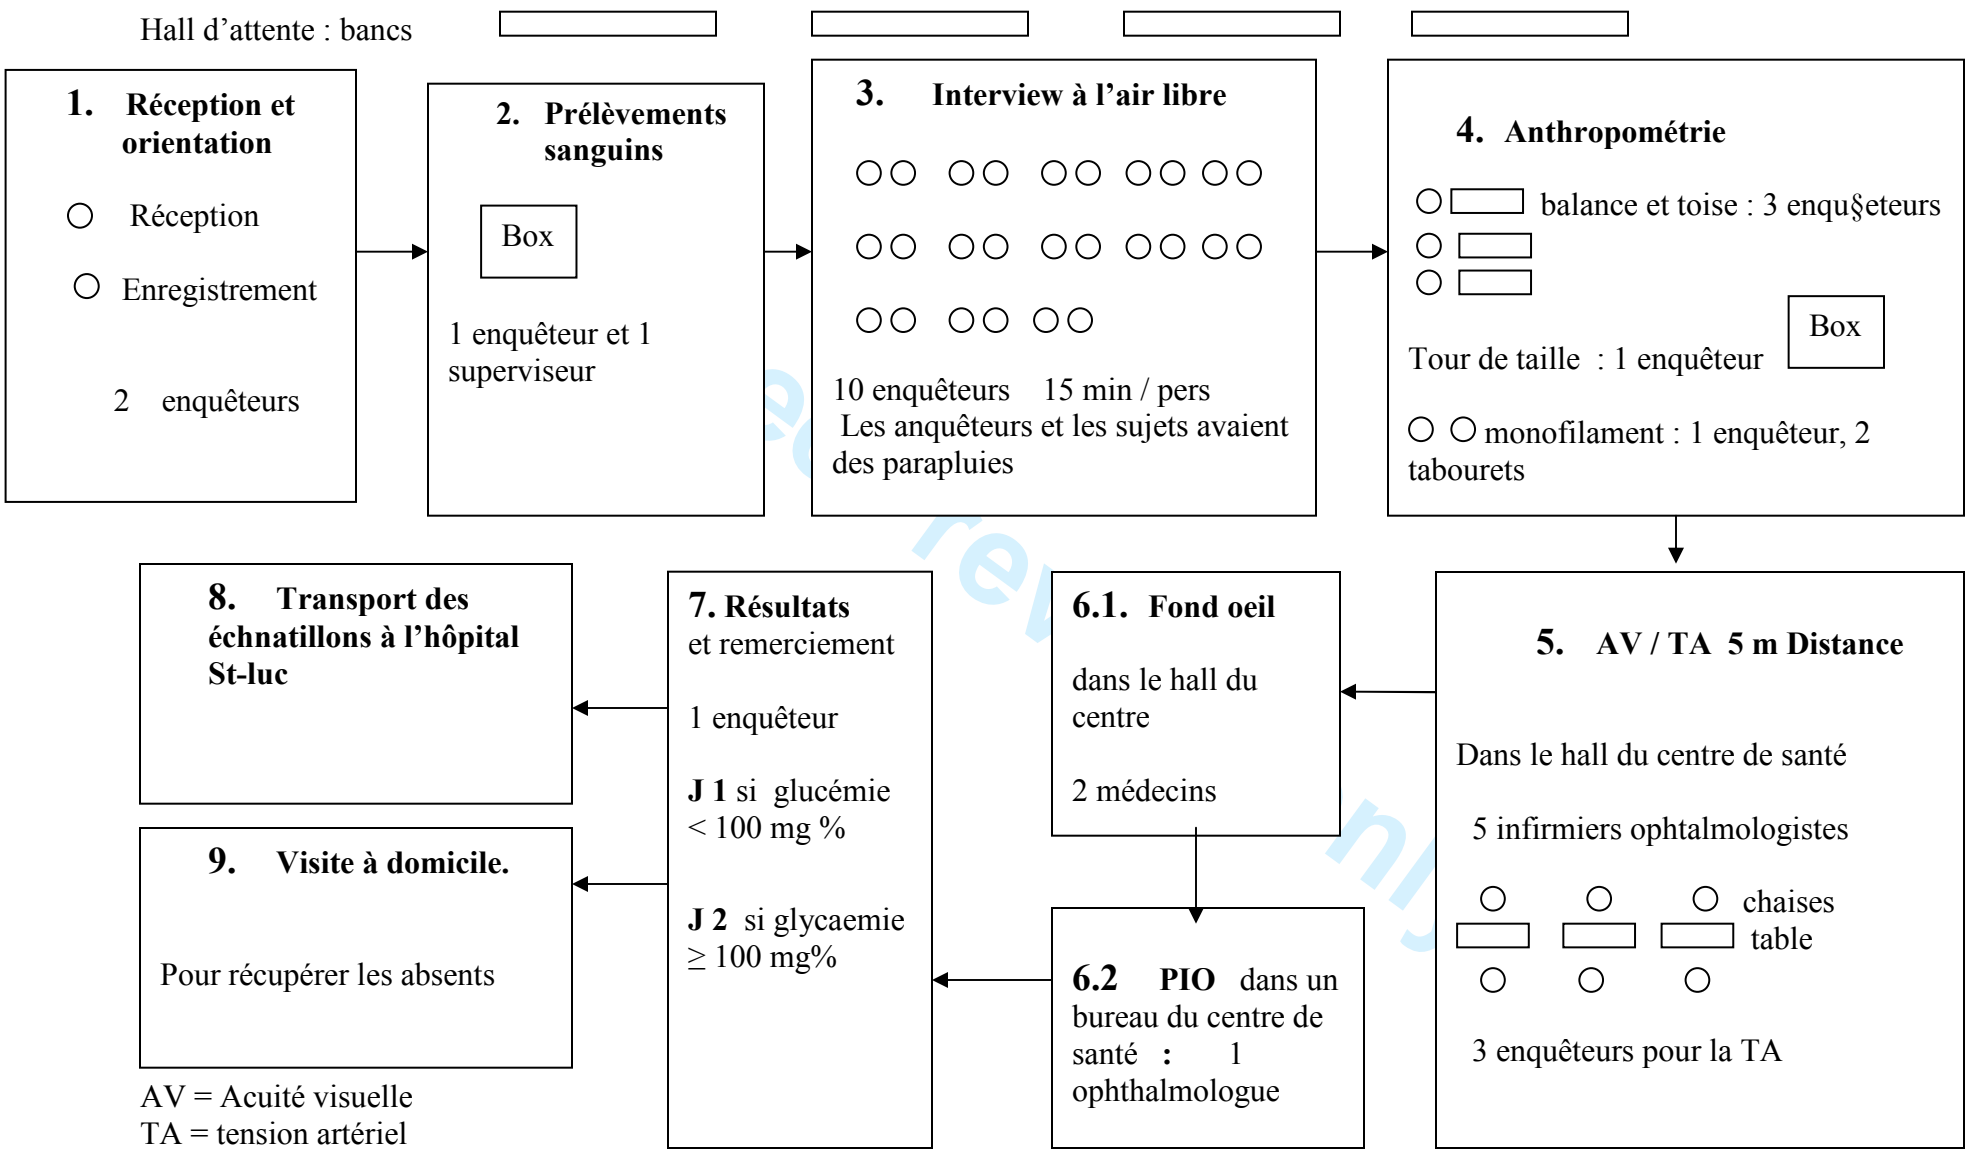

1  
2  
3 Après le travail sur le site commence les visites à domicile pour récupérer les absents.  
4 Quelques-uns des enquêteurs et des infirmiers après le service effectueront cette tâche.  
5 Une motivation sera donnée aux sujets pour les aider à patienter  
6  
7

### 8 Etape1. La réception

9  
10 Des l'arrivée 2 enquêteurs reçoivent les sujets, les orientnt, vérifient leur nom sur la fiche  
11 d'enregistrement constituée lors de l'identification des cibles et cherche le questionnaire  
12 du sujet qu'ils acheminent aux enquêteurs chargés de l'étape 2.  
13  
14

### 15 Etape 2. Les prélèvement de sang pour la glycémie, la créatinine, l'OGTT 16 et le prélèvement des urines.

17  
18 Le dosage de la glycémie sera effectué par 1 enquêteur chez tous les sujets. Le  
19 prélèvement du sang capillaire sera réalisé au niveau du doigt sur un sujet à jeûn depuis la  
20 veille à 22 h (au moins 8 heures sans rien manger ni rien boire sauf l'eau plate (Bonita R,  
21 2001). Les patients sous traitement autre que les antidiabétiques prendront leurs produits  
22 (Bonita R, 2001). Les tests seront le FPG à faire à l'aide d'un glucomètre de marque  
23 Glucocard X Meter.L. Un examen de contrôle sera fait le lendemain (Figure 2) De même  
24 que les sujets n'ayant pas jeûné devront faire leur premier examen le lendemain (Bonita  
25 R, 2001).  
26  
27

28 Le calibrage des appareils : de nombreuses causes d'erreurs dans la manipulation des  
29 appareils de glycémie incitent à la prudence dans l'interprétation des résultats (Declerk,  
30 2000). Ainsi chaque matin les glucomètres doivent être calibrés.  
31  
32

33 La macroalbuminurie sera un examen semi-quantitatif fait avec le combi 9 tests qui  
34 dosent à la fois l'albuminurie, l'hématurie, les leucocytes, les nitrites, la glycosurie, le  
35 PH. Le malade donnera 5 cc d'urine dans laquelle sera plongée une bandelette pour la  
36 protéinurie. On compare la couleur obtenue à un étalon et la valeur est exprimée sous  
37 forme de +. Une + équivaut à une albuminurie < 30 mg %, + + entre 30 à 99 mg %, +++  
38 entre 100 à 500 mg %, ++++ à > 500 mg %. Un individu normal ne doit pas avoir de  
39 protéine dans les urines. Le critère d'exclusion sera les menstruations chez la femme, car  
40 le sang contient des protéines. Cet examen sera fait chez ceux qui auront une glycémie  
41 glycémie  $\geq$  100 mg %.  
42  
43  
44

45 La microalbuminurie sera faite avec l'appareil DCA 2000 Bayer sur 5 cc d'urine . Cet  
46 examen concernera ceux qui auront une glycémie  $\geq$  100 mg %. le 1<sup>er</sup> jour.

47 Il permettra de diagnostiquer la phase de néphropathie débutante : stade 3. Sa valeur sera  
48 30–299 mg .  
49  
50

51 La créatinine sera dosée sur du sang veineux par le laborantin immédiatement après la  
52 glycémie chez ceux qui auront une glycémie  $\geq$  110 mg %. Sera considéré comme  
53 normale une valeur de 0,5 à 1,5 mg %. Les échantillons seront prélevés dans de tubes à  
54 essai, gardés dans des boites isothermes jostyl et acheminés au laboratoire de l'hôpital  
55 Saint Luc de Kisantu le jour même. L'intérêt de ce dosage est de rechercher le degré de  
56 l'insuffisance rénale, car la microalbuminurie permet de voir seulement l'atteinte  
57  
58  
59  
60



1  
2  
3 rénale. Sur chaque échantillon inscrire le n du code, la date du prélèvement, le centre de  
4 santé  
5

6  
7 L'autre test sera la glycémie 2 h – après une charge de 75 g glucose qui sera fait au jour 2  
8 par le laborantin a partir de 8 h. Le sujet prendra par voie orale 75 g de glucose anhydre  
9 dans 250 ml d'eau. Après 2 h une glycémie capillaire sera prélevée. Cet examen sera fait  
10 chez les individus avec une glycémie entre 100 mg % et 125 mg %.  
11

12  
13 Tous les examens d'urine seront faits par le docteur Makulo au cours du jour 1 (installé  
14 au laboratoire).  
15

### 16 Etape 3. L'interview

17  
18 Ce sera une interview structurée et dirigée, utilisant un questionnaire écrit ayant des  
19 questions fermées à assurer par une équipe de 10 enquêteurs installés à l'air libre sous des  
20 parapluies.  
21

22 Elle portera sur les antécédents familiaux de diabète, d'hypertension et obstétricaux, la  
23 nourriture ingérée, la consommation d'alcool et de tabac. D'autres informations, telles  
24 que l'occupation, l'état matrimonial, les caractéristiques démographiques seront  
25 ajoutées. et les antécédents du sujets.  
26  
27

### 28 Etape 4. L'antropométrie

29  
30 Trois enquêteurs procéderont aux mensurations de la taille, du poids, ils feront cela à  
31 tour de rôle sur 3 balances et 3 toises. Ils prendront le tour de taille dans un box.  
32  
33

34 La taille sera prise avec une toise. Le sujet devra se déchausser et avoir sa tête nue  
35 (enlever chapeau, casquette, serre-tête, ruban... ). Il se mettra debout sur une surface  
36 plane, les pieds joints, les talons, les mollets, le derrière et les épaules appliqués contre  
37 une surface verticale (toise). Il regardera droit devant lui, le regard parallèle au sol. La  
38 mesure sera lue avec une précision au 0,1 centimètre (Bonita R, 2001).  
39  
40

41 Le poids sera mesuré avec une balance électronique de marque seca graduée de 0-150 kg.  
42 Elle devra être calibrée chaque jour et utilisée par la même personne. Elle sera placée sur  
43 une surface plate. Le sujet sera habillé légèrement et déchaussé. Le poids sera lu avec une  
44 précision de 0,10 kg.  
45  
46

47 Le tour de taille sera mesuré à l'aide d'un mètre-ruban de marque Fournier sera exprimé  
48 en centimètre, lu au 0,1 cm. Pendant la mesure, le sujet sera debout, les pieds joints. Le  
49 mètre-ruban sera placé horizontalement, à mi-chemin entre le rebord inférieur de la 12<sup>ème</sup>  
50 cote et la crête iliaque sur la ligne axillaire. La mesure sera prise à la fin d'une expiration  
51 normale sur la peau ou des vêtements légers, les bras étant en position relâchée de chaque  
52 côté du corps (Bonita R, 2001).  
53  
54

55 Un autre enquêteur fera l'examen au monofilament. L'examen au monofilament en nylon  
56 de 5,07 (=10 g) de Semmes-Weinstein consistera à placer le monofilament verticalement  
57  
58  
59  
60



1  
2  
3 par rapport a la surface de la peau face plantaire et dorsale du pied en formant un "C".  
4 Le contact avec le filament doit durer 1 à 2 secondes. Si le patient ne sent pas le filament  
5 on peut conclure à un déficit sensitif. L'examen sera noté "1" pour chaque point prédéfini  
6 sur la photo si la sensation est là et "0" si elle n'existe plus. A la fin pour chaque pied le  
7 total sera établi par rapport aux 6 points.  
8  
9

10 Dr Makulo supervisera cette étape en attendant les échantillons d'urine. Le Dr Muyer  
11 passera de temps en temps pour contrôler.  
12

#### 13 14 Etape 5. La prise de l'acuité visuelle et de la tension artérielle 15

16 L'acuité visuelle (AV) de loin sera mesurée pendant les 5 minutes de repos de la prise de  
17 la tension artérielle à l'aide des optotypes pour les sujets qui savent lire et à l'aide du E –  
18 test pour ceux qui ne savent pas lire. Les sujets seront placés à 5 m du tableau des  
19 optotypes. Les tableaux d'optotypes seront présentés sous forme de cartons à accrocher  
20 au mur. L'acuité visuelle de 10 / 10 sera considérée comme normale pour chaque œil.  
21 L'examen commencera toujours par l'œil droit. L'acuité visuelle de près sera mesurée à  
22 l'aide du test de Parinaud. Cet examen sera fait par l'infirmier.  
23  
24

25  
26 Pendant que le sujet sera assis, la T.A. se prendra juste avant et après la prise de l'A.V.  
27 Ainsi 5 infirmiers ophtalmologiques avec 3 infirmiers travailleront côte à côte dans le  
28 hall du centre de santé.  
29

30 La tension artérielle (TA) sera mesurée à l'aide d'un tensiomètre à mercure. Elle sera  
31 mesurée deux fois, en mm de Hg (Bonita R., 2001; WHO, 1999). Le sujet sera en  
32 position assise sans croiser les jambes. Elle se prendra sur le bras droit, nu, après avoir  
33 établi un contact avec le sujet, et après 5 minutes de détente du sujet. Après avoir  
34 complètement dégonflé le brassard, laisser le bras se reposer pendant une minute et  
35 refaire une deuxième prise après 5 minutes. Sera retenu la moyenne des deux TA. Si la  
36 différence entre les deux lectures est  $\geq 10$ mm Hg, une troisième lecture est nécessaire  
37 (Bonita R, 2001). Les malades hypertendus peuvent prendre leurs médicaments le matin  
38 ((Bonita R), 2001,.  
39  
40  
41

#### 42 43 Etape 6. Examen du Fond d'œil et de la P.I.O. 44

45 Le fond d'œil (FO) sera examiné par le Dr Mvitu ou Kimenwembwe au jour 1 dans le  
46 hall du centre de santé 10 à 15 minutes après instillation d'une goutte de mydriaticum  
47 dans chaque œil qui sera donnée à l'étape 5 après la prise de l'acuité visuelle. L'examen  
48 concernera ceux qui avec une glycémie  $\geq 100$  mg %.

49 Il s'agira d'un fond d'œil direct à l'aide d'un ophtalmoscope de marque Heine Beta 2000.  
50 Cet examen décrira l'état de la rétine et notera la présence ou non d'une lésion de  
51 rétinopathie ou autre.  
52

53  
54 La mesure de la pression intraoculaire (PIO) sera faite à l'aide du tonomètre de Shiotz  
55 en position assise et puis du Perkins en position couchée après instillation d'une goutte  
56 anesthésique. Cette goutte sera mise suivie immédiatement d'une goutte de mydriaticum.  
57  
58  
59  
60

Une mesure sera faite pour l'œil droit et une mesure pour l'œil gauche. La PIO normale est inférieure à 21 mm Hg.

Cette étape utilisera deux médecins ophtalmologiques.

### Etape. L'examen de Fond d'œil par l'infirmier de l'hôpital Saint-Luc

L'infirmier (Grégoire) déjà formé en ophtalmologie fera les examens de fond d'œil après dilatation préalable avec le mydriaticum. L'examen sera fait chez un sujet sur cinq qui a une glycémie normale. Ceci pour évaluer ses performances.

Cette partie est pour l'ophtalmologue.

### Etape 7. La remise des résultats

A la fin l'enquêteur avec le Dr Manja remercieront gentiment les sujets et leur délivreront leurs résultats au jour 1 pour le groupe avec glycémie < 100 mg % et au jour 2 pour les autres. Les résultats porteront sur l'AV, la TA, le tout de taille pour les obèses, l'examen du monofilament, la glycémie, le FO et la PIO. Ils orienteront le sujet si il est référé à l'Hôpital.

### Etape 8. Les examens à l'hôpital Saint-Luc

Le Dr Makulo accompagnera les échantillons 1 X / J à St Luc. Le transport de ceux-ci se fera l'après-midi.

Le laborantin remplira un registre pour la créatinine

| Date | Code | N fiche | Centre de santé | Résultat |
|------|------|---------|-----------------|----------|
|      |      |         |                 |          |

Chaque soir le laborantin renverra le registre.

La durée d'un sujet sur le site

| Activités                | Catégories de sujets                      | Jour 1 | Jour 2 |
|--------------------------|-------------------------------------------|--------|--------|
| Réception                | Sujets normaux                            | min    |        |
| Examens de sang et Urine |                                           | min    |        |
| Interview                |                                           | min    |        |
| Mensurations             |                                           | min    |        |
| AV / TA                  | Sujets avec hyperglycémies intermédiaires | min    |        |
| F.O./ PIO                |                                           |        |        |
| Resultat                 |                                           | min    |        |

|                            |  |     |  |
|----------------------------|--|-----|--|
| Transport des échantillons |  | min |  |
| Visite à domicile          |  |     |  |

Il faut réajuster ce timing en incluant le temps pour le déplacement des sujets

### Etape 9. La récupération des absents

Après le travail, quelques enquêteurs avec les relais communautaires sont envoyés pour récupérer les absents et leur donner rendez-vous le lendemain. Les autres jours d'autres équipes seront envoyées.

Tableau n° ... La récupération des sujets sur les sites

| Aires de santé   | Nombre de jours |
|------------------|-----------------|
| Kikonka          | 2               |
| Kintanu 2        | 2               |
| Kintanu 1        | 1               |
| Nkandu Gare (UK) | 1               |
| Nkandu Etat      | 1               |
| Total            | 7               |

#### 7.6.8. La mise en œuvre

- Les ressources humaines, l'équipe de recherche

#### **Les encadreurs**

Les encadreurs étaient tous les professeurs de l'université de Kinshasa qui sont venus à deux reprises pour voir ce qui se passait sur terrain.

#### **Les superviseurs**

L'enquête sera placée sous la supervision d'un chef d'équipe (l'investigateur) le docteur Muyer, spécialiste en santé publique avec la collaboration de quatre superviseurs, trois autres médecins, les docteurs Makulo, néphrologue et Mvitu et Kimenuembwe, tous deux en ophtamologie et le docteur Mandja, spécialiste en santé publique.

Leurs tâches seront de former les enquêteurs, chaque jour de faire le tour de toutes les étapes pour veiller à la bonne marche des activités et relever les difficultés rencontrées. Chaque soir l'équipe des superviseurs se réunira pour faire le point de la situation, revoir la complétude et la cohérence des données et préparer la journée du lendemain.

L'investigateur participera à la formation, elle veillera au relevé parcellaire, au prétest, à l'identification des cibles, au bon déroulement de toutes les étapes de l'enquête en passant de l'une à l'autre et à la gestion du matériel.

1  
2  
3  
4 Les docteurs Mvitu et Kimenyembwe superviseront le travail effectué par les infirmiers.  
5 Les médecins consulteront aussi tous les malades diabétiques, les IFG , les IGT.  
6  
7

### 8 **Les sensibilisateurs**

9

10 Le médecin chef de la Zone de Santé de Kisantu mettra à disposition son réseau de relais  
11 communautaires (agents de la communauté travaillant avec la Zone de Santé pour aider à  
12 la sensibilisation de la communauté).  
13

### 14 **Les enquêteurs**

15

16 Ils seront choisis parmi les infirmiers en chômage au nombre de 30. Après évaluation 25  
17 seront sélectionnés parmi lesquels 5 serviront de réserve. Les infirmiers seront un par  
18 centre de santé.  
19

20 Leur tâche sera de faire le relevé parcellaire des avenues sélectionnées pendant deux  
21 jours. Ensuite ils feront l'identification et le recrutement des sujets en passant de porte en  
22 porte. En cas d'indisponibilité des sujets ils reviendront deux fois si nécessaire pour  
23 diminuer les non-réponses (Bonita R, 2001). Si dans un ménage il n'y a pas d'individus  
24 éligibles ce ménage sera sauté et on tirera un autre au sort. Pendant l'enquête ils aideront  
25 les infirmiers à l'interview, dans les mensurations et les examens de glycémie.  
26

27 Les enquêteurs seront évalués pendant la formation par des exercices et un tes. Un  
28 contrôle de qualité sera fait par l'investigateur après le relevé parcellaire, l'identification  
29 des sujets et l'examen de glycémie.  
30

31 Les infirmiers feront les examens de glycémie en collaboration avec le laborantin.  
32

33 Les infirmiers de chaque site seront recrutés 1 par centre par leur infirmier titulaire.  
34

### 35 **Les laborantins**

36

37 Il y en aura un par centre. Ils aideront aux différents prélèvements Un contrôle de qualité  
38 sur quelques examens de glycémie sera fait par l'investigateur dans chaque site.  
39

40 Le chef du laboratoire de St Luc veillera à assurer la permanence dans son service.  
41

- 42
- 43 □ La mise en place du matériel

44

45 L'équipe des superviseurs arrivera la veille à Kisantu pour mettre en place toute  
46 l'organisation.  
47

48 Toute l'équipe sera concentrée sur le site pendant 3 ou 4 jours. Des bâches pour protéger  
49 contre le soleil ou la pluie seront installées dans la cour ou bien si celle-ci est trop petite  
50 dans une parcelle voisine ou un terrain proche. Différents box contenant des tables et des  
51 chaises seront créés pour recevoir les sujets. Les box seront isolés par des etokos (nappe).  
52 Des bancs seront installés pour recevoir les sujets dès leur arrivée.  
53

54 Le matériel sera gardé par l'investigateur à son lieu d'hébergement. L'infirmier titulaire  
55 aura pour tâche de gérer le matériel utilisé dans son site.  
56

57 A la fin de l'enquête le matériel restera la propriété des centres de santé qui en signeront  
58 un accusé de réception sauf les bâches qui appartiennent au Dr Makulo.  
59  
60

□ Les ressources matérielles

Pour la formation

| Matériel        | Quantité |
|-----------------|----------|
| Lap top         | 1        |
| Rallonge        | 1        |
| LCD             | 1        |
| Lancettes       | 10       |
| Ouate           | 100 gr   |
| Alcool denature | 1 flacon |
| Tigettes        | 10       |
| Glucomètre      | 5        |
| Tensiomètre     | 5        |
| Mètre ruban     | 5        |
| Balance         | 5        |
| Toise           | 5        |

Pour le pretest

| Produits        | Quantité   |
|-----------------|------------|
| Tigettes        | 35         |
| Lancettes       | 35         |
| Myriaticum      | 10         |
| Novesine        | 10         |
| Tensiomètre     | 4          |
| Sthethoscope    | 4          |
| Balance         | 6          |
| Metre ruban     | 4          |
| Glucometre      | 2          |
| Tigettes        | 35         |
| Glucose anhydre | 10 X 75 gr |

Pour l'enquête

| Matériel                                    | Quantité |
|---------------------------------------------|----------|
| Glucosé hypertonique 50 % flacons de 100 ml | 2        |
| Insulne ordinaire flacon de 40 U            | 2        |
| Seringues a insuline                        | 50       |
| Bâches                                      | 2        |
| Tonomètre (Pr Kaimbo)                       | 1        |

| Matériel                | Quantité |
|-------------------------|----------|
| Chaises                 | 35       |
| Bancs                   | 10       |
| Tables                  | 25       |
| Tables d'examen         | 4        |
| Boîtes isotherme jostyl | 2        |
| Accumulateurs de froid  | 10       |
| Tonomètres              | 2        |

### 7.7. Considérations éthiques

Les sujets qui entreront dans l'étude seront informés de tout le déroulement de l'étude et leur consentement sera ensuite sollicité et confirmé par leur signature ou empreinte digitale sur le formulaire du consentement éclairé (en annexe).

Les avantages pour les sujets de l'étude seront les suivants :

1. Ils auront la gratuité d'un dépistage pour le diabète, la rétinopathie, le glaucome, la néphropathie, la neuropathie et l'hypertension.
2. En cas de maladie il y a aura une prise en charge au niveau de l'hôpital par le biais du billet de référence des centres de santé. Les cas urgents seront reçus d'emblée à l'hôpital. En cas d'hypoglycémie 30 ml de glucosé hypertonique seront donnés en bolus En cas d'hyperglycémie 10 U d'insuline seront données en sous cutané. En cas de glaucome aigu le malade recevra soit du timoptol en goutte a raison de 2 X 1 goutte / j soit du diamox en comprimé de 250 mg, 3 X 1 comprimé / j. Ceux dont la glycémie s'avérera positive seront référés à l'Hôpital St Luc pour des soins appropriés. Il en sera de même pour ceux dont le fond d'œil et la pression intraoculaire présenteront des valeurs anormales, ainsi que pour ceux dont l'albuminurie sera positive.  
Pour la rétinopathie dans les cas légers et modérés il faudra une surveillance et le superviseur passera dans les centres de santé suivant un calendrier prétabli. Les cas seront référés pour la photocoagulation au laser à Kinshasa avec une carte de rendez-vous ou sera organisée une accessibilité de l'accueil (point de contact Dr Mvitu) avec un tarif préférentiel pour leurs soins.
3. Il aura accessibilité financière et géographique. Les consultations se faisant localement et qui auraient coûté plus chers dans le milieu tertiaire. Il y aura le rapprochement des soins du niveau tertiaire vers le niveau primaire avec
4. La pérennisation de l'action sera obtenue par la formation du personnel au niveau des centres de santé et de l'hôpital, avec la supervision des ophtalmologues suivant un calendrier prétabli dans les centres de santé et à l'hôpital. Des campagnes d'éducation seront faites pour prévenir et retarder la maladie chez les individus à risque.

1  
2  
3  
4  
5  
6  
7  
8  
9  
10  
11  
12  
13  
14  
15  
16  
17  
18  
19  
20  
21  
22  
23  
24  
25  
26  
27  
28  
29  
30  
31  
32  
33  
34  
35  
36  
37  
38  
39  
40  
41  
42  
43  
44  
45  
46  
47  
48  
49  
50  
51  
52  
53  
54  
55  
56  
57  
58  
59  
60

5. Les individus avec facteurs de risque seront informés de faire le contrôle de leur glycémie une fois par an et seront orientés à l'hôpital St Luc pour une séance d'éducation. Des campagnes d'éducation seront faites pour prévenir et retarder la maladie chez les individus à risque.

Pour les individus avec IFG et IGT nous suggérons que soit entrepris une étude ultérieure une fois par an pendant 3 ans pour évaluer leur devenir par rapport au diabète sucré et aux complications.

Les risques pour les différents examens seront les suivants :

1. L'absentéisme au service sera annoncé par un mot du projet.

2. Pour les prélèvements : il peut exister le risque de traumatiser la veine ou de la perforer. Ce risque est amoindri pour un personnel bien formé. Les risques d'infections iatrogènes seront minimisés par l'usage de seringues et de lancettes stériles à usage unique fournies par le projet.

3. La novésine qui est un anesthésique servant à calculer la tension intraoculaire peut entraîner des vertiges. Il faut seulement demander au sujet de se reposer 15 minutes. Il ne faut pas l'utiliser en cas d'antécédent d'allergie aux anesthésiques locaux. Il peut y avoir le risque d'altération de l'épithélium cornéen pour contrer cela on utilisera qu'une seule goutte.

Le produit peut entraîner une irritation transitoire (par exemple picotement).

4. Il est conseillé de suspendre d'allaitement le jour de l'instillation de novésine, ces femmes feront partie de l'étude, mais ne feront pas les examens ophtalmologiques.

5. Le mydriaticum peut entraîner des troubles transitoires : une réaction allergique, des picotements transitoires, une sécheresse de la bouche, une dilatation prolongée de la pupille gênant la vision, ainsi il est demandé aux conducteurs de véhicule de ne pas conduire après pendant au moins 4 h, une sensibilité excessive à la lumière, une accélération du rythme du cœur et des maux de tête. Il entraîne aussi une augmentation de la pression intraoculaire avec risque de glaucome par fermeture de l'angle étroit, ceci est très rare dans la race noire et arrive surtout chez les Caucasiens.

On peut avoir une paralysie de l'accommodation, ainsi le sujet ne peut plus lire pendant quelques heures à 72 h.

Des troubles psychotiques, du comportement et des réactions générales peuvent survenir chez les enfants, ceux-ci ne feront pas partie de notre échantillon.

Les sujets seront garantis de la confidentialité des résultats de l'enquête.

1. Les différentes étapes du circuit se feront dans des bureaux.

2. Après chaque journée les fiches des sujets seront retirées et gardées par le chef d'équipe. Seuls les superviseurs y auront accès.



1  
2  
3 3. L'étude sera faite dans l'anonymat, les noms seront codés et les codes seront  
4 connus seulement des superviseurs.  
5  
6

7 N.B. l'étude a pris en charge 2 diabétiques méconnus ( achat d'insuline et transfert à St  
8 Luc)  
9

#### 10 11 7.8. Analyse de données (plan d'analyse)

12 Au fur et à mesure que les fiches sont remplies, elles seront envoyées à la codification. La  
13 codification des résultats sera faite par les superviseurs. Le contrôle de la qualité des  
14 données se fera chaque soir par l'équipe des superviseurs. La saisie se fera avec le  
15 logiciel EpiInfo. Les analyses plus élaborées seront réalisées sur SPSS 12.

16 Les mesures de fréquence, les mesures de tendance centrale et les mesures de dispersion  
17 seront utilisées pour l'analyse des données.  
18

19 Il sera recherché la proportion des non répondants et leurs caractéristiques (âge, sexe).

20 Pour connaître l'ampleur du diabète sucré les analyses suivantes seront faites : la  
21 prévalence instantanée du diabète sucré pour la cité de Kisantu et par aire de santé, la  
22 distribution des diabétiques par catégorie d'âge et par sexe, la moyenne d'âge, de poids,  
23 de tour de taille, de BMI et les catégories de BMI. Nous noterons aussi la proportion du  
24 diabète qui était non diagnostiqué.  
25  
26  
27

28 En rapport avec les complications du diabète les analyses suivantes seront effectuées : la  
29 proportion des diabétiques avec complications à une glycémie de 126 mg %. Le OR avec  
30 l'I.C. pour exprimer le rapport de cotes de la prévalence de la rétinopathie chez les  
31 diabétiques, chez les individus avec glycémie à jeûn perturbée et chez ceux avec  
32 intolérance au glucose. Le OR avec l'I.C. pour exprimer le rapport de cotes de la  
33 prévalence de l'hypertension artérielle chez les diabétiques, chez les individus avec IFG,  
34 chez ceux avec IGT et les non diabétiques avec le chi carré pour vérifier si l'hypertension  
35 artérielle est liée au diabète. Nous chercherons la proportion des néphropathies et  
36 neuropathies chez les diabétiques, les IFG et les IGT  
37

38 Pour ce qui est des facteurs de risque, nous allons utiliser  
39 le chi carré pour établir l'association du diabète avec les antécédents familiaux, avec les  
40 problèmes obstétricaux (gros bébés, avortements, morts-nés) et avec la sédentarité. Il sera  
41 rechercher la proportion des sujets avec IFG et ceux avec IGT. Nous allons rechercher  
42 la proportion des obèses.  
43  
44

45 Nous allons rechercher l'association de l'alcool et du tabac chez les diabétiques en  
46 calculant le OR. et le chi carré.  
47  
48

49 Les données seront résumées sous forme de tableaux et de graphiques.  
50

51 Un biais de sélection peut apparaître, les individus se connaissant diabétiques auront  
52 tendance à répondre plus nombreux à l'interview. Ceci peut être le fait des avantages qui  
53 leur seront offerts. Ce biais sera minimisé en effectuant un bon échantillonnage dans la  
54 population et en veillant à avoir le moins de non-réponses pour éviter que parmi ceux-ci  
55 les non diabétiques ne se retrouvent plus nombreux. Ainsi la première visite auprès des  
56  
57  
58  
59  
60



sujets visera la sensibilisation pour diminuer les refus. Les visites à domicile pendant l'enquête viseront à récupérer les absents.

#### 8. Le calendrier des activités

L'enquête a duré **28 jours** y compris la phase d'identification et celle de la récupération des sujets du lundi au samedi, elle débutait à 8 h 00. Pour minimiser les non-réponses de la 2<sup>ème</sup> glycémie les résultats étaient remis aux sujets le lendemain.

La succession des activités est exprimée dans le tableau n° 13. Le calendrier détaillé (annexe n° 9 )

Tableau n° 15

Le diagramme de GANTT

| N°  | Tâches                                                | Responsables                                                            | Février – Juin | Juillet 2006 | Janvier 2007 | Fevrier 2007 | Mars 2007 | Avril 2007 | Mai 2007 |
|-----|-------------------------------------------------------|-------------------------------------------------------------------------|----------------|--------------|--------------|--------------|-----------|------------|----------|
|     |                                                       |                                                                         | 2006           |              |              |              |           |            |          |
| 1.  | Elaboration du protocole de recherche                 | Equipe de recherche                                                     |                |              |              |              |           |            |          |
| 2.  | Présentation au comité d'éthique                      | Equipe de recherche                                                     |                | -            |              | -            |           |            |          |
| 3.  | Sensibilisation de la population                      | Relais communautaires                                                   |                |              |              |              |           |            |          |
| 4.  | Formation ophtalmologie et recrutement des enquêteurs | Dr. Mvitu                                                               |                |              |              | -            |           |            |          |
| 5.  | Formation des enquêteurs                              | Equipe de recherche                                                     |                |              |              | -            |           |            |          |
| 6.  | Relevé parcellaire                                    | Enquêteurs et Dr. Muyer                                                 |                |              |              |              | -         |            |          |
| 7.  | Prétest                                               | Equipe de recherche                                                     |                |              |              |              | -         |            |          |
| 8.  | Prétest : résultat                                    | Dr. Muyer                                                               |                |              |              |              | -         |            |          |
| 9.  | Identification des cibles                             | Les enquêteurs et Dr. Muyer                                             |                |              |              |              | -         | -          |          |
| 10. | Supervision générale des activités                    | Investigateur principal                                                 |                |              |              |              |           |            |          |
| 11. | Dépistage du diabète et des complications             | Les superviseurs<br>Les enquêteurs<br>Les laborantins<br>Les enquêteurs |                |              |              |              |           |            |          |

|     |                                                   |                        |  |  |  |  |  |  |  |
|-----|---------------------------------------------------|------------------------|--|--|--|--|--|--|--|
| 12. | Supervision des activités de dépistage du diabète | Le chercheur principal |  |  |  |  |  |  |  |
| 13. | Supervision ophtalmologique                       | Les ophtalmologues     |  |  |  |  |  |  |  |
| 14. | Saisie des données                                | Les saisisseurs        |  |  |  |  |  |  |  |
| 15. | Analyse des données                               | Equipe de recherche    |  |  |  |  |  |  |  |

La saisie des données a continué jusqu'en juillet. L'analyse sera à faire à Leuven.

## 9. Le budget

Il est exprimé dans le tableau 16.

Voici nos estimations avec leurs références

Diabète sucré : 7 % → **142** sujets (Nguala E.B., 2005)

IFG : 5% → **102** sujets (WHO, 2006)

IGT : 10 % → **203** sujets (WHO, 2006)

Total : **447** sujets devant subir les examens biochimiques (voir rubrique matériel)

N.B. : - Il est supposé que la rubrique matériel sera donnée par le financier.

- Nous préférons les bandelettes combi 9 parce qu'elles diagnostiquent en même temps les infections urinaires (et l'hématurie) et permettent ainsi de faire le diagnostic différentiel de l'albuminurie.

## 10. La gestion des fonds

Ce sera l'attribution de l'Ecole de Santé Publique par le Pr Okitolonda et le comptable du Projet. Les fonds proviendront du compte du VLIR / DIABETE et WDF.

Sur terrain les superviseurs et les enquêteurs seront payés sur fiches de payes par tâche (voir budget).

Tableau n° 16

Le budget

| Domaines                      | Rubrique                        | Quantité ou nombre | Durée jours | Coût U. \$ | Coût T. \$ | €          |
|-------------------------------|---------------------------------|--------------------|-------------|------------|------------|------------|
| Redaction du protocole        | Rames de papier                 | 3                  |             | 5          | 15         | 12         |
|                               | Cartouche                       | 1                  |             | 100        | 100        | 80         |
| <b>Sous - total</b>           |                                 |                    |             |            | <b>115</b> | <b>92</b>  |
| Communication<br>Cartes de t° | Coordonnateur                   | 2                  |             | 40         | 80         | 64         |
|                               | Superviseur                     | 4                  |             | 20         | 80         | 64         |
|                               | Médecin Inspecteur du Bas-Congo | 1                  |             | 30         | 30         | 24         |
| <b>Sous-total</b>             |                                 |                    |             |            | <b>190</b> | <b>152</b> |

| Domaines          | Rubrique                                                                                                        | Quantité ou nombre | Durée jours | Coût U. \$ | Coût T. \$ | €            |
|-------------------|-----------------------------------------------------------------------------------------------------------------|--------------------|-------------|------------|------------|--------------|
| Sensibilisation   | <b>Piles pour mégaphone</b><br>6 piles / mégaphone<br>pour 4 jours<br>60 piles pour 10 relais<br>communautaires | 300                | 20          | 0,5        | 150        | 120          |
|                   | <b>Collation</b>                                                                                                |                    |             |            |            |              |
|                   | Relais communautaire                                                                                            | 10                 | 20          | 20/ pers   | 200        | 160          |
|                   | M CZ                                                                                                            | 1                  |             | 50         | 50         | 40           |
|                   | Animateur<br>communautaire                                                                                      | 1                  |             | 50         | 50         | 40           |
|                   | Logisticien                                                                                                     | 1                  |             | 50         | 50         | 40           |
|                   | <b>Banderoles</b>                                                                                               | 3                  |             | 25         | 75         | 60           |
|                   | <b>Messages a la radio</b>                                                                                      | 10                 |             | 1,2        | 12         | 9,6          |
| <b>Sous-total</b> |                                                                                                                 |                    |             |            | <b>587</b> | <b>469,6</b> |

review only

| Domaines                   | Rubrique                                 | Quantité ou nombre | Durée jours | Coût U. \$ | Coût T. \$   | €             |
|----------------------------|------------------------------------------|--------------------|-------------|------------|--------------|---------------|
| Formation<br>Ophtalmologie | Logistique                               |                    |             |            |              |               |
|                            | Rame papier                              | 1                  | 1           | 5          | 5            | 4             |
| 7 infirmiers               | Bics ( boîte de 50 )                     | 50                 |             |            | 5            | 4             |
| 3 superviseurs             | Crayons + gomme                          | 50                 |             |            | 5            | 4             |
|                            | Cartouche                                | 1                  |             | 100        | 100          | 80            |
|                            | Location de la salle                     | 1                  | 1           | 10 / j     | 10           | 8             |
|                            | Collation Infirmiers                     | 6                  | 2           | 2          | 24           | 19,2          |
|                            |                                          | 3                  | 2           | 22,5       | 123          | 98,4          |
|                            | <b>Logement et Repas</b><br>Superviseurs |                    |             | 70         | 70           | 56            |
|                            | <b>Transport</b><br>70 l                 |                    |             |            | 1,50         | 1,2           |
|                            | Péage                                    | 4                  |             |            | 1,2          | 0,96          |
|                            | Marqueurs                                |                    |             |            |              |               |
| <b>Sous-Total</b>          |                                          |                    |             |            | <b>344,7</b> | <b>275,76</b> |

| Domaines                                                                  | Rubrique                                  | Quantité<br>nombre | ou | Durée<br>jours | Coût U. \$ | Coût T.<br>\$ | €             |
|---------------------------------------------------------------------------|-------------------------------------------|--------------------|----|----------------|------------|---------------|---------------|
| Formation sur l'enquête<br>5 infirmiers<br>30 enquêteurs<br>5 laborantins | Logistique                                |                    |    |                |            |               |               |
|                                                                           | Rames de papier (questionnaires +modules) | 3                  |    |                | 5          | 15            | 12            |
|                                                                           | Livre sur le pied photocopies             | 50                 |    |                | 1 / livre  | 50            | 40            |
|                                                                           | Photo des pieds                           | 1                  |    |                | 1,45       | 1,45          | 1,16          |
|                                                                           | Encre correcteur                          | 2                  |    |                | 1          | 2             | 1,6           |
|                                                                           | Scotch                                    | 2                  |    |                | 0,67       | 1,27          | 1,02          |
|                                                                           | Location de la salle                      | 1                  |    | 4              | 10         | 40            | 32            |
|                                                                           | <b>Perdiem</b>                            |                    |    |                |            |               |               |
|                                                                           | Infirmiers et                             | 15                 |    | 3              | 3          | 135           | 108           |
|                                                                           | Enquêteurs                                | 23                 |    | 4              | 3          | 276           | 220,8         |
|                                                                           | Laborantins                               | 5                  |    | 1              | 3          | 15            | 12            |
|                                                                           | <b>Logement</b>                           |                    |    |                |            |               |               |
|                                                                           | Superviseurs                              | 4                  |    | 3              | 7          | 7             | 67,2          |
|                                                                           | Dr Mandja                                 | 1                  |    | 1              | 7          |               | 5,6           |
|                                                                           | <b>Repas</b>                              |                    |    |                |            |               |               |
|                                                                           | Superviseurs                              |                    |    |                |            |               |               |
|                                                                           | Petit déjeuners                           | 4                  |    | 3              | 4          | 48            | 38,4          |
|                                                                           | Dîners                                    | 4                  |    | 4              | 5          | 80            | 64            |
|                                                                           | Soupers                                   | 4                  |    | 3              | 4,5        | 54            | 43,2          |
|                                                                           | Dr Mandja                                 |                    |    |                |            |               |               |
|                                                                           | Petit déjeuner                            | 1                  |    | 1              | 4          | 4             | 3,2           |
| Dîner                                                                     | 1                                         |                    | 2  | 5              | 10         | 8             |               |
| Souper                                                                    | 1                                         |                    | 1  | 4,5            | 4,5        | 3,6           |               |
| <b>Transport</b>                                                          |                                           |                    |    |                |            |               |               |
| Aller-retour : 35 L x 2                                                   | 4                                         |                    |    | 1 / L          | 70         | 56            |               |
| Dr Mandja Kin.-Kisantu                                                    | 1                                         |                    |    |                | 5,45       | 4,36          |               |
| Rallonge                                                                  | 1                                         |                    |    | 30             | 30         | 24            |               |
| <b>Sous-total</b>                                                         |                                           |                    |    |                |            | <b>848,67</b> | <b>678,94</b> |

| Domaines        | Rubrique                                                                         | Quantité ou nombre | Durée jours | Coût U. \$ | Coût T. \$ | €          |              |
|-----------------|----------------------------------------------------------------------------------|--------------------|-------------|------------|------------|------------|--------------|
| <b>Pré test</b> | <b>Questionnaires</b><br>Rames de papier                                         | 1                  |             | 5          | 5          | 4          |              |
|                 | <b>Transport Madimba</b><br>Superviseur 40 L                                     | 4                  | 3           | 1 / L      | 80         | 64         |              |
|                 | Coordonnateur 40 L<br>aller-retour                                               | 1                  |             |            | 40         | 32         |              |
|                 | <b>Collation</b><br>-Enquêteurs                                                  | 30                 | 2           | 2          | 120        | 96         |              |
|                 | -Superviseurs                                                                    | 4                  | 2           | 2          | 16         | 12,8       |              |
|                 | -Coordonnateur                                                                   | 1                  | 1           | 5          | 5          | 4          |              |
|                 | -Laborantin                                                                      | 1                  | 1           | 2          | 2          | 1,6        |              |
|                 | -Infirmiers<br>ophtalmologues des<br>CS                                          | 5                  | 1           | 2          | 10         | 8          |              |
|                 | <b>Matériel</b><br>Créatinine                                                    | 5                  |             | 2          | 10         | 8          |              |
|                 | Gants                                                                            | 30 paires          |             | 6          | 6          | 4,8        |              |
|                 | <b>Transport Aller-<br/>Retour</b><br>-Enquêteurs                                | 30                 | 2           | 3          | 180        | 144        |              |
|                 | -Laborantins                                                                     | 1                  | 1           | 3          | 3          | 2,4        |              |
|                 | -Infirmiers<br>ophtalmologues                                                    | 5                  | 1           | 3          | 15         | 12         |              |
|                 | <b>Centre de Santé</b><br>Arrangement du<br>materiel: bâches,<br>chaises, tables |                    |             |            | 10         | 8          |              |
|                 | <b>Sous-total</b>                                                                |                    |             |            |            | <b>502</b> | <b>401,6</b> |

| Domaines              | Rubrique                                 | Quantité<br>nombre | ou<br>Durée<br>jours | Coût U. \$ | Coût T.<br>\$  | €          |
|-----------------------|------------------------------------------|--------------------|----------------------|------------|----------------|------------|
| Relevé<br>parcellaire | <b>Logement</b><br>Superviseurs          | 3                  | 5                    | 5          | 75             | 60         |
|                       | <b>Repas matin /soir</b><br>Superviseurs | 3                  | 6                    |            | 120            | 96         |
|                       | Collation a 12 h                         | 2                  | 4                    | 1          | 8              | 6,4        |
|                       |                                          | 1                  | 1                    | 1          | 1              | 0,8        |
|                       | <b>Perdiem des</b><br>Enquêteurs         | 3                  | 7                    | 4          | 84             | 67,5       |
|                       |                                          | 2                  | 6                    | 4          | 48             | 38,4       |
|                       |                                          | 8                  | 5                    | 4          | 160            | 128        |
|                       |                                          | 11                 | 4                    | 4          | 176            | 140,8      |
|                       |                                          | 1                  | 3                    | 4          | 12             | 9,6        |
|                       | Perdiem Dr Mandja                        | 1                  | 4                    | 10         | 40             | 32         |
|                       | Rame de papier                           | 2                  |                      | 5          | 10             | 8          |
|                       | <b>Transport</b> Superviseur<br>Aller    | 3                  |                      | 1          | 35             | 35         |
|                       | Retour (taxi)<br>Sur terrain             | 2                  |                      |            | 10,37          | 8,3        |
|                       |                                          |                    |                      |            | 40             | 32         |
|                       | Péage                                    |                    |                      |            | 1,5            | 1,2        |
| <b>Sous-total</b>     |                                          |                    |                      |            | <b>820 ,27</b> | <b>664</b> |

| Domaines                                            | Rubrique                                       | Quantité ou nombre | Durée jours | Coût U. \$    | Coût T. \$ | €              |
|-----------------------------------------------------|------------------------------------------------|--------------------|-------------|---------------|------------|----------------|
| <b>Identification des cibles et sensibilisation</b> | Enquêteurs Collation + 5 infirmiers            | 25                 | 6           | 5             | 750        | 600            |
|                                                     | Logement du superviseur                        | 5                  | 6           | 5             | 150        | 120            |
|                                                     | Repas du superviseur, matin et soir            | 5                  | 6           |               | 200        | 160            |
|                                                     | Collation a 12 h                               | 5                  | 6           | 1             | 30         | 24             |
|                                                     | Rame de papier pour formulaire de consentement | 9                  |             | 5             | 45         | 36             |
|                                                     | Rame de papier pour fiche de recrutement       | 1                  |             | 5             | 5          | 4              |
|                                                     | Master                                         | 1                  |             | 70            | 70         | 56             |
|                                                     | Encre                                          | 2                  |             | 45            | 90         | 72             |
|                                                     | Papier farde                                   | 22                 |             | 1             | 22         | 17,6           |
|                                                     | Tampons pour empreinte digitale                | 10                 |             | 0,71          | 7,12       | 5,7            |
|                                                     | Encre pour tampons                             | 1                  |             | 1             | 1          | 0,8            |
|                                                     | Fardes sacoches                                | 25                 |             | 2             | 50         | 40             |
|                                                     | Parapluies                                     | 30                 |             | 3             | 90         | 72             |
|                                                     | Transport aller-retour Péage                   | 5                  |             | 1 / L<br>1,50 | 70<br>1,50 | 56<br>1,20     |
|                                                     |                                                | <b>Sous total</b>  |             |               |            | <b>1581,62</b> |



| Domaines  | Rubrique                                       | Quantité<br>nombre | ou | Durée<br>jours | Coût U. \$ | Coût T.<br>\$ | €          |
|-----------|------------------------------------------------|--------------------|----|----------------|------------|---------------|------------|
| Enquête   | <b>Documents</b>                               |                    |    |                |            |               |            |
|           | <i>*Carnet de suivi des activités</i>          |                    |    |                |            |               |            |
|           | <i>Registre laboratoire</i>                    | 1                  |    |                | 5          | 5             | 4          |
|           | <i>Calculatrice-</i>                           | 1                  |    |                | 5          | 5             | 4          |
|           | <i>*Impression de</i>                          | 1                  |    |                | 5          | 5             | 4          |
|           | <i>2050 questionnaires</i>                     |                    |    |                |            |               |            |
|           | Rame de papier                                 | 30                 |    |                | 5          | 150           | 120        |
|           | Master                                         | 2                  |    |                | 70         | 140           | 112        |
|           | Encre                                          | 4                  |    |                | 45         | 180           | 144        |
|           | Réprographe                                    | 1                  |    |                |            | 150           | 120        |
|           | Agraphes de toutes dimensions                  | 4                  |    |                |            | 20            | 16         |
|           | Agrapheuse grande dimension                    | 1                  |    |                | 50         | 50            | 40         |
|           | <i>*Rédaction et production de 10 rapports</i> |                    |    |                |            |               |            |
|           | Rame de papier                                 | 2                  |    |                | 5          | 10            | 8          |
|           | Reliure                                        | 10                 |    |                | 1          | 10            | 8          |
| Cartouche | 1                                              |                    |    | 100            | 100        | 80            |            |
|           | <b>Sous-total</b>                              |                    |    |                |            | <b>825</b>    | <b>660</b> |

| Domaines | Rubrique                     | Quantité ou nombre | Durée jours | Coût U. \$ | Coût T. \$     | €             |
|----------|------------------------------|--------------------|-------------|------------|----------------|---------------|
|          | <b>Logement</b>              |                    |             |            |                |               |
|          | Superviseur                  | 4                  | 23          | 5          | 460            | 368           |
|          | Coordonnateur                | 1                  | 23          | 7          | 161            | 128,8         |
|          | <b>Repas matin et soir</b>   |                    |             |            |                |               |
|          | Superviseur                  | 4                  | 23          |            | 613            | 490,4         |
|          | Coordonnateur                | 1                  | 23          | 8,5        | 195,5          | 156,4         |
|          | <b>Collation midi</b>        | 5                  | 23          | 1          | 115            | 92            |
|          | <b>Perdiem</b>               |                    |             |            |                |               |
|          | Coordonnateur                | 1                  |             |            | 600            | 480           |
|          | Superviseur                  | 3                  | 21          | 10         | 630            | 504           |
|          | Enquêteurs                   | 20                 | 21          | 7          | 2940           | 2352          |
|          | Infirmiers                   | 5                  | 21          | 7          | 735            | 588           |
|          | Infirmiers ophtalmo.         | 5                  | 21          | 7          | 735            | 588           |
|          | Grégoire                     | 1                  | 11          | 7          | 77             | 61,6          |
|          | Saisisseurs                  | 4                  | 21          | 10         | 840            | 672           |
|          | Codificateurs                | 5                  |             | 100        | 500            | 400           |
|          | Comptable                    | 1                  |             | 150        | 150            | 120           |
|          | Le gestionnaire              | 1                  |             | 200        | 200            | 160           |
|          | Laborantin du C.S            | 1                  | 21          | 7          | 147            | 117,6         |
|          | Chef de laboratoire          | 1                  |             | forfait    | 10             | 8             |
|          | Infirmier titulaire          | 1                  |             | forfait    | 10             | 8             |
|          | MCZS                         | 1                  |             | forfait    | 50             | 40            |
|          | Relais pour bancs.....       | 10                 |             | forfait    | 200            | 160           |
|          |                              |                    |             | 20 / pers  |                |               |
|          | Menuisier (box)              |                    |             |            | 580            | 464           |
|          | Cuisinière                   | 1                  |             | 150        | 150            | 120           |
|          | <b>Sujets 2025</b>           |                    |             |            |                |               |
|          | - sel sac de 25 kg           | 41                 |             | 10         | 410            | 328           |
|          | - savons familia sachet de 9 | 225                |             | 4          | 900            | 720           |
|          | - collation (pain)           | 2025               |             | 0,2        | 405            | 324           |
|          | - sachet emballage           | 2025               |             | 100 / 1,5  | 31             | 24,8          |
|          | <b>Sous-total</b>            |                    |             |            | <b>11844,5</b> | <b>9475,6</b> |

| Domaines | Rubrique                      | Quantité ou nombre | Durée jours | Coût U. \$ | Coût T. \$  | €            |
|----------|-------------------------------|--------------------|-------------|------------|-------------|--------------|
|          | <b>Transport aller-retour</b> |                    |             |            |             |              |
|          | - Comptable<br>35 X 2         | 1                  | 1           | 1          | 70          | 56           |
|          | - Coordonnateur<br>35 X 2     | 2                  | 1           | 1          | 70          | 56           |
|          | - Superviseur<br>35 X 2       | 4                  |             | 1          | 70          | 56           |
|          | -Location voiture             |                    |             |            | 1500        | 1200         |
|          | -Peage                        | 1                  | 21          |            | 1,20        | 1,20         |
|          |                               |                    |             | 1,50       |             |              |
|          | <b>Sous-total</b>             |                    |             |            | <b>1710</b> | <b>1368</b>  |
| Matériel | Optotypes                     | 10                 |             | 40         | 400         | 320          |
|          | Ampoules pour ophtalmoscope   | 2                  |             | 84         | 168         | 134,4        |
|          | <b>Sous total</b>             |                    |             |            | <b>568</b>  | <b>454,4</b> |

| Domaines              | Rubrique                                   | Quantité ou nombre   | Durée jours | Coût U. \$    | Coût T. \$      | €               |
|-----------------------|--------------------------------------------|----------------------|-------------|---------------|-----------------|-----------------|
| Matériel              | Ouate rouleau                              | 5                    |             | 5             | 25              | 20              |
|                       | Alcool bidon 5 litres                      | 3                    |             | 10            | 30              | 24              |
|                       | Lancettes                                  | 447 (déjà reçu 2060) |             | 10 \$/100     | 4,5             | 3,6             |
|                       | Créatinémie                                | 447                  |             | 2,0           | 900             | 720             |
|                       | Tensiomètres avec petits et gros brassards | 6                    |             | 50            | 300             | 240             |
|                       | Stéthoscopes                               | 6                    |             | 10            | 60              | 48              |
|                       | Toise                                      | 5                    |             | 25            | 125             | 100             |
|                       | Balance                                    | 5                    |             | 100           | 500             | 400             |
|                       | Mydriaticum flacons                        | 50                   |             | 8             | 400             | 320             |
|                       | Novésine collyre                           | 50                   |             | 8             | 400             | 320             |
|                       | Javel                                      | 15 L / Centre        |             | 5 / 5 L       | 75              | 60              |
|                       | Gants                                      | 500                  |             | 6 / 50 paires | 60              | 48              |
|                       | Glucose anhydre 22 kg                      | 150                  |             | 5 / kg        | 110             | 80              |
|                       | Eau pure 250 ml / pers.                    | 447                  |             | 2 \$ / 5 L    | 112             | 89,6            |
|                       | Gobelet                                    | 150                  |             | 0,2           | 30              | 24              |
|                       | Sparadrap (labo)                           | 2 / CS               |             | 0.5           | 5               | 4               |
|                       | Sceau                                      | 1 / CS               |             | 2             | 10              | 8               |
|                       | Touque de 120 L                            | 1                    |             | 20            | 20              | 16              |
|                       | Location chaises plastiques                | 73                   | 19          | 100 / ch      | 262             | 209,6           |
|                       | Tables                                     | 15                   | 19          | 250 / table   | 135             | 108             |
| Tabouret en plastique | 5                                          |                      | 5           | 25            | 20              |                 |
| Ecrivoires            | 10                                         |                      | 5           | 50            | 40              |                 |
| Bandelette Combi 9    | 5 btes de 100                              |                      | 35 / bte    | 155           | 124             |                 |
| Portoir               | 1                                          |                      | 30          | 30            | 24              |                 |
|                       | <b>Sous total</b>                          |                      |             |               | <b>3823,5</b>   | <b>3050,8</b>   |
|                       | <b>Imprevu</b>                             |                      |             |               | <b>1188</b>     | <b>950,4</b>    |
|                       | <b>TOTAL</b>                               |                      |             |               | <b>249480,0</b> | <b>19958,40</b> |

#### Note explicative pour le budget

Le budget a été réaménagé en fonction du vécu sur terrain, suite à la visite faite à Kisantu pour les deux formations et le relevé parcellaire. Différents paramètres font que le travail sera très dur.

- 1
  - 2
  - 3
  - 4
  - 5
  - 6
  - 7
  - 8
  - 9
  - 10
  - 11
  - 12
  - 13
  - 14
  - 15
  - 16
  - 17
  - 18
  - 19
  - 20
  - 21
  - 22
  - 23
  - 24
  - 25
  - 26
  - 27
  - 28
  - 29
  - 30
  - 31
  - 32
  - 33
  - 34
  - 35
  - 36
  - 37
  - 38
  - 39
  - 40
  - 41
  - 42
  - 43
  - 44
  - 45
  - 46
  - 47
  - 48
  - 49
  - 50
  - 51
  - 52
  - 53
  - 54
  - 55
  - 56
  - 57
  - 58
  - 59
  - 60
1. La photocopieuse de l'ESP du projet du Professeur Okito sera utilisée pour aider a la multiplication des questionnaires.
  2. Dans l'enquête :
    - 23 jours parce-que l'équipe des superviseurs arrivent la veille et repart le lendemain de l'étude
    - Les deux coordonnateurs sont budgétisés comme une seule personne, car ils viendront à tour de rôle. Le perdiem donné par le VLIR ne peut suppléer l'interruption de activités que les coordonnateurs devront faire.
    - Le perdiem des superviseurs servira aux Dr Mvitu, Kimenyembwe et Dr Mandja qui ne bénéficient pas topping-up.
  7. Le Dr Kimbondo nous a informé qu'étant seul médecin dans son service il ne sera pas beaucoup disponible. C'est ainsi que déjà pour la formation et le relevé parcellaire il était absent, étant envoyé par l'hôpital pour assister à une formation à Kinshasa.

Cela nous a poussé pour maintenir l'équilibre dans l'équipe à recruter le Dr Mandja, assistant du Professeur Mapatano et travaillant au Centre d'Epidémiologie du diabète sucré pour les jours où le Dr Kimbondo est absent.
  8. Les sujets eux-même doivent absolument être motivés pour accepter de patienter sur les lieux du site. L'attente sur le site, le sacrifice de leur travail (beaucoup sont des cultivateurs), le jeun à l'arrivée, sont autant de facteurs qu'il faut maîtriser pour la réussite de l'étude et grâce à cette collation nous pensons réussir.
  9. Le prix de la location du véhicule n'est ainsi pas du tout excessif. Nous avons essayer de contacter d'autre véhicule qui nous proposent un minimum de 2000 \$.
  10. Les sœurs de Virgo et l'Emmaus seront plein pour le reste du mois de mars, ainsi nous avons pris des contacts pour louer des chambres chez un individu. Nous engagerons une cuisinière pour préparer les repas.
  11. Certaines rubriques ont été réduites notamment le logement, les repas et quelques matériels au profit de l'augmentation d'autres et de l'ajoute d'autres oubliées au départ.

## 1 1. Bibliographie

1. World Health Organisation.. The world health report 1997. Conquering, suffering, enriching humanity. Geneva. 1997.  
[http://www.who.int/whr/1997/en/whr97\\_en.pdf](http://www.who.int/whr/1997/en/whr97_en.pdf) (Page consultée le 31/12/2006).
2. World Health Organisation 1999. Definition, Diagnosis and Classification of Diabetes Mellitus.  
[http://www.staff.ncl.ac.uk/philip.home/who\\_dmc.htm](http://www.staff.ncl.ac.uk/philip.home/who_dmc.htm). (Page consultée le 25 juillet 2005).
3. BCZS. Rapport du recensement janvier 2006.
4. Arrêté n° 21/148. 5 février 1956.
5. Bieleli E., Moswa J.L., Ditu M., Kandjingu K., Mulumba M., Mayangi M.. La prévalence du diabète sucré au sein de la population de Kinshasa. Congo Médical; 2000; II (15) : 1058-1061.
6. Ilunga N.J. Profil du diabète sucré à Lubumbashi. Congo Médical; 2004; III (13) : 1121 – 1123.
7. Nguala E.B. La prévalence du diabète sucre dans la zone de santé de Kisantu, cas de la cité de Kintanu. 37 p. Travail de fin de cycle pour le graduat en Techniques Médicales : Kisantu : ISTM / KISANTU : 2005.
8. DECODE Study Group. Age-and Sex-Specific prevalences of diabetes and impaired glucose Regulation in 13 European Cohorts. Diabetes Care; 2003; 26, 61-69.
9. DECODA Study Group. Age-and Sex-Specific prevalences of diabetes and impaired glucose Regulation in 11 Asian Cohorts. Diabetes Care; 2003; 26, 61-69.
10. Grimaldi A. Guide pratique du diabète. 2<sup>nd</sup> édition. Issy-les Moulineaux : Masson, 2003 : 372.
11. Barile S., Duchateau E., Galand A., Ancion G. Principales notions actuelles sur la rétinopathie diabétique. Revue médicale de Liège; 2001; 10 : 709-715.
12. American Diabetes Association. Diabetic Retinopathy. Diabetes Care; 2003; vol 26 (1) : S99-S102.
13. National Institute of Diabetes and Digestive and Kidney Diseases. National Diabetes Statistics 2005.  
<http://diabetes.niddk.nih.gov/dm/pubs/Statistics/index.htm#11>.
14. Kaimbo D., Kabangu B., Missoten L. Les complications oculaires du diabète sucré au Zaire. Bull. Soc. Belge Ophtalmol; 1994; 295; 107-113.
15. Association Belge du diabète. Types de diabète et données étiopathogéniques. 1<sup>ère</sup> édition. Bruxelles : De Hertogh R., 1999 : 157.
16. American Diabetes Association. Diabetic Nephropathy. Diabetes Care; 2003; vol 26 (1) : S94-S98.
17. American Diabetes Association. Screening for Diabetes. Diabetes Care; Jan 2006; vol 29 (1) : S5-S6.
17. King H, Rewers M. Global estimates for prevalence of diabetes mellitus and impaired glucose tolerance in adults. WHO Ad Hoc Diabetes Reporting Group. Diabetes Care. 1993 Jan;16(1):157-77.

18. Mbanya J.C.N., Ngogang J., Salah J.N., Minkoulou E., Balkau B. Prevalence of NIDDM and impaired glucose tolerance in rural and urban population in Cameroon.. *Diabetologia*; 1997; 40 : 24-29.
19. Gu D., Reynolds K., Duan X., and al. Prevalence of diabetes and impaired fasting glucose in the Chinese adult population : International Collaborative Study of Cardiovascular Disease in Asia (InterAsia). *Diabetologia*; 2003; 46 (9) : 1190-1198.
20. Fédération Internationale du Diabète. Diabète Atlas (résumé). Diabète Atlas 2<sup>nd</sup> édition. Bruxelles : Delice Gan, 2003 : 56.
21. Zimmet P., Lefevre P. The Global NIDDM epidemic. Treating the disease and ignoring the symptom. *Diabetologia*; 1996; 39 : 1247-1248.
22. King, RE Aubert and WH Herman. Global burden of diabetes, 1995-2025: prevalence, numerical estimates, and projections. *Diabetes Care*; 1998; Vol 21, Issue 9 : 1414-1431.
23. World Health Organisation. Report of a WHO/IDF consultation. Definition and diagnosis of diabetes mellitus and intermediate hyperglycaemia. Geneva, Switzerland : World Health Organisation, 2006.
24. American Diabetes Association. Report of the Expert Committee on the Diagnosis and Classification of Diabetes Mellitus. *Diabetes Care*; 2003; vol 26 : 1770-1780.
25. Eschwege E. Diabète de type 2 : l'épidémie mondiale, données francaises. *Officiel Santé*; mars/avril 2005; 28 : p 60.
26. Barcello A. Diabète sucré non insulino-dépendant. Série de monographies sur les maladies liées au vieillissement VIII; 2000, vol 17 (1).
27. Acton K.J. Diabetes prevalence among American Indians and Alaska natives and the overall population – United States, 1994-2002. *MMWR*, 2003. [Http: //www.cdc.gov/mmwr/preview/mmwhhtm/mm5230a3.htm](http://www.cdc.gov/mmwr/preview/mmwhhtm/mm5230a3.htm) (page consultée le 22/12/2006).
28. Capet F., Debaillie R., Tafforeau J., Van Oyen H. Diabète, état des connaissances en Belgique et apport d'éléments pour l'élaboration d'une politique de santé. Institut De Santé Publique Centre De Recherche Opérationnelle En Santé Publique (Episerie n°19), 1999 : 52.
29. Al-Lawati J.A., Al Riyami A.M., Mohammed A.J., Jousilahti P. Increasing prevalence of diabetes mellitus in Oman. *Increasing prevalence of diabetes mellitus in Oman. Diabetic Medicine*; 2002; 19 (11) : 954-957.
30. Ubink-Veltmaat L. J. Bilo H. J. G. Groenier K. H. Houweling S. T. Rischen R. O. Meyboom-De Jong B. Prevalence, incidence and mortality of type 2 diabetes mellitus revisited : A prospective population-based study in The Netherlands (ZODIAC-1). *European Journal Of Epidemiology*; 2003; vol. 18, (8) : 793-800.
31. Riste L., Khan F., Cruickshank K. High Prevalence of Type 2 Diabetes in All Ethnic Groups, Including Europeans, in a British Inner City. *Diabetes Care*; 2001 (24) : 1377-1383.
32. Saadat N., Salehi P., Emami H., Azizi F. The relationship between glucose intolerance and blood pressure, body mass index, and waist to hip ratio in Teheran urban population: "Teheran lipid and glucose study". 2001.

- 1  
2  
3  
4  
5 <http://www.ijem.org/5/38.xhtml>. (page consultée le 22/12/2006).
- 6 33. Abdul-Rahim HF., Husseini A., Giacaman R., Jervell J., Bjertness E. Diabetes mellitus  
7 in an urban Palestinian population : prevalence and associated factors. *East Mediterr*  
8 *Health J*; Jan-Mar 2001, 7(1-2) : 67-78.
- 9 34. Zimmet P. Diabetes in Australia : an Affair of the Heart. *Heart Lung and Circulation*;  
10 2003; 12 : S 95-S 98.
- 11 35. Hegele R.A., Barlett L.C. Genetics, environment and type 2 diabetes in the Oji-Cree  
12 population of Northern Ontario. *Can J Diabetes*, 2005; 27 (3) : 256-261.
- 13 36. Barcelo A., Rajpathak S. Incidence and prevalence of diabetes mellitus in the  
14 Americas. Washington. *Revista Panamericana de Salud Publica*; 2001; vol 10 (5),
- 15 37. Zimmet P., Faaibuso S., Ainuu J., Whitehouse S., Milne B. and DeBoer W. The  
16 prevalence of diabetes in the rural and urban Polynesian population of Western  
17 Samoa. *Diabetes*; 1981, 30 (1) : 45-51.
- 18 38. Fontbonne A., Favier F., Papoz L. Le diabète de type 2 dans le monde : analyse d'une  
19 épidémie. *Journées de diabétologie 2003*.  
20 [http://journées.hotel-dieu.com/medias/texte06\\_2001.pdf](http://journées.hotel-dieu.com/medias/texte06_2001.pdf). (Page consultée en juillet  
21 2005).
- 22 39. Ramachandran A., Snehalatha C., Latha E., Viswanathan M. Rising prevalence of  
23 NIDDM in an urban population in India. *Diabetologica*; 1997(feb); 40 (2) : 232-7.
- 24 40. Ghaffar A., Srinath K.R., Singi M. Burden of non-communicable diseases in South  
25 Asia. *BMJ*; 2004; 328: 807-810.
- 26 41. Gautier J.-F., Sobngwi E., Vexiaui P. Comment je traite et prends en charge un  
27 diabète du sujet noir.  
28 Site [journées.hotel-dieu.com/medias,chap\\_17.pdf](http://journées.hotel-dieu.com/medias,chap_17.pdf).
- 29 42. Herman W., Aubert R., Ali M.A., Sous E.S., Badran A. Diabetes mellitus in Egypt :  
30 risk factors, prevalence and future burden; 1997; vol. 3 (1) : 144-148.
- 31 43. Sobngwi e., Mauvais-Jarvis F., Vexiau P., Mbanya JC., Gautier JF. Diabetes in  
32 Africans; 2001.  
33 [www.alfediam.org/media/pdf/RevueSobngwiPt2D&M1-2002pdf.pdf](http://www.alfediam.org/media/pdf/RevueSobngwiPt2D&M1-2002pdf.pdf)
- 34 44. Ahmed A. diabetes care in Sudan : emerging issues and acute needs. *Diabetes Voice*;  
35 2006; 51 (3) : 13-15.
- 36 45. Owoaje E.E., Rotimi CN., Kaufman JS, Tracy J., Cooper RS. Prevalence of adult  
37 diabetes in Ibadan, Nigeria. *East Afr Med J*; 1997 May; 74 (5) : 299-302.
- 38 46. Djrolo F., Amoussou-Guenou K .D., Zannou D.M., Houinato D., Ahouandogbo F.,  
39 Hounbe F. Prévalence du diabète sucré au Bénin. *Louvain Médical*; 2003; 122 (6) :  
40 256-260.
- 41 47. Amoah Ag., Owusu Sk., Adjei S. Diabetes in Ghana : a community based prevalence  
42 study in Greater Accra. *Diabetes Res Clin Pract*; 2002; 56 (3) jun : 197-205.
- 43 47. Unwin N., Setel P., Rashid S., Mugusi F., Mbanya JC, Kitange K. Noncommunicable  
44 diseases in Sub-Saharan Africa: where do they feature in the health research agenda?  
45 *Bull World Health Organisation*;; 2001, vol 79 (10), 947-953.
- 46 48. Watkins P., Alemu S. Delivery of diabetes care in rural Ethiopia. : an experience from  
47 Gondar. *Ethiopian Medical Journal*; 2003; 41: 9-7.
- 48  
49  
50  
51  
52  
53  
54  
55  
56  
57  
58  
59  
60



- 1
- 2
- 3
- 4
- 5 49. Ntyonga-Pono M.P., Nguembi-Mbina C. Le diabète sucré à Libreville : prévalence et perspectives. *Médecine d'Afrique Noire*; 1996; 43 (7) : 430-433.
- 6
- 7 50. Aspray T.J. Mugusi F., Rashid S., Whiting D., Edwards R., Alberti K G., Unwin N.C. Rural and urban differences in diabetes prevalence in Tanzania : the role of obesity, physical, inactivity and urban living. <http://cat.inist.fr/?aModele=afficheN&cpsidt=829731>
- 8
- 9
- 10
- 11 51. Bourgoignie J., Sonnet J., Dechef G. Etude clinique du diabète sucré du Bantou de Léopoldville. Louvain, 1962 : 26-27.
- 12
- 13 52. Kandjingu K. Problématique du diabète en RDC. Ier symposium International du diabète à Kinshasa –R.D.- Congo. *Congo médical* ; 2002; III (7) : 626-633.
- 14
- 15 53. Bafende A.E ; Meli S.P. Profil des patients diabétiques en milieu hospitalier rural : cas de l'hôpital de l'Institut Médical Evanglique IME/Kimpese. *Congo médical* ; 2001; 3 (4) : 293-294.
- 16
- 17
- 18
- 19
- 20 54. Buysschaert M. Diabétologie clinique. Bruxelles : De Boek Université, 1998 : 189.
- 21 55. Abdulbari B., Mahmoud Z., Ammar A.-R. Genetics, oesity and environmental risk factors associated with type 2 diabetes. *Croat Med. J.* 2005; 46 (2); 302-307.
- 22
- 23 56 Annis AM, Caulder MS, Cook ML, Duquette D. Family History, Diabetes, and Other Demographics Factors Among Participants of the National Health Nutrition Examination Survey 1999-2002. *Prev Chronic Dis.* 2005 Apri ; 2 (2) : A19.
- 24
- 25 57. Goday A, Ybarra. J. Link between obesity and type 2 diabetes. *Best Practice and Research Clinical Endocrinology and Metabolism.* Volume 19, Issue 4, December 2005 : 649-663.
- 26
- 27
- 28
- 29
- 30 58. American Diabetes Association. Screening for Type 2 Diabetes. *Diabetes Care*; 2003; vol 26 (1) : S21-S24.
- 31
- 32 59. Fumeron F. De l'obésité au diabète de type 2 : épidémiologie et physiopathologie. *CHOLE-DOC*, Mars/Avril 2005; (88).
- 33
- 34 60. Delpeuch B.M. La transition nutritionnelle, l'alimentation et les villes dans les pays en développement. [http://www.santediabetemali.org/newsite/doc/trans\\_nutr2.PDF](http://www.santediabetemali.org/newsite/doc/trans_nutr2.PDF). (page consultée le 04/09/2005).
- 35
- 36
- 37
- 38
- 39 61. Wannamethee SG., Shaper AG. Weight change and duration of overweight and obesity in the incidence of type 2 diabetes. *Diabetes Care*; 1999, 22 : 1266-11272.
- 40
- 41 62. Bonita R., De Courten M., Dwyer T., Jamroski K., Winkelmann R. Surveillance des facteurs de risque des maladies non transmissibles : l'approche STEPwise de l'OMS. Résumé. Genève, Organisation mondiale de la Santé, 2001.
- 42
- 43 63. Eldelstein Sl., Knowler WC., Bain RP., Andres R., Barrett-Connor El., Dowse Gk. Et al.. Predictors of progression from impaired glucose tolerance to NIDDM : an analysis of six prospective studies. *Diabetes*; 1997, 46 (4) : 701-710.
- 44
- 45 64 Nishi Y., Fukushima M., Suzuki H., Ueda N., Tanigushi A., Nakai Y. et al. Insulin secretion and insulin sensitivity in Japanese subjects with impaired fasting glucose and isolated fasting hyperglycemia. *Diabetes Research and Clinical Practice*; October 2005, 70 (1) : 46-5 2.
- 46
- 47
- 48
- 49
- 50 65. WHO.
- 51
- 52
- 53
- 54
- 55
- 56
- 57
- 58
- 59
- 60

- 1  
2  
3  
4  
5 [http://www.WHO.int/bmi/index.jsp?introlage=intro\\_3.html](http://www.WHO.int/bmi/index.jsp?introlage=intro_3.html) (page consultée le 02/11/2006).
- 6 66. Belgian Association for the Study of Obesity. Directives pour le traitement de  
7 l'excès de poids. *Obésité*, 2001 : 10-19.
- 8 67. Zimmet P., Alberti G., La definition de la FID : Pourquoi un consensus global est  
9 nécessaire. *Diabetes voice*, 2006, 51 : 11-14.
- 10 68.. World Heath Organisation. Hypertension Guidelines, *Journal of Hypertension*; 1999;  
11 17 : 151-183.
- 12 69. Sacks D., Bruns D., Goldstein D., MacLaren N., McDonald J., Parrot M. Guidelines  
13 and Recommendations for Laboratory Analysis in the Diagnosis and Management of  
14 Diabetes Mellitus. *Diabetes Care*, 2002 ; vol 29 (4) : 750-786.
- 15 70. .Levy P. S., Lemeshow S. Sampling for health Professionals. California : Lifetimes  
16 Learning Publications, 1980 : 320.
- 17 71 De Clerck M. Le diabète en Afrique. Kinshasa.: Médiaspaul,. 2000 : 144.
- 18 72. Cockcroft Dw., Gault MH. Prediction of creatinine clearance from serum creatinine.  
19 *Nephros*, 1976; 1976, 16 : 31-41.
- 20 73. National Kidney Founfation. Clinical Practice Guidelines for chronic kidney disease.  
21 Evaluation, classification and stratification. *Am J Kidney Disease*, 2002.
- 22  
23  
24  
25  
26  
27  
28  
29  
30  
31  
32  
33  
34  
35  
36  
37  
38  
39  
40  
41  
42  
43  
44  
45  
46  
47  
48  
49  
50  
51  
52  
53  
54  
55  
56  
57  
58  
59  
60

1  
2  
3  
4  
5  
6  
7  
8  
9  
10  
11  
12  
13  
14  
15  
16  
17  
18  
19  
20  
21  
22  
23  
24  
25  
26  
27  
28  
29  
30  
31  
32  
33  
34  
35  
36  
37  
38  
39  
40  
41  
42  
43  
44  
45  
46  
47  
48  
49  
50  
51  
52  
53  
54  
55  
56  
57  
58  
59  
60

For peer review only

# ANNEXES

**Noms des superviseurs**

1. Muyer Marie-Claire investigateur principal
2. Makulo Risasi
3. Mvitu Moïse
4. Kimenyembwe Wivine
5. Mandja Makasa

**Noms des enquêteurs**

1. Nsoma Malou
2. Baka
3. Pélagie
4. Mamie
5. Bungudi
6. Nsiala
7. Jérémie
8. Baron
9. Makiese
10. Espérance
11. Bibiche
12. Matondo
13. Luntadila Anita

**Noms des infirmiers des centres de santé**

1. Mireille
- 2.

**Noms des infirmiers ophtalmologiques**

1. Elalie
2. Marie-José
3. Mosantu
4. Luntadila
5. Yvonne

**Noms des laborantins**

1. Simon

**Noms des codificateurs**

1. Mandja Makasa
2. Mulengi Evelyne
3. Kibuya Charlotte

1  
2  
3 4. Tshala Lucie

4 5. Butungu Don Béni

6  
7 **Noms des saisisseurs**

8  
9 1. Mutombo Gaston

10 2. Dr Mandja Makasa

11 3. Titi  
12  
13  
14  
15  
16  
17  
18  
19  
20  
21  
22  
23  
24  
25  
26  
27  
28  
29  
30  
31  
32  
33  
34  
35  
36  
37  
38  
39  
40  
41  
42  
43  
44  
45  
46  
47  
48  
49  
50  
51  
52  
53  
54  
55  
56  
57  
58  
59  
60

For peer review only



Recopier la copie modifiée

**QUESTIONNAIRE DE L'ENQUETE SUR LA PREVALENCE  
DU DIABETE A KISANTU**

N° Fiche:.....  
N° Code du sujet.....Nom du centre.....Aire de Santé.....

Equipe de travail

| MEMBRES         | NOMS ET PRENOMS | DATE |
|-----------------|-----------------|------|
| Enquêteur       |                 |      |
| Superviseur     |                 |      |
| Codificateur    |                 |      |
| Agent de saisie |                 |      |

I. **INTERVIEW**

Date de l'interview :  
...../...../.....

| N° |                                                                                                                                                          | CODE                     |
|----|----------------------------------------------------------------------------------------------------------------------------------------------------------|--------------------------|
| 1. | Langue de l'interview<br>1. Français<br>2. Kikongo<br>3. Lingala<br>4. Autres -----                                                                      | <input type="checkbox"/> |
| 2. | 2.1. Résultats de l'interview<br>1. rempli<br>2. refus si oui allez à 2.1.<br>2.1. raison du refus .....<br>3. pas de répondant<br><br>si 3 allez au 2.2 | <input type="checkbox"/> |
|    | 2.2. cherché à domicile 1. oui 2. non                                                                                                                    | <input type="checkbox"/> |

II. IDENTIFICATION

|     |                                                                                                                  |                          |
|-----|------------------------------------------------------------------------------------------------------------------|--------------------------|
| 3.  | Nom : ..... Prénom : .....                                                                                       |                          |
| 4.  | 4.1 Date de naissance exacte ..... / ..... / .....<br>Jours                      mois                      année | <input type="checkbox"/> |
|     | 4.2. Année de naissance estimée -----                                                                            | <input type="checkbox"/> |
|     | 4.3. Ne sait pas: 77                                                                                             | <input type="checkbox"/> |
| 5.  | Age (ans) :                                                                                                      | <input type="checkbox"/> |
| 6.  | Sexe    1. <input type="checkbox"/> M            2. <input type="checkbox"/> F                                   | <input type="checkbox"/> |
| 7.  | Date de dernières règles ..... : ..... / ..... : ..... / .....                                                   |                          |
| 8.  | Etat civil :    1.marié            2.célibataire            3.divorcé            4.veuf./ ve<br>5. Union libre   | <input type="checkbox"/> |
| 9.  | Ethnie : .....                                                                                                   | <input type="checkbox"/> |
| 10. | Religion : .....                                                                                                 | <input type="checkbox"/> |
| 11. | Commune ou secteur : .....                                                                                       | <input type="checkbox"/> |
| 12. | Quartier : .....                                                                                                 | <input type="checkbox"/> |
| 13. | Avenue : .....                                                                                                   | <input type="checkbox"/> |
| 14. | Téléphone: .....                                                                                                 |                          |

III. STATUT SOCIAL ET MODE DE VIE

|     | QUESTIONS                       | REPONSES                                                                                                                                         | CODE                     |
|-----|---------------------------------|--------------------------------------------------------------------------------------------------------------------------------------------------|--------------------------|
| 15. | Quel est votre niveau d'étude ? | 1 Aucun<br>2. Ecole primaire<br>3. Ecole secondaire<br>4. Niveau graduat<br>5. Niveau licence<br>6. Niveau post universitaire<br>77. ne sait pas | <input type="checkbox"/> |



|     | QUESTIONS                                                                                                      | REponses                                                                                                                                                                                                                                                                                                            | CODE                     |
|-----|----------------------------------------------------------------------------------------------------------------|---------------------------------------------------------------------------------------------------------------------------------------------------------------------------------------------------------------------------------------------------------------------------------------------------------------------|--------------------------|
| 16. | Quelle est votre profession ?                                                                                  | 1. employé de l'Etat<br>2. employé dans le privé<br>3. indépendant (travaillent à leur propre compte)<br>4. cultivateur<br>5. éleveur de volaille ou de bétail<br>6. étudiant / élève<br>7. bénévole<br>8. chômeur<br>9. ménagère<br>10. sans-profession (chargeur, manoeuvre...)<br>11. domestique<br>12. invalide | <input type="checkbox"/> |
| 17. | Comment vous déplacez-vous habituellement de votre maison à votre lieu d'activité (église, travail, école...)? | 1. le pied<br>2. le vélo<br>3. la voiture<br>4. autre.....                                                                                                                                                                                                                                                          | <input type="checkbox"/> |
| 18. | Combien de temps marchez-vous à pied chaque jour en minute ?                                                   | -----                                                                                                                                                                                                                                                                                                               | <input type="checkbox"/> |

IV. ANTECEDENTS HEREDITAIRES

|     | QUESTIONS                                                                                  | REponses                                                                                   | CODE                     |
|-----|--------------------------------------------------------------------------------------------|--------------------------------------------------------------------------------------------|--------------------------|
| 19. | 19.1. Y a-t-il des diabétiques dans la famille ?                                           | 1. oui 2. non<br>si 2 allez à 20.1.                                                        | <input type="checkbox"/> |
|     | 19.2. Qui ?                                                                                | 1..Père 2..Mère 3. Frère / Sœur<br>4. Conjoint (e) 5. Enfants<br>6. Autres 77. Ne sait pas | <input type="checkbox"/> |
| 20. | 20.1. Buvez-vous de l'alcool ? (wisky, lunguila, lotoko, bière, nsamba, mbulu, nzimbaz...) | 1. oui 2. non 3. sevré<br>si 1 allez à 20.2.<br>si 3 allez à 20.3.                         | <input type="checkbox"/> |

|     | QUESTIONS                     | REponses                                                         | CODE                                  |                          |
|-----|-------------------------------|------------------------------------------------------------------|---------------------------------------|--------------------------|
| 21. | 20.2. Quelle quantité ?       | 1. fréquemment                                                   | <input type="checkbox"/>              |                          |
|     |                               | ..... de verres à bambou / sem.                                  | <input type="checkbox"/>              |                          |
|     |                               | .....bouteille / mois                                            | <input type="checkbox"/>              |                          |
|     |                               | 2. occasionnellement                                             | <input type="checkbox"/>              |                          |
|     |                               | 20.3. Sevré depuis combien de mois ?                             | ..... mois                            | <input type="checkbox"/> |
|     |                               | 20.4. Fumez-vous du tabac ? (cigarette, tabac à priser, chanvre) | 1. oui 2. non 3. sevré                | <input type="checkbox"/> |
|     |                               |                                                                  | si 1 allez à 20.4.a et 20.b.          |                          |
|     |                               |                                                                  | si 3 allez à 20.4. c                  |                          |
|     |                               | 20.4. a Quelle quantité ?                                        | 1. fréquemment                        | <input type="checkbox"/> |
|     |                               | 20.4. b Quelle quantité ?                                        | ..... tiges ou pincée par sem.        | <input type="checkbox"/> |
|     |                               |                                                                  | ..... tiges ou pincée par mois        | <input type="checkbox"/> |
|     | 22.                           |                                                                  | 2. occasionnellement                  | <input type="checkbox"/> |
|     |                               | .....mois                                                        | <input type="checkbox"/>              |                          |
|     |                               | 21. 20.4. c Sevré depuis combien de mois ?                       | .....mois                             | <input type="checkbox"/> |
|     |                               | 21.1 Etes-vous hypertendu ?                                      | 1. oui 2. non<br>si 2 allez au 22.1   | <input type="checkbox"/> |
|     |                               | 21.2 Depuis quand ? (ans )                                       | ..... mois                            | <input type="checkbox"/> |
|     |                               | 21.3. Sous traitement pour l'hypertension artérielle ?           | 1. oui 2. non<br>si oui allez au 21.4 | <input type="checkbox"/> |
|     |                               | 21.4. Lequel ?                                                   | .....                                 | <input type="checkbox"/> |
|     | 22.1 Etes-vous diabétique?    | 1. oui 2. non<br>si 1 allez au 20.2                              | <input type="checkbox"/>              |                          |
|     | 22.2 Depuis quand ? (ans )    | ..... mois                                                       | <input type="checkbox"/>              |                          |
|     | 22.3. Sous traitement pour le | 1. oui 2. non<br>si 2 allez au 23                                | <input type="checkbox"/>              |                          |

|  |                          |       |                          |
|--|--------------------------|-------|--------------------------|
|  | diabète<br>22.4 Lequel ? | ----- | <input type="checkbox"/> |
|--|--------------------------|-------|--------------------------|

V.

ANTECEDENTS GYNECO-OBSTETRICAUX

|     | QUESTIONS                                                                                                                                                                                                                                                                                                                                                                            | REPOSES                                                                                                              | CODE                                                                                                                                                            |
|-----|--------------------------------------------------------------------------------------------------------------------------------------------------------------------------------------------------------------------------------------------------------------------------------------------------------------------------------------------------------------------------------------|----------------------------------------------------------------------------------------------------------------------|-----------------------------------------------------------------------------------------------------------------------------------------------------------------|
| 23. | <p><b>Pour les femmes seulement</b></p> <p>23.1 Avez vous déjà été enceinte ?</p> <p>23.2. Combien de mort-né avez-vous eu ?</p> <p>23.3. Le poids du plus gros bébé à la naissance était de combien ?</p> <p>23.4. Combien de malformés avez-vous eu ?</p> <p>23.5. Combien d'avortements avez-vous eu?</p> <p>23.6. Avez-vous eu le diabète pendant une grossesse antérieure ?</p> | <p>1. oui 2. non</p> <p>si 2 allez à 24</p> <p>-----</p> <p>-----</p> <p>-----</p> <p>-----</p> <p>1. oui 2. non</p> | <p><input type="checkbox"/></p> <p><input type="checkbox"/></p> <p><input type="checkbox"/></p> <p><input type="checkbox"/></p> <p><input type="checkbox"/></p> |

VI

LES CARACTERISTIQUES ALIMENTAIRES

|     | QUESTIONS                                                                                                                                                                               | REPOSES                                                                                                                                                                                                                                                                                                           | CODE                                                                                            |
|-----|-----------------------------------------------------------------------------------------------------------------------------------------------------------------------------------------|-------------------------------------------------------------------------------------------------------------------------------------------------------------------------------------------------------------------------------------------------------------------------------------------------------------------|-------------------------------------------------------------------------------------------------|
| 24. | <p>Combien de jours par semaine consommez-vous des sucres raffinés?</p> <p>24. 1 du sucre de canne</p> <p>24. 2 de la canne à sucre</p> <p>24..3. des sucreries (bonbons, biscuits,</p> | <p>1. 0 jour (jamais)</p> <p>2. 1-2 jour (occasionnel)</p> <p>3. 3-4 jours (modérée)</p> <p>4. 5-7 jours (souvent)</p> <p>5. périodique</p> <p>1. 0 jour (jamais)</p> <p>2. 1-2 jour (occasionnel)</p> <p>3. 3-4 jours (modérée)</p> <p>4. 5-7 jours (souvent)</p> <p>5. périodique</p> <p>1. 0 jour (jamais)</p> | <p><input type="checkbox"/></p> <p><input type="checkbox"/></p> <p><input type="checkbox"/></p> |

1  
2  
3  
4  
5  
6  
7  
8  
9  
10  
11  
12  
13  
14  
15  
16  
17  
18  
19  
20  
21  
22  
23  
24  
25  
26  
27  
28  
29  
30  
31  
32  
33  
34  
35  
36  
37  
38  
39  
40  
41  
42  
43  
44  
45  
46  
47  
48  
49  
50  
51  
52  
53  
54  
55  
56  
57  
58  
59  
60

N° Fiche.....N° Code..... Nom du centre..... Aire de santé .....

|    |        |                                                                                                     |                                                                                                                      |                          |
|----|--------|-----------------------------------------------------------------------------------------------------|----------------------------------------------------------------------------------------------------------------------|--------------------------|
|    |        |                                                                                                     | 4. 5-7 jours (souvent)<br>5. périodique                                                                              |                          |
|    | 24.4.. | des boissons sucrées                                                                                | 1. 0 jour (jamais)<br>2. 1-2 jour (occasionnel)<br>3. 3-4 jours (modérée)<br>4. 5-7 jours (souvent)<br>5. périodique | <input type="checkbox"/> |
| 25 |        | Combien de jours par semaine consommez-vous des graisses ?                                          |                                                                                                                      |                          |
|    | 25.1   | de la viande de porc ou de chèvre ou des croupions de dindon ou des abats (tripes, rognon, poumons) | 1. 0 jour (jamais)<br>2. 1-2 jour (occasionnel)<br>3. 3-4 jours (modérée)<br>4. 5-7 jours (souvent)<br>5. périodique | <input type="checkbox"/> |
|    | 25.2   | du poisson                                                                                          | 1. 0 jour (jamais)<br>2. 1-2 jour (occasionnel)<br>3. 3-4 jours (modérée)<br>4. 5-7 jours (souvent)<br>5. périodique | <input type="checkbox"/> |
|    | 25.3   | des œufs                                                                                            | 1. 0 jour (jamais)<br>2. 1-2 jour (occasionnel)<br>3. 3-4 jours (modérée)<br>4. 5-7 jours (souvent)<br>5. périodique | <input type="checkbox"/> |
|    | 25.4   | des arachides                                                                                       | 1. 0 jour (jamais)<br>2. 1-2 jour (occasionnel)<br>3. 3-4 jours (modérée)<br>4. 5-7 jours (souvent)<br>5. périodique | <input type="checkbox"/> |
|    | 25.5   | du fumbwa                                                                                           | 1. 0 jour (jamais)<br>2. 1-2 jour (occasionnel)<br>3. 3-4 jours (modérée)<br>4. 5-7 jours (souvent)<br>5. périodique | <input type="checkbox"/> |

|    |                                         |                           |                          |
|----|-----------------------------------------|---------------------------|--------------------------|
| 1  |                                         |                           |                          |
| 2  |                                         |                           |                          |
| 3  |                                         |                           |                          |
| 4  |                                         |                           |                          |
| 5  | 25.6. ou une autre nourriture à base de | 0 jour (jamais)           |                          |
| 6  | mwambe                                  | 1. 1-2 jour (occasionnel) | <input type="checkbox"/> |
| 7  |                                         | 2. 3-4 jours (modérée)    |                          |
| 8  |                                         | 3. 5-7 jours (souvent)    |                          |
| 9  |                                         | 4. périodique             |                          |
| 10 |                                         |                           |                          |
| 11 |                                         |                           |                          |
| 12 | 25.7 des avocats                        | 1. 0 jour (jamais)        |                          |
| 13 |                                         | 2. 1-2 jour (occasionnel) | <input type="checkbox"/> |
| 14 |                                         | 3. 3-4 jours (modérée)    |                          |
| 15 |                                         | 4. 5-7 jours (souvent)    |                          |
| 16 |                                         | 5. périodique             |                          |
| 17 |                                         |                           |                          |
| 18 |                                         |                           |                          |
| 19 |                                         |                           |                          |
| 20 |                                         |                           |                          |
| 21 | 25.8 des nsafus                         | 1. 0 jour (jamais)        |                          |
| 22 |                                         | 2. 1-2 jour (occasionnel) | <input type="checkbox"/> |
| 23 |                                         | 3. 3-4 jours (modérée)    |                          |
| 24 |                                         | 4. 5-7 jours (souvent)    |                          |
| 25 |                                         | 5. périodique             |                          |
| 26 |                                         |                           |                          |
| 27 |                                         |                           |                          |
| 28 | 25.9 l'huile d'arachide ou de soja      | 1. 0 jour (jamais)        |                          |
| 29 |                                         | 2. 1-2 jour (occasionnel) | <input type="checkbox"/> |
| 30 |                                         | 3. 3-4 jours (modérée)    |                          |
| 31 |                                         | 4. 5-7 jours (souvent)    |                          |
| 32 |                                         | 5. périodique             |                          |
| 33 |                                         |                           |                          |
| 34 |                                         |                           |                          |
| 35 | 25.10 de l'huile de palme               | 1. 0 jour (jamais)        |                          |
| 36 |                                         | 2. 1-2 jour (occasionnel) | <input type="checkbox"/> |
| 37 |                                         | 3. 3-4 jours (modérée)    |                          |
| 38 |                                         | 4. 5-7 jours (souvent)    |                          |
| 39 |                                         | 5. périodique             |                          |
| 40 |                                         |                           |                          |
| 41 |                                         |                           |                          |
| 42 |                                         |                           |                          |
| 43 | 25.11 de la margarine                   | 1. 0 jour (jamais)        |                          |
| 44 |                                         | 2. 1-2 jour (occasionnel) | <input type="checkbox"/> |
| 45 |                                         | 3. 3-4 jours (modérée)    |                          |
| 46 |                                         | 4. 5-7 jours (souvent)    |                          |
| 47 |                                         | 5. périodique             |                          |
| 48 |                                         |                           |                          |
| 49 |                                         |                           |                          |
| 50 | 25.12 de beurre                         | 1. 0 jour (jamais)        |                          |
| 51 |                                         | 2. 1-2 jour (occasionnel) | <input type="checkbox"/> |
| 52 |                                         | 3. 3-4 jours (modérée)    |                          |
| 53 |                                         | 4. 5-7 jours (souvent)    |                          |
| 54 |                                         | 5. périodique             |                          |
| 55 |                                         |                           |                          |
| 56 |                                         |                           |                          |
| 57 |                                         |                           |                          |
| 58 |                                         |                           |                          |
| 59 |                                         |                           |                          |
| 60 |                                         |                           |                          |



|      | QUESTIONS                                                                                                                                                                                                                                                                                                                              | REponses                                                                                                                                                                                                                                                                                                                                                                                                                                                                                                                                                                                                                                                                                                                                                                                                                                                                      | CODE                                                                                                                                                                                                                                                                                                                                                            |
|------|----------------------------------------------------------------------------------------------------------------------------------------------------------------------------------------------------------------------------------------------------------------------------------------------------------------------------------------|-------------------------------------------------------------------------------------------------------------------------------------------------------------------------------------------------------------------------------------------------------------------------------------------------------------------------------------------------------------------------------------------------------------------------------------------------------------------------------------------------------------------------------------------------------------------------------------------------------------------------------------------------------------------------------------------------------------------------------------------------------------------------------------------------------------------------------------------------------------------------------|-----------------------------------------------------------------------------------------------------------------------------------------------------------------------------------------------------------------------------------------------------------------------------------------------------------------------------------------------------------------|
| 27.. | <p>2.7. Combien de fois par semaine mangez-vous des amidons ?</p> <p>2.7.1. la farine de millet ou grain ?</p> <p>2.7.2. la farine de maïs ?</p> <p>2.7.3. la farine de manioc seule ?</p> <p>2.7.4. du manioc cru</p> <p>2.7.5. le mélange de farine de maïs avec le manioc ?</p> <p>2.7.6. la chikwange ?</p> <p>2.7.7. le riz ?</p> | <p>1. 0 jour ( jamais)</p> <p>2. 1-2 jour (occasionnel)</p> <p>3. 3-4 jours (modérée)</p> <p>4. 5-7 jours (souvent)</p> <p>5. périodique</p> <p>1. 0 jour ( jamais)</p> <p>2. 1-2 jour (occasionnel)</p> <p>3. 3-4 jours (modérée)</p> <p>4. 5-7 jours (souvent)</p> <p>5. périodique</p> <p>1. 0 jour ( jamais)</p> <p>2. 1-2 jour (occasionnel)</p> <p>3. 3-4 jours (modérée)</p> <p>4. 5-7 jours (souvent)</p> <p>5. périodique</p> <p>1. 0 jour ( jamais)</p> <p>2. 1-2 jour (occasionnel)</p> <p>3. 3-4 jours (modérée)</p> <p>4. 5-7 jours (souvent)</p> <p>5. périodique</p> <p>1. 0 jour ( jamais)</p> <p>2. 1-2 jour (occasionnel)</p> <p>3. 3-4 jours (modérée)</p> <p>4. 5-7 jours (souvent)</p> <p>5. périodique</p> <p>1. 0 jour ( jamais)</p> <p>2. 1-2 jour (occasionnel)</p> <p>3. 3-4 jours (modérée)</p> <p>4. 5-7 jours (souvent)</p> <p>5. périodique</p> | <p><input type="checkbox"/></p> |

|    |                             |                           |                          |
|----|-----------------------------|---------------------------|--------------------------|
| 1  | 2.7.8. la banane plantain ? | 1. 0 jour (jamais)        | <input type="checkbox"/> |
| 2  |                             | 2. 1-2 jour (occasionnel) |                          |
| 3  |                             | 3. 3-4 jours (modérée)    |                          |
| 4  | 2.7.9. la patate douce ?    | 4. 5-7 jours (souvent)    | <input type="checkbox"/> |
| 5  |                             | 5. périodique             |                          |
| 6  |                             | 1. 0 jour (jamais)        |                          |
| 7  |                             | 2. 1-2 jour (occasionnel) |                          |
| 8  |                             | 3. 3-4 jours (modérée)    |                          |
| 9  | 2.7.10. le taro ?           | 4. 5-7 jours (souvent)    | <input type="checkbox"/> |
| 10 |                             | 5. périodique             |                          |
| 11 |                             | 1. 0 jour (jamais)        |                          |
| 12 |                             | 2. 1-2 jour (occasionnel) |                          |
| 13 |                             | 3. 3-4 jours (modérée)    |                          |
| 14 |                             | 4. 5-7 jours (souvent)    | <input type="checkbox"/> |
| 15 |                             | 5. périodique             |                          |
| 16 |                             | 1. 0 jour (jamais)        |                          |
| 17 |                             | 2. 1-2 jour (occasionnel) |                          |
| 18 |                             | 3. 3-4 jours (modérée)    |                          |
| 19 |                             | 4. 5-7 jours (souvent)    | <input type="checkbox"/> |
| 20 |                             | 5. périodique             |                          |
| 21 |                             | 1. 0 jour (jamais)        |                          |
| 22 |                             | 2. 1-2 jour (occasionnel) |                          |
| 23 |                             | 3. 3-4 jours (modérée)    |                          |
| 24 |                             | 4. 5-7 jours (souvent)    | <input type="checkbox"/> |
| 25 |                             | 5. périodique             |                          |
| 26 |                             | 1. 0 jour (jamais)        |                          |
| 27 |                             | 2. 1-2 jour (occasionnel) |                          |
| 28 |                             | 3. 3-4 jours (modérée)    |                          |
| 29 |                             | 4. 5-7 jours (souvent)    | <input type="checkbox"/> |
| 30 |                             | 5. périodique             |                          |
| 31 |                             | 1. 0 jour (jamais)        |                          |
| 32 |                             | 2. 1-2 jour (occasionnel) |                          |
| 33 |                             | 3. 3-4 jours (modérée)    |                          |

VII. IMENSURATIONS

| N  | MESURES               | REPONSES          | CODE                     |                            |                          |                            |                          |
|----|-----------------------|-------------------|--------------------------|----------------------------|--------------------------|----------------------------|--------------------------|
| 34 | 28.1. Poids en kg     | -----             | <input type="checkbox"/> |                            |                          |                            |                          |
| 35 |                       | 28.2 Taille en cm | -----                    | <input type="checkbox"/>   |                          |                            |                          |
| 36 |                       |                   | 28.3. BMI kg / m2        | -----                      | <input type="checkbox"/> |                            |                          |
| 37 |                       |                   |                          | 28.4. Tour de taille en cm | -----                    | <input type="checkbox"/>   |                          |
| 38 |                       |                   |                          |                            | 28.5 TA                  | -----                      | <input type="checkbox"/> |
| 39 |                       |                   |                          |                            |                          | 28.51 TAS en mm de Hg (un) | -----                    |
| 40 | 28.52 TAD en mm de Hg | -----             | <input type="checkbox"/> |                            |                          |                            |                          |
| 41 |                       | .                 | -----                    | <input type="checkbox"/>   |                          |                            |                          |
| 42 |                       |                   |                          |                            |                          |                            |                          |
| 43 |                       |                   |                          |                            |                          |                            |                          |
| 44 |                       |                   |                          |                            |                          |                            |                          |
| 45 |                       |                   |                          |                            |                          |                            |                          |
| 46 |                       |                   |                          |                            |                          |                            |                          |
| 47 |                       |                   |                          |                            |                          |                            |                          |
| 48 |                       |                   |                          |                            |                          |                            |                          |
| 49 |                       |                   |                          |                            |                          |                            |                          |
| 50 |                       |                   |                          |                            |                          |                            |                          |
| 51 |                       |                   |                          |                            |                          |                            |                          |
| 52 |                       |                   |                          |                            |                          |                            |                          |
| 53 |                       |                   |                          |                            |                          |                            |                          |
| 54 |                       |                   |                          |                            |                          |                            |                          |
| 55 |                       |                   |                          |                            |                          |                            |                          |
| 56 |                       |                   |                          |                            |                          |                            |                          |
| 57 |                       |                   |                          |                            |                          |                            |                          |
| 58 |                       |                   |                          |                            |                          |                            |                          |
| 59 |                       |                   |                          |                            |                          |                            |                          |
| 60 |                       |                   |                          |                            |                          |                            |                          |



1  
2  
3  
4  
5  
6  
7  
8  
9  
10  
11  
12  
13  
14  
15  
16  
17  
18  
19  
20  
21  
22  
23  
24  
25  
26  
27  
28  
29  
30  
31  
32  
33  
34  
35  
36  
37  
38  
39  
40  
41  
42  
43  
44  
45  
46  
47  
48  
49  
50  
51  
52  
53  
54  
55  
56  
57  
58  
59  
60

N° Fiche.....N° Code..... Nom du centre..... Aire de santé .....

|  |                                |  |                          |
|--|--------------------------------|--|--------------------------|
|  | 28.53 TAS en mm de Hg (deux)   |  | <input type="checkbox"/> |
|  | 28.54 TAD en mm de Hg          |  | <input type="checkbox"/> |
|  | 28.55. TAS en mm de Hg (trois) |  | <input type="checkbox"/> |
|  | 28.56 TAD en mm de Hg          |  | <input type="checkbox"/> |

VII. 2

L'EXAMEN AU MONOFILAMENT

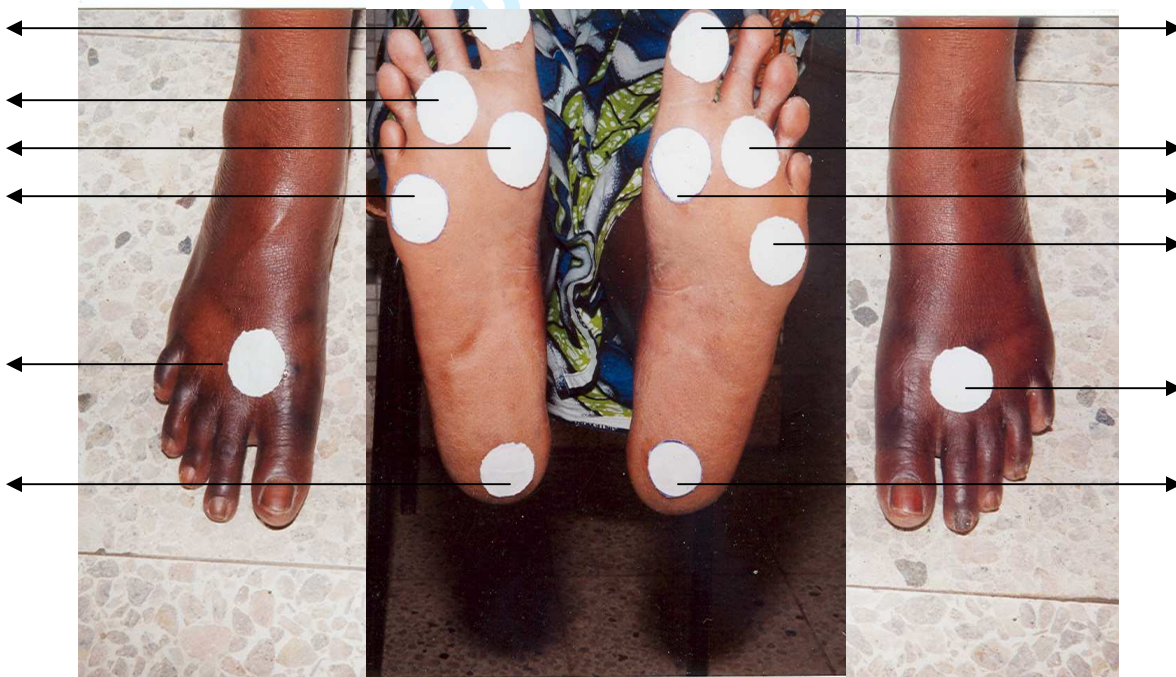

Pied Droit

Pied Gauche

Cotation

/

/

|     |                    |                                |                          |
|-----|--------------------|--------------------------------|--------------------------|
| 29. | Neuropathie        | 1. oui 2. non                  | <input type="checkbox"/> |
|     | 29.1 A quel pied ? | 1. Gauche 2. Droit 3. Les deux | <input type="checkbox"/> |

## VII. 3

## EXAMEN DE GLYCEMIE

| N   | EXAMENS                                                                                                                                    | REponses      | CODE                     |
|-----|--------------------------------------------------------------------------------------------------------------------------------------------|---------------|--------------------------|
| 30. | Jeûn depuis hier a 22 h                                                                                                                    | 1. oui 2. non | <input type="checkbox"/> |
|     | 30.1 Glycémie à jeun en mg % du<br><b>1<sup>er</sup> J</b><br>Date...../...../.....                                                        | -----         | <input type="checkbox"/> |
|     | 30.2. Glycémie à jeun en mg %<br>contrôle<br>Date...../...../.....                                                                         | -----         | <input type="checkbox"/> |
|     | 30.3 Glycémie à jeûn en mg % du<br><b>2<sup>er</sup> J</b> si Si glycémie à jeûn $\geq 126$ et<br>< ou = 199 mg %<br>Date...../...../..... | -----         | <input type="checkbox"/> |
|     | 30.4. Si glycémie à jeûn $\geq 100$ mg<br>% - 125 mg %<br>OGTT                                                                             | -----         | <input type="checkbox"/> |

## VII. 4

## EXAMENS NEPHROLOGIQUES

| N   | EXAMENS                                       | REponses                            | CODE                     |
|-----|-----------------------------------------------|-------------------------------------|--------------------------|
| 31. | <b>Si glycémie <math>\geq 100</math> mg %</b> |                                     |                          |
|     | 31.1 Albuminurie                              | 1. nég 2. + 3. ++ 4. +++<br>5. ++++ | <input type="checkbox"/> |
|     | 31.2 Microalbuminurie en mg/g                 | -----                               | <input type="checkbox"/> |
|     | 31.3 Créatininémie en mg/ml                   | -----                               | <input type="checkbox"/> |
|     | 31.4 Hématurie                                | :<br>1. négatif 2. positif          | <input type="checkbox"/> |
|     | 31.5 GB                                       | 1. négatif 2. positif               | <input type="checkbox"/> |
|     | 31.6 Nitrites                                 | 1. négatif 2. positif               | <input type="checkbox"/> |
|     |                                               |                                     | <input type="checkbox"/> |

N° Fiche.....N° Code..... Nom du centre.....Aire de santé .....

|  |                 |                       |                          |
|--|-----------------|-----------------------|--------------------------|
|  | 31.7 Glucosurie | 1. négatif 2. positif |                          |
|  | 31.9 Acétonurie | 1. négatif 2. positif | <input type="checkbox"/> |

VII. 5

EXAMENS OPHTALMOLOGIQUES

| N   | EXAMENS                                                                                                                                | REPONSES                            | CODE                     |
|-----|----------------------------------------------------------------------------------------------------------------------------------------|-------------------------------------|--------------------------|
| 32. | Si c'est une femme :<br>Allaitez-vous ?                                                                                                | 1 oui 2. non                        | <input type="checkbox"/> |
| 33. | ATCD                                                                                                                                   | Si 2 allez au 33                    |                          |
|     | 33.1 Avez-vous déjà fait un examen ophtalmologique?                                                                                    | 1. oui 2. non<br>si 2 allez au 33.3 | <input type="checkbox"/> |
|     | 33.2 Quel est la date du dernier examen ophtalmologique? (année)                                                                       | 77. ne sait pas                     | <input type="checkbox"/> |
|     | 33.3 Avez-vous déjà subit une chirurgie de la cataracte ?                                                                              | 1. oui 2. non<br>si 2 allez au 34   | <input type="checkbox"/> |
|     | 33.4 Quelle est la date de la chirurgie de la cataracte ? (année)<br>En cas de difficulté pour obtenir la réponse, appeler le Dr Mvitu | 77. ne sait pas                     | <input type="checkbox"/> |
| 34. | Acuité visuelle :                                                                                                                      | / 10                                | <input type="checkbox"/> |

N° Fiche.....N° Code..... Nom du centre.....Aire de santé .....

|  |                          |  |  |
|--|--------------------------|--|--|
|  | 35. Fond œil ( GREGOIRE) |  |  |
|--|--------------------------|--|--|

|                    |        |        |                          |
|--------------------|--------|--------|--------------------------|
| 38.1. Œil droit :  |        |        |                          |
| 381.1 Normal       | 1. oui | 2. non | <input type="checkbox"/> |
| 381.2 Rétinopathie | 1. oui | 2. non | <input type="checkbox"/> |
| 38.2. Œil gauche : |        |        |                          |
| 382.1 Normal       | 1. oui | 2. non | <input type="checkbox"/> |
| 382.2 Rétinopathie | 1. oui | 2. non | <input type="checkbox"/> |

Médecin .....

### EXAMENS OPHTALMOLOGIQUES

| N   | EXAMENS                        | REponses      | CODE                     |
|-----|--------------------------------|---------------|--------------------------|
| 36. | Pression intraoculaire ( PIO ) |               |                          |
|     | 38.1 Œil droit                 | mmHg          | <input type="checkbox"/> |
|     | 38.2. Œil gauche               | mmHg          | <input type="checkbox"/> |
| 37  | Fond œil                       |               |                          |
| .   | 40.1. Œil droit : RD           | 1. oui 2. non | <input type="checkbox"/> |
|     | Si oui                         |               |                          |
|     | 1. Rétinopathie stade 0        |               | <input type="checkbox"/> |
|     | 2. Rétinopathie stade 1        |               |                          |
|     | 3. Rétinopathie stade 2        |               |                          |
|     | 4. Rétinopathie stade 3        |               |                          |
|     | 5. Rétinopathie stade 4        |               |                          |
|     | 40.2. Œil gauche : RD          |               |                          |
|     | Si oui                         | 1. oui 2. non | <input type="checkbox"/> |
|     | 1. Rétinopathie stade 0        |               | <input type="checkbox"/> |
|     | 2. Rétinopathie stade 1        |               |                          |
|     | 3. Rétinopathie stade 2        |               |                          |
|     | 4. Rétinopathie stade 3        |               |                          |
|     | 5. Rétinopathie stade 4        |               |                          |

Annexe n° 3

Nom.....Prénom.....

## FORMULAIRE DE CONSENTEMENT ECLAIRE

### **Etude de la prévalence du diabète sucré et de ses complications**

Date :..... /..... /.....

Investigateur : Dr. Muyer Marie-Claire : ESP / UNIKIN : 0811452711

Madame, Monsieur,

Vous avez été choisi au hasard pour participer à cette étude que nous vous expliquons. Après nous vous demanderons si vous acceptez que nous fassions l'étude de signer ce formulaire. Les renseignements que vous donnerez seront confidentiels et seront utilisés pour la recherche.

#### 1. Pourquoi faisons cette étude ?

C'est pour dépister le diabète et ses complications.

#### 2. Comment se fera cette étude ?

- 2.1. On notera sur une fiche votre identité, âge, sexe, adresse, vos activités, vos antécédents et ceux de votre famille, Votre nom sera caché et votre fiche sera gardée par le superviseur, si vous êtes un ancien malade vos résultats seront transmis dans votre dossier à l'hôpital.
- 2.2. On va mesurer votre poids, votre taille, votre circonférence abdominale, votre tension artérielle dans un bureau en privé et vos pieds.
- 2.3. On fera des prélèvements de sang au doigt pour chercher le diabète (glycémie). Si votre glycémie est à partir de 126 mg %, vous ferez un deuxième examen de sang (creatinine) et vous donnerez les urines pour chercher les complications du diabète au niveau des reins (albuminurie, microalbuminurie). On vous demandera aussi de répéter l'examen de sucre le lendemain.
- 2.4. On examinera vos yeux trois ou quatre fois pour chercher les complications du diabète, cela demandera peut-être que vous puissiez attendre plus longtemps.

#### 3. L'étude comporte-t-elle des avantages ? Oui

- 3.1. Vous bénéficierez d'un dépistage gratuit du diabète et de ses complications
- 3.2. Les complications peuvent exister dans votre corps pendant des années sans que vous ne le sachiez et créer des dégâts. Vous aurez la possibilité de découvrir précocement ces complications.

- 1  
2  
3  
4 3.3. Pour les maladies découvertes en rapport avec l'étude : diabète, hypertension,  
5 maladie des reins, maladie des yeux, les premiers soins vous seront assurés.  
6 3.4. Pour les cas de complications au niveau des yeux, vous serez référés à Kinshasa avec  
7 un tarif réduit pour le traitement au laser, vous recevrez un billet vous indiquant ou  
8 aller avec le numéro de téléphone du Dr Mvitu.  
9 3.5. Si votre glycémie est entre 100 mg et 125 mg %, on vous demandera de répéter  
10 l'examen de sucre (glycémie) une fois par an.  
11 3.6. Vos infirmiers seront formés et continueront notre action après notre départ.

12  
13  
14 4. Quels sont les risques que l'on peut rencontrer au cours de l'étude ?

- 15  
16 4.1. Vous pourrez vous absenter de votre travail en demandant la permission  
17 4.2 Les prélèvements de sang peuvent entraîner une petite douleur.  
18 4.3. Un matériel non stérile peut donner une infection c'est pour cela que nous utiliserons  
19 un matériel pour chacun qui sera jeté juste après.  
20 4.4. La novésine utilisée pour l'examen des yeux peut, mais pas toujours :  
21 - donner des vertiges. Il faudra vous reposer 5 minutes après l'examen  
22 - donner une allergie si vous avez déjà eu une allergie aux anesthésiques locaux  
23 ex : pour une incision d'abcès...  
24 - donner une irritation qui va passer  
25 - donner une atteinte de l'épithélium cornéen. Ce risque est réduit par l'utilisation  
26 d'une seule goutte par œil.  
27 Ce produit a été testé plusieurs fois par le fabricant et est utilisé depuis plusieurs  
28 années.  
29 4.5 Le mydriaticum utilisé pour le F.O.(examen des yeux) peut entraîner des malaises  
30 mais pas toujours qui vont passer :  
31 - le picotement des yeux  
32 - la sécheresse de la bouche  
33 - un trouble au niveau des yeux ne vous permettant pas de conduire pendant au  
34 moins 4h.  
35 - une sensibilité excessive à la lumière.  
36 - des palpitations  
37 - des maux de tête  
38 - parfois vous empêcher de lire pendant quelques heures ou quelques jours.  
39  
40  
41  
42  
43  
44  
45 5. La femme enceinte ne fera pas partie de cette étude. La femme allaitante en fera partie  
46 mais ne fera pas les examens ophtalmologiques.  
47  
48  
49  
50  
51  
52  
53  
54  
55  
56  
57  
58  
59  
60

6. Votre consentement ?

Après que je vous ai expliqué clairement le déroulement de toute l'étude et tous les aspects négatifs et les bénéfiques, acceptez-vous de participer volontairement à cette étude en signant ce formulaire.

1.  OUI    2.  NON

Signature.....

ou

Empreinte digitale.....

Nom..... Prénom.....

LUKASA LU KUNDIMA YE FIONGUNUNA

### NSOSOLU YI KIMBEFO KI SUKADI YE MAMPASI MANI

Date :..... /..... /.....

Responsable : Dr. Muyer Marie-Claire : ESP / UNIKIN : 0811452711

Madame, Monsieur,

Ponamene mu kusala kintuadi ki nsosolu kimbefo kikitakuluengisa. Ku nima sa tukulomba keti lendele zola mu sa vo bambefo batula n'lembo mo luhasa lo mambu ma sa uta mena ma kinsueki ye mfumumena mu kufiongununa ye sosa nzila yi kimbefo.

1. Mu nki ndandu tutasadila mfiongununa yo ?

Mu diambu di kusengomuna kimbefo ki sukadi (diabète) ye bigonsa biani.

2. Bue sa kisadimina mfiongununa yo ?

2.1. Si basonika mo lukasa lo identité diaku : « mvula zaku, muana nkento go muana yakala, kifulu ki uzingila, ksalu ki usalanga, bimbefo bi ubela ntete ye bi bi famille diaku. Zina diaku si dilundama mu kinsueki ku nlandi go mbefo ntama una, makulu ma sa bamona mu ma examens sa bafila mau muna dossier diaku ku lupitalu.

2.2. Si umata ga kilo, si batesa ntela, luketu, si batala tension kuna bilu mu kinsueki. Ye malu

2.3. Si batala muna menga keti sukadi zizingi zina. Go sukadi diluta 124 mgr %, si bakulomba utadisa diaka menga mu kilumbu kilanda. Sa utadisa masuba mu kusosa bigonsa bi kanata diabete mu ma reins (albuminurie, microralbuminurie).

2.4. Si batalulula meso maku nkumbu 3 go zi ya mu kutala bigonsa binata kimbefo ki diabete, mu diambu dina si ukingila fioti bubuingi.

Ntangu zinkaka si baktela ukinga mu kutala keti batomene fimpa ma examens.

3. Kisalu kio kivuidi mfunu e ? Inga.

3.1. Si balufimpa mumpamba ye bimbefo sa bimonika.



- 1  
2  
3  
4  
5  
6  
7  
8  
9  
10  
11  
12  
13  
14  
15  
16  
17  
18  
19
- 3.2. Lendi kala ye nkakatani muna nitu aku ye konda kuzaya. Kansi ksalu kio si kikundula bimbefo bina muna nitu aku mu sa vo bimonika ye ma makimokina ntete go ma makusala kingonsa mu nitu.
  - 3.3. Ku bimbefo bisa bimonika-diabète-tension-hypertension, reins-mesu si balugana bilongo mu mpamba.
  - 3.4. Basibakala ye bimbefo bi meso, si babafila ku kinshasa mu kubaka bilongo mu ntalu fioti. Si balugana bi carte bi silunatanga konso ntangu ku lufimpu. Si batula muna carte n° di telephone di Docteur Mvitu ye si bakuzahisa nki lupitalu ufute bakila nkisi.
  - 3.5. Go sukadi muna menga zina mu ntalu 100mgr et 125 mgr. Si bakulomba diaka kani nkumbu tatu muna mvu.
  - 3.6. Si tulonga ba infirmier kadi go betu tuedi bau si bafula ksalu kio tuta sala beto.

20  
21  
22

4. Nki bigonsa bilendi kutuyisila muntangu yituta sala ksalu kio ?

- 23  
24  
25  
26  
27  
28  
29  
30  
31  
32  
33  
34  
35  
36  
37  
38  
39  
40  
41  
42  
43  
44  
45  
46  
47  
48  
49  
50  
51  
52  
53  
54  
55  
56  
57  
58  
59  
60
- 4.1 Lendi konda ksalu ye konda lomba n'sua.
  - 4.2. Muntangu babakanga menga ntumbu yina fi mpasi fioti isalanga .
  - 4.3. Go bisalulu kabina ye bunktiko bilendi kutugana bimbefo binzenza ye microbe. ntumbu zi situbakilanga menga konso ntangu situgetanga zo.
  - 4.4. Ma examen ma meso mama nkaka luse mazukisanga go mueni buna vundidi fioti.
    - Gunua kala bilongo bi bina nde bi kugana mfuki mu nitu? Go bikutukisi makuansa mu nitu?
    - Usala kala (allergie) nu anesthésie? Usalakala mfuki mu nitu mu mbakulu ntumbu ye inkisi mi kulekisa tolo.
    - Ma examen ma meso mama nkaka matusalanga, gana ma gananga bonsu nde kulemba fioti mais kakigonsako.
  - 4.5. Bilongu bisi tusadila ma examen ma meso maleni gana mambu kansi kama ki gonsaku :
    - Bonsu meso ma kotedi n'toto matayama
    - N'ua kuyuma fioti.
    - Ufeti mona fimpasi go ta tala n'temo (lumière)
    - Fimpasi fioti mu n'tu ye mbundu ntango zin'kaka mu kutanga meso mpasi ntangu nda (4 h)
  5. N'kua vumu lendi sadisa ma examens mô, kansi go ta yemika, lendi, yambula ku nima bilumbu lendi vutukila kuyemika.

1  
2  
3  
4  
5  
6  
7  
8  
9  
10  
11  
12  
13  
14  
15  
16  
17  
18  
19  
20  
21  
22  
23  
24  
25  
26  
27  
28  
29  
30  
31  
32  
33  
34  
35  
36  
37  
38  
39  
40  
41  
42  
43  
44  
45  
46  
47  
48  
49  
50  
51  
52  
53  
54  
55  
56  
57  
58  
59  
60

6. Luzolo lu ngeyi

Tuku tenduluedi ksalu kiâkulu kitufueti sala, ma examen mâkulu, ye nfunu m'avantage ye mambi., Bungangi nga beno lututela mu luzolo luenu lumboti keti lendi signer nkanda gogo ?

1.

2.

Signature .....

ou

Empreinte digitale.....

Annexe n° 4

**Messages de sensibilisation**

1 Cher papa, chère maman et cher jeune

**Le diabète** est une maladie grave et coûteuse due a une augmentation du sucre dans le sang.

Tout le monde peut l'attraper (riche ou pauvre, enfant comme adulte, homme ou femme ). Faisons nous dépister tôt pour éviter les multiples complications qu'il entraîne.

Un équipe des médecins et des infirmiers passera pour faire le dépistage dont la date vous sera communiquée le moment voulu.

2 .Cher papa, chère maman et cher jeune

**Le diabète** est une maladie grave et coûteuse due a une augmentation du sucre dans le sang.

Il ne guérit pas mais grâce à un traitement, le malade peut mener une vie normale. Il entraîne plusieurs complications.

Faisons nous dépister tôt pour éviter de devenir aveugle, attraper les maladies du cœur , des reins et autres infections.

Un équipe des médecins et des infirmiers passera pour faire le dépistage ont la date vous sera communiquée le moment voulu.

## Annexe n° 5

## LA FORMATION GENERALE

**Participants** : 10 infirmiers ( 2 par Centre de Santé) ; 25 enquêteurs ; 5 enquêteurs de réserve avec 5 laborantins qui viendront seulement le Jour 3 et tous les superviseurs.

| Dates     | Heures        | Formateurs            | Thèmes                                                                                                             |
|-----------|---------------|-----------------------|--------------------------------------------------------------------------------------------------------------------|
| 19/2/2007 | 8h - 9h       | Dr Muyer              | Accueil et présentation des participants                                                                           |
|           | 9h - 10h      | Dr Makulo             | L'HTA                                                                                                              |
|           | 10h - 10h10   | <i>Pause</i>          |                                                                                                                    |
|           | 10h10 - 11h10 | Dr Kimbondo           | Le diabète                                                                                                         |
|           | 11h10 - 12h   | Dr Makulo<br>Dr Muyer | Mensurations : Théorie<br>Le monofilament                                                                          |
|           | 12h - 12h30   | <i>Repas</i>          |                                                                                                                    |
|           | 13h - 16h     | Dr Makulo             | Mensurations: Théorie et pratique                                                                                  |
|           | 16h - 16h10   | <i>Pause</i>          |                                                                                                                    |
|           | 16h10 - 18h   | Dr Mvitu<br>Dr Muyer  | Les examens ophtalmologiques<br>Technique d'interview : Le formulaire de consentement + traduction Lingala-Kitandu |
| 20/2/2007 | 8H - 10H      | Dr Muyer              | Technique d'interview                                                                                              |
|           | 10h - 10h10   | <i>Pause</i>          |                                                                                                                    |
|           | 10h10 - 12h   | Dr Muyer              | Technique d'interview+traduction en langue vernaculaire                                                            |
|           | 12h -12h30    | <i>Repas</i>          |                                                                                                                    |
|           | 13h -17h      | Tous                  | Jeux de rôle                                                                                                       |
| 21/2/2007 | 8h - 10h      | Dr Muyer et Makulo    | Technique de laboratoire<br>Glycémie – OGTT – créatinine + Exercices                                               |
|           | 10h-10h10     | <i>Pause</i>          |                                                                                                                    |
|           | 10h10 – 12h   | Dr Muyer              | Rélevé parcellaire + identification des cibles, théorie                                                            |
|           | 12h - 12h30   | <i>Repas</i>          |                                                                                                                    |
|           | 13h - 17h     | Tous                  | Relevé parcellaire et Identification des cibles + exercices + évaluation du temps                                  |
| 220/2/07  | 8h – 10h      | Tous                  | Relevé parcellaire et Identification des cibles + exercices                                                        |
|           | 10h – 10h10   |                       | Pause                                                                                                              |
|           | 10h – 12h     | Tous                  | Simulation + test des enquêteurs                                                                                   |





Annexe 8 Carte de rendez-vous pour le Centre de Santé

# CARTE DE RENDEZ-VOUS

JOUR .....

CARTE N.....

NOM ET PRENOM .....

RENDEZ-VOUS

Le...../...../ Mars 2007

HEURE : A.....HEURES

AU CENTRE DE SANTÉ.....

Review only

1  
2  
3  
4  
5  
6  
7  
8  
9  
10  
11  
12  
13  
14  
15  
16  
17  
18  
19  
20  
21  
22  
23  
24  
25  
26  
27  
28  
29  
30  
31  
32  
33  
34  
35  
36  
37  
38  
39  
40  
41  
42  
43  
44  
45  
46  
47  
48  
49  
50  
51  
52  
53  
54  
55  
56  
57  
58  
59  
60

1  
2  
3  
4  
5  
6  
7  
8  
9  
10  
11  
12  
13  
14  
15  
16  
17  
18  
19  
20  
21  
22  
23  
24  
25  
26  
27  
28  
29  
30  
31  
32  
33  
34  
35  
36  
37  
38  
39  
40  
41  
42  
43  
44  
45  
46  
47  
48  
49

For peer review only



## RAPPORT PROVISOIRE DE L'ENQUETE SUR LA PREVALENCE DU DIABETE SUCRE A KISANTU EN 2007

| Dates   | Identification | Recuperation | Centre de Santé | Echantillon requis | Nombre de parcelles habitées | Pas de sondage | Echantillon attendu | Sujets recus | %    |
|---------|----------------|--------------|-----------------|--------------------|------------------------------|----------------|---------------------|--------------|------|
| 19-20   | 18             |              | Cederi Madimba  | 110                |                              | 1/5            |                     | 54           | 49   |
| 26-27   |                |              | Cederi Madimba  | 109                |                              |                |                     | 75           | 68,8 |
| 30      | 29             |              | Kikonka         | 443                | 983                          | 1/2<br>(2,2)   | 443                 | 115          |      |
| 31      |                |              | Kikonka         |                    |                              |                |                     | 82           |      |
| 2 / 04  |                |              | Kikonka         |                    |                              |                |                     | 71           |      |
| 3 / 04  |                |              | Kikonka         |                    |                              |                |                     | 76           |      |
| 4 / 04  |                |              | Kikonka         |                    |                              |                |                     | 18           |      |
| 5 / 04  | Cerphyto       | Kikonka      |                 |                    |                              |                |                     | 5            |      |
| 24 / 04 |                | Kikonka      |                 |                    |                              |                |                     | 35           |      |
|         |                |              |                 |                    |                              |                |                     | 402          | 90,7 |
| 6 / 04  | 5              |              | Cerphytoco      | 334                | 1819                         | 1/5<br>(5,4)   | 367                 | 139          |      |

## RAPPORT DE L'ENQUETE SUR LA PREVALENCE DU DIABETE SUCRE A KISANTU EN 2007

| Dates   | Identificatio<br>n | Recuperatio<br>n | Centre de<br>Santé | Echantillon<br>requis | Nombre de<br>parcelles<br>habitées | Pas de<br>sondage | Echantillon<br>attendu | Sujets<br>recus | %     |
|---------|--------------------|------------------|--------------------|-----------------------|------------------------------------|-------------------|------------------------|-----------------|-------|
| 7 / 04  |                    |                  | Cerphytoco         |                       |                                    |                   |                        | 94              |       |
| 9 / 04  |                    |                  | Cerphytoco         |                       |                                    |                   |                        | 69              |       |
| 10 / 04 |                    | Cerphytoco       |                    |                       |                                    |                   |                        | 3               |       |
| 11 / 04 |                    | Cerphytoco       |                    |                       |                                    |                   |                        | 8               |       |
|         |                    |                  |                    |                       |                                    |                   |                        | 313             | 93,71 |
| 11 / 04 | 10                 |                  | Ste Famille        | 404                   | 891                                | 1 / 2<br>(2,2)    | 445                    | 150             |       |
| 12 / 04 |                    |                  | Ste Famille        |                       |                                    |                   |                        | 105             |       |
| 13 / 04 |                    |                  | Ste Famille        |                       |                                    |                   |                        | 92              |       |
| 14 / 04 |                    | Ste Famille      | Ste Famille        |                       |                                    |                   |                        | 52              |       |
|         |                    |                  |                    |                       |                                    |                   |                        | 399             | 98,76 |

## RAPPORT DE L'ENQUETE SUR LA PREVALENCE DU DIABETE SUCRE A KISANTU EN 2007

| Dates        | Identificatio<br>n | Recuperatio<br>n | Centre de<br>Santé      | Echantillon<br>requis | Nombre de<br>parcelles<br>habitées | Pas de<br>sondage | Echantillon<br>attendu | Sujets<br>recus | %     |
|--------------|--------------------|------------------|-------------------------|-----------------------|------------------------------------|-------------------|------------------------|-----------------|-------|
|              |                    |                  | Nkandu                  | 844                   |                                    |                   |                        |                 |       |
| 16 / 04      | 14                 |                  | Nkandu Gare 3 quartiers | 200                   | 529                                | 1 / 2<br>(2,6)    | 264                    | 136             |       |
| 17 / 04      |                    | Nkandu Gare      |                         |                       |                                    |                   |                        | 49              |       |
|              |                    |                  |                         |                       |                                    |                   |                        | 185             | 92    |
|              | Nkandu             |                  |                         | 644                   | 2758                               | 1 / 4<br>(4,2)    | 700                    |                 |       |
| 18 / 04      | Nkandu             |                  |                         |                       |                                    |                   |                        |                 |       |
| 19 / 04      |                    |                  | Nkandu                  |                       |                                    |                   |                        | 188             |       |
| 20 / 04      |                    |                  | Nkandu                  |                       |                                    |                   |                        | 125             |       |
| 21 / 04      |                    |                  | Nkandu                  |                       |                                    |                   |                        | 151             |       |
| 23 / 04      |                    | Nkandu           |                         |                       |                                    |                   |                        | 135             |       |
|              |                    |                  |                         |                       |                                    |                   |                        | 599             | 92,7  |
| <b>TOTAL</b> |                    |                  |                         |                       |                                    |                   |                        | 1898            | 93,58 |

STROBE Statement—Checklist of items that should be included in reports of *cross-sectional studies*

|                              | Item No | Recommendation                                                                                                                                                                                                                                                                                                                                                        |
|------------------------------|---------|-----------------------------------------------------------------------------------------------------------------------------------------------------------------------------------------------------------------------------------------------------------------------------------------------------------------------------------------------------------------------|
| <b>Title and abstract</b>    | 1       | (a) Indicate the study's design with a commonly used term in the title or the abstract<br>(b) Provide in the abstract an informative and balanced summary of what was done and what was found (a) title (b) abstract                                                                                                                                                  |
| <b>Introduction</b>          |         |                                                                                                                                                                                                                                                                                                                                                                       |
| Background/rationale         | 2       | Explain the scientific background and rationale for the investigation being reported (introduction)                                                                                                                                                                                                                                                                   |
| Objectives                   | 3       | State specific objectives, including any prespecified hypotheses (introduction: last §)                                                                                                                                                                                                                                                                               |
| <b>Methods</b>               |         |                                                                                                                                                                                                                                                                                                                                                                       |
| Study design                 | 4       | Present key elements of study design early in the paper (Methods 1°§)                                                                                                                                                                                                                                                                                                 |
| Setting                      | 5       | Describe the setting, locations, and relevant dates, including periods of recruitment, exposure, follow-up, and data collection (Methods: location, study populations & sampling procedure)                                                                                                                                                                           |
| Participants                 | 6       | (a) Give the eligibility criteria, and the sources and methods of selection of participants (Methods: study population & sampling procedure)                                                                                                                                                                                                                          |
| Variables                    | 7       | Clearly define all outcomes, exposures, predictors, potential confounders, and effect modifiers. Give diagnostic criteria, if applicable (methods: study procedure, diagnostic criteria)                                                                                                                                                                              |
| Data sources/<br>measurement | 8*      | For each variable of interest, give sources of data and details of methods of assessment (measurement). Describe comparability of assessment methods if there is more than one group (Methods: study, prevalence & diagnostic criteria)                                                                                                                               |
| Bias                         | 9       | Describe any efforts to address potential sources of bias (Methods: study procedure and analysis, standardization)                                                                                                                                                                                                                                                    |
| Study size                   | 10      | Explain how the study size was arrived at (formal sample size calculations)                                                                                                                                                                                                                                                                                           |
| Quantitative variables       | 11      | Explain how quantitative variables were handled in the analyses. If applicable, describe which groupings were chosen and why (Methods/analysis)                                                                                                                                                                                                                       |
| Statistical methods          | 12      | (a) Describe all statistical methods, including those used to control for confounding<br>(b) Describe any methods used to examine subgroups and interactions<br>(c) Explain how missing data were addressed<br>(d) If applicable, describe analytical methods taking account of sampling strategy<br>(e) Describe any sensitivity analyses<br>(a-e): methods/analysis |
| <b>Results</b>               |         |                                                                                                                                                                                                                                                                                                                                                                       |
| Participants                 | 13*     | (a) Report numbers of individuals at each stage of study—eg numbers potentially eligible, examined for eligibility, confirmed eligible, included in the study, completing follow-up, and analysed<br>(b) Give reasons for non-participation at each stage<br>(a+b): Results/ study population & characteristics<br>(c) Consider use of a flow diagram (added)         |
| Descriptive data             | 14*     | (a) Give characteristics of study participants (eg demographic, clinical, social) and information on exposures and potential confounders (Results/ characteristics of participants)<br>(b) Indicate number of participants with missing data for each variable of interest (Methods/ characteristics of responders)                                                   |
| Outcome data                 | 15*     | Report numbers of outcome events or summary measures (Results/ prevalence of                                                                                                                                                                                                                                                                                          |

DM & prevalence of D?)

|                          |    |                                                                                                                                                                                                                                  |
|--------------------------|----|----------------------------------------------------------------------------------------------------------------------------------------------------------------------------------------------------------------------------------|
| Main results             | 16 | (a) Give unadjusted estimates and, if applicable, confounder-adjusted estimates and their precision (eg, 95% confidence interval). Make clear which confounders were adjusted for and why they were included (table 1 – results) |
|                          |    | (b) Report category boundaries when continuous variables were categorized N.A.                                                                                                                                                   |
|                          |    | (c) If relevant, consider translating estimates of relative risk into absolute risk for a meaningful time period                                                                                                                 |
| Other analyses           | 17 | Report other analyses done—eg analyses of subgroups and interactions, and sensitivity analyses (results/ ROC analysis)                                                                                                           |
| <b>Discussion</b>        |    |                                                                                                                                                                                                                                  |
| Key results              | 18 | Summarise key results with reference to study objectives (Discussion § 1-3)                                                                                                                                                      |
| Limitations              | 19 | Discuss limitations of the study, taking into account sources of potential bias or imprecision. Discuss both direction and magnitude of any potential bias (Discussion § 5)                                                      |
| Interpretation           | 20 | Give a cautious overall interpretation of results considering objectives, limitations, multiplicity of analyses, results from similar studies, and other relevant evidence (Discussion § 2 & 6)                                  |
| Generalisability         | 21 | Discuss the generalisability (external validity) of the study results (Discussion § 2 & 3)                                                                                                                                       |
| <b>Other information</b> |    |                                                                                                                                                                                                                                  |
| Funding                  | 22 | Give the source of funding and the role of the funders for the present study and, if applicable, for the original study on which the present article is based (Grants reported in the paper on page 3)                           |

\*Give information separately for exposed and unexposed groups.

**Note:** An Explanation and Elaboration article discusses each checklist item and gives methodological background and published examples of transparent reporting. The STROBE checklist is best used in conjunction with this article (freely available on the Web sites of PLoS Medicine at <http://www.plosmedicine.org/>, Annals of Internal Medicine at <http://www.annals.org/>, and Epidemiology at <http://www.epidem.com/>). Information on the STROBE Initiative is available at [www.strobe-statement.org](http://www.strobe-statement.org).



**Diabetes and intermediate hyperglycaemia in Kisantu, DR Congo: a cross-sectional prevalence study**

|                                 |                                                                                                                                                                                                                                                                                                                                                                                                                                                                                                                                                                                                                                                                                                                                                   |
|---------------------------------|---------------------------------------------------------------------------------------------------------------------------------------------------------------------------------------------------------------------------------------------------------------------------------------------------------------------------------------------------------------------------------------------------------------------------------------------------------------------------------------------------------------------------------------------------------------------------------------------------------------------------------------------------------------------------------------------------------------------------------------------------|
| Journal:                        | <i>BMJ Open</i>                                                                                                                                                                                                                                                                                                                                                                                                                                                                                                                                                                                                                                                                                                                                   |
| Manuscript ID:                  | bmjopen-2012-001911.R1                                                                                                                                                                                                                                                                                                                                                                                                                                                                                                                                                                                                                                                                                                                            |
| Article Type:                   | Research                                                                                                                                                                                                                                                                                                                                                                                                                                                                                                                                                                                                                                                                                                                                          |
| Date Submitted by the Author:   | 11-Oct-2012                                                                                                                                                                                                                                                                                                                                                                                                                                                                                                                                                                                                                                                                                                                                       |
| Complete List of Authors:       | Muyer, Muel; Université de Kinshasa, Centre de Santé Publique<br>Muls, Erik; KULeuven, Endocrinology<br>Mapatano, Mala; Université de Kinshasa, Centre de Santé Publique<br>Makulo, Jean-Robert; Université de Kinshasa, Médecine Interne<br>Mvitu, Moise; Université de Kinshasa, Département des Spécialités<br>Kimenyembo, Wivine; Université de Kinshasa, Département des Spécialités<br>Mandja, Bien-Aimé; Université de Kinshasa, Centre de Santé Publique<br>Kimbondo, Pierre; Hôpital St-Luc, Médecine Interne<br>Bieleli, Chris; Université de Kinshasa, Médecine Interne<br>Kaimbo wa Kaimbo, Dieudonné; Université de Kinshasa, Département des Spécialités<br>Buntinx, Frank; Catholic University of Leuven, Dept of General Practice |
| <b>Primary Subject Heading</b>: | Diabetes and endocrinology                                                                                                                                                                                                                                                                                                                                                                                                                                                                                                                                                                                                                                                                                                                        |
| Secondary Subject Heading:      | Global health                                                                                                                                                                                                                                                                                                                                                                                                                                                                                                                                                                                                                                                                                                                                     |
| Keywords:                       | General diabetes < DIABETES & ENDOCRINOLOGY, intermediate hyperglycaemia, prevalence, population based survey, sub-Saharan Africa, DR Congo                                                                                                                                                                                                                                                                                                                                                                                                                                                                                                                                                                                                       |
|                                 |                                                                                                                                                                                                                                                                                                                                                                                                                                                                                                                                                                                                                                                                                                                                                   |

SCHOLARONE™  
Manuscripts

1  
2  
3 **Diabetes and intermediate hyperglycaemia**  
4 **in Kisantu, DR Congo: a cross-sectional prevalence study**  
5

6 M.T. Muyer <sup>1</sup>, E. Muls <sup>2</sup>, M.A. Mapatano <sup>1</sup>, R. Makulo <sup>3</sup>, M. Mvitu <sup>4</sup>, W. Kimenyembo<sup>4</sup>,  
7  
8 M. Mandja <sup>1</sup>, P. Kimbondo <sup>5</sup>, E.O. Bieleli <sup>3</sup>, K.W. Kaïmbo <sup>4</sup>, F. Buntinx <sup>6</sup> \*  
9

10  
11  
12 <sup>1</sup> Ecole de Santé Publique, Université de Kinshasa (UNIKIN), Centre National  
13 d'Epidémiologie du Diabète, Democratic Republic of the Congo (DRC)  
14

15 <sup>2</sup> Department of Endocrinology, KULeuven, Leuven, Belgium  
16

17 <sup>3</sup> Département de Médecine Interne, UNIKIN, Cliniques Universitaires, Kinshasa, DRC  
18

19 <sup>4</sup> Département des Spécialités, UNIKIN, Cliniques Universitaires, Service  
20 d'Ophthalmologie, Kinshasa, DRC  
21

22 <sup>5</sup> Service de Médecine Interne, Hôpital St-Luc, Kisantu, DRC  
23

24 <sup>6</sup> Department of General Practice, Catholic University Leuven, Leuven, Belgium and  
25 Research Institute CAPHRI, Maastricht University, Maastricht, The Netherlands  
26

27  
28  
29  
30 \* Corresponding author: Prof. Frank Buntinx. Dept of General Practice, KULeuven,  
31 Kapucijnenvoer 33, blok j, bus 7001, B-3000 Leuven, Belgium  
32 [frank.buntinx@med.kuleuven.be](mailto:frank.buntinx@med.kuleuven.be);  
33 tel +32-(0)16- 337-493 ; fax +32-(0)16- 337-480  
34  
35  
36  
37  
38

39 **Running title:** Diabetes and intermediate hyperglycaemia prevalence in Kisantu, DR  
40 Congo.  
41

42 **Key words:** prevalence, diabetes, intermediate hyperglycaemia, population based survey,  
43  
44 sub-Saharan Africa, DR Congo.  
45

46  
47 Word count : 2992 (body of text); 247 (abstract)

48 Table : 1

49 Figure : 1  
50  
51  
52  
53  
54  
55  
56  
57  
58  
59  
60

## Abstract

**Objectives** To study prevalence and risk markers of diabetes mellitus and intermediate hyperglycaemia (IH) in Kisantu, a semi-rural town in Bas-Congo province, DR Congo.

**Design, setting and participants** Cross-sectional population-based survey carried out in 2007 in 1898 subjects aged  $\geq 20$  years. A census preceded the survey. A modified WHO STEPwise strategy was used. Capillary glycaemia was measured for fasting plasma glucose (FPG) and 2-h-post-load glucose. Both WHO/IDF 2006 and ADA 2003 diagnostic criteria for diabetes and IH were used.

**Results** Response rate was 93.7%. Complete data were available in 1759 subjects (86.9%). Crude and standardised (for Doll and UN population) prevalence of diabetes were 4.8% and 4.0-4.2%. Crude IH prevalence was 5.8% (WHO/IDF) and 14.2% (ADA). Independent risk markers for diabetes ( $p < 0.01$ ) were: male gender (OR 2.5), age 50-69 years (OR 2.6), family history (OR 3.5), waist (OR 4.1) and alcohol consumption (OR 0.36). In ROC analysis, prediction of diabetes was slightly better by waist than BMI. IH defined according to WHO/IDF was associated with BMI (OR 2.6,  $P < 0.001$ ). IH defined according to ADA was associated ( $p < 0.05$ ) with waist (OR 1.4), education level (OR 1.6), BMI (OR 2.4) and physical activity (OR 0.7).

**Conclusions** Current prevalence of diabetes in DR Congo exceeds IDF projections for 2030. The lower glucose threshold used by ADA almost triples impaired fasting glucose prevalence compared to WHO/IDF criteria. The high proportion of disorders of glycaemia made up by IH suggests the early stages of a diabetes epidemic.



## ARTICLE SUMMARY

**Article focus:** We studied prevalence of diabetes in a semi-rural town in the democratic Republic of Congo. Such information is yet absent.

### Key-messages

- Crude and standardized prevalence of diabetes were 4;8% and 4.0 (Doll,s population) – 4.2 (UN population).
- Crude prevalence of Intermediate hyperglycaemia was 5.8% (WHO/IDF definition) and 14.2% (ADA definition).
- Risk markers for diabetes were male gender, age, family history, waist, and alcohol consumption

### Strengths and limitations

- We had to cope with absence of census data and trained field workers.
- We had to use (low-cost) capillary blood measures instead of venous samples processed in a laboratory and did not formally validate the test ourselves.
- Large group of participants and high participation rate (87%)

### Funding statement

This work was financed by the 2004-2010 ‘Diabetes in DRC’ project of VLIR-UOS (Flemish Interuniversity Council - University Development Cooperation) and supported by the World Diabetes Foundation.

## Abbreviations

ADA, American Diabetes Association; CI, confidence interval; DRC, Democratic Republic of Congo; FPG, fasting plasma glucose; IDF, International Diabetes Federation; IH, intermediate hyperglycaemia; IFG, impaired fasting glucose; IGT, impaired glucose tolerance; NCDs, non-communicable diseases; oGTT, oral glucose tolerance test; SSA, sub-Saharan Africa; UN, United Nations; UNIKIN, Kinshasa University; UOS, University Cooperation Development; VLIR, Vlaamse Interuniversitaire Raad (Flemish Interuniversity Council); WDF, World Diabetes Foundation; WHO, World Health Organization

## INTRODUCTION

Sub-Saharan Africa (SSA) has a disproportionate burden of both infectious and chronic diseases [1]. The epidemic of non-communicable diseases (NCDs) is rising. Diabetes, an important component of NCDs, has been proposed as a tracer of the other burgeoning chronic diseases because it is well defined, fairly easy to diagnose and common [2].

The estimated worldwide prevalence of diabetes among adults was 285 million (6.4%) in 2010, and is predicted to rise to around 438 million (7.7%) by 2030 [3-4]. For SSA the number is expected to rise with 98% from 12 million (3.8%) in 2010 to 24 million (4.7%) in 2030. Increases are expected to be largest in developing countries because of population ageing and urbanisation [5].

Information on epidemiology of diabetes in SSA has increased recently, but is still limited [1-3,5]. High-quality epidemiological studies are difficult to perform in SSA, as they are expensive and labour intensive and populations are often mobile and poorly enumerated [6]. International Diabetes Federation (IDF) estimates for many SSA countries are therefore based on extrapolations from distant and probably dissimilar countries and populations. This is also the case for the Democratic Republic of Congo (DRC), where current IDF estimates are derived from two studies in Tanzania, that were published in 1989 and 2000 and that used now outdated diagnostic criteria [3,7-8]. IDF estimates of national DRC diabetes prevalence of 2.6% in adults, and of 7.4% for impaired glucose tolerance (IGT) should therefore be interpreted with caution.

1  
2  
3 So far, data on diabetes prevalence in SSA according to current diagnostic criteria are  
4 scanty. Few studies have evaluated simultaneously the prevalence of diabetes mellitus  
5 and intermediate hyperglycaemia (IH) [5,9], and no study has compared current ADA  
6 and WHO/IDF criteria for impaired fasting glucose (IFG).  
7  
8  
9

10  
11 The aim of this study is to estimate prevalence rates of diabetes and IH and to determine  
12 their main risk markers in the semi-rural environment of Kisantu, Bas-Congo province,  
13  
14  
15  
16  
17  
18  
19  
20  
21  
22  
23  
24  
25  
26  
27  
28  
29  
30  
31  
32  
33  
34  
35  
36  
37  
38  
39  
40  
41  
42  
43  
44  
45  
46  
47  
48  
49  
50  
51  
52  
53  
54  
55  
56  
57  
58  
59  
60

DRC.

## METHODS

A cross-sectional household survey was conducted in 2007. It was approved by the ethical committee of Kinshasa University (UNIKIN), and informed consent was obtained from all subjects. Design and methods were described in detail previously [10].

### Location

The study was carried out in the four health care areas of Kisantu, a town in Bas-Congo province with approximately 131,000 inhabitants [11]. The principal ethnic group is Bakongo (Bantu), mainly the Bantandu subgroup. Farming is the main economic activity.

### Study population and sampling procedures

All Congolese people aged 20 or more and living in Kisantu were eligible. Pregnant women and people with serious psychiatric disorders were excluded. The sampling process was implemented in two steps: constitution of the sampling frame preceded actual sampling of subjects. The required sample size was calculated to be 2025 participants [10]. Census of inhabited compounds was performed. Sampling in each area was proportionate to its population [11]. Given the sampling frame in each area and the intended sample size, a systematic random sample of households was drawn. Sampling was carried out in four stages. All avenues were included, and a systematic (1/2 or 1/3) random sample of compounds was drawn. In each compound one household was selected randomly. One eligible individual per household was randomly selected. Subjects were asked to come fasting the following morning to the study site. In case of no-show, the interviewer returned the following day. In case of refusal, another individual was selected. The study was preceded by interviewer training, an intensive awareness

1  
2  
3 campaign, and a pilot test in the neighboring city of Madimba, that was not included in  
4  
5 the survey.  
6  
7

### 8 9 10 **Study procedures**

11 Five fixed sites were used for data collection. Subjects went through seven stations  
12 (registration; biochemistry; interview; anthropometry and monofilament; visual acuity  
13 and blood pressure; intraocular pressure and retina; results). Capillary glycaemia was  
14 measured on the first day in subjects having fasted for  $\geq 8$  h with a Glucocard X-Meter  
15 (Menarini Diagnostics), that produces a read out as plasma glucose. On the second day,  
16 2-hour post-load (75 g glucose; oGTT) glycaemia was measured in subjects who had  
17 fasting plasma glucose (FPG) 100-125 mg/dl (5.6-6.9 mmol/l) on day one, and a second  
18 FPG was obtained from subjects with FPG 126-199 mg/dl (7.0-11.1 mmol/l) on the first  
19 day.  
20  
21  
22  
23  
24  
25  
26  
27  
28  
29  
30

31 In agreement with WHO guidance, and addressing the everyday problems in the field, we  
32 used low technology devices for measuring glycaemia. With the Glucocard X device  
33 [12], there is no influence of hematocrite on glucose values within the normoglycemia  
34 range, which is important in screening situations as during our study. Testing showed that  
35 reproducibility is good, the device is robust, easy to use and without need of extensive  
36 training.  
37  
38  
39  
40  
41  
42  
43  
44  
45  
46  
47  
48  
49

### 50 **Diagnostic criteria**

51 ADA 2003 [13] and WHO/IDF 2006 criteria [14] were used to define new cases of  
52 diabetes: FPG  $\geq 7.0$  mmol/l, which was confirmed by repeat testing unless unequivocal  
53 hyperglycaemia (FPG  $\geq 11.1$  mmol/l) was present; or 2-hour plasma glucose  $\geq 11.1$   
54  
55  
56  
57  
58  
59  
60

1  
2  
3 mmol/l during oGTT. Impaired glucose tolerance (IGT) was defined as FPG < 7.0  
4  
5 mmol/l, and 2-hour plasma glucose  $\geq 7.8$  and < 11.1 mmol/l during oGTT. Impaired  
6  
7 fasting glucose (IFG) was defined as FPG 6.1-6.9 mmol/l, and 2-hour plasma glucose <  
8  
9 7.8 mmol/l during oGTT; or as subjects in whom a provisional diagnosis of diabetes  
10  
11 based on an initial FPG 7.0-11.1 mmol/l was not confirmed on repeat testing (second  
12  
13 FPG 6.1-6.9 mmol/l). ADA 2003 diagnostic criteria for IFG (FPG 5.6-6.9 mmol/l) were  
14  
15 used in a secondary analysis. Intermediate hyperglycaemia (IH) refers to subjects with  
16  
17 IGT and/or IFG.  
18  
19

20  
21  
22  
23 Hypertension was defined as average of two blood pressure measurements  $\geq 140/90$  mm  
24  
25 Hg [10], obesity as BMI  $\geq 30$  kg/m<sup>2</sup> and abdominal obesity as waist circumference  $\geq 94$   
26  
27 cm in men and  $\geq 80$  cm in women [15]. Sedentary lifestyle was defined with respect to  
28  
29 occupation [10]. Family history of diabetes mellitus was defined as diabetes in first-  
30  
31 degree relatives. Alcohol consumption was classified as current consumption or not;  
32  
33 marital status as cohabiting or living alone; ethnic origin as Bantandu, other Bakongo or  
34  
35 others.  
36  
37

### 38 39 40 **Analyses**

41  
42 Non-responders and responders were compared, as were subjects with complete data and  
43  
44 those who were invited but absent on the second day. Continuous data were expressed as  
45  
46 averages  $\pm$  SD and categorized data as percentages with 95% CI. Comparisons were  
47  
48 made with student t-test, chi-square and ANOVA. A test was considered significant when  
49  
50  $P < 0.05$ . Crude and age-standardised prevalence for subjects aged  $\geq 20$  years were  
51  
52 calculated using both the standard population of Doll et al. and UN 2008 population  
53  
54 database projections [16-17]. Analyses were stratified by gender. SPSS 16 was used.  
55  
56  
57  
58  
59  
60

1  
2  
3  
4  
5 To study risk markers associated with diabetes and IH, backward stepwise multivariate  
6  
7 logistic regression analyses were used. Family history of diabetes, age by group (<50, 50-  
8  
9 69 ≥ 70 years), gender, marital status, ethnic origin, level of education, physical activity,  
10  
11 alcohol consumption, and either obesity or abdominal obesity, and all interactions with  
12  
13 family history were included in the initial model. ROC analysis compared performance of  
14  
15 BMI and waist size to predict diabetes risk.  
16  
17  
18  
19  
20  
21  
22  
23  
24  
25  
26  
27  
28  
29  
30  
31  
32  
33  
34  
35  
36  
37  
38  
39  
40  
41  
42  
43  
44  
45  
46  
47  
48  
49  
50  
51  
52  
53  
54  
55  
56  
57  
58  
59  
60



## RESULTS

### Study population

The sample consisted of 2025 selected subjects. Response rate was 93.7% (1898/2025). Complete data were available in 1759 subjects (86.9%), as 2 subjects were aged < 20 years, FPG was not available in 30 subjects on day one, and 107 did not repeat tests on day two (Figure 1).

### Characteristics of participants

Average age of 1759 subjects with complete data was  $51.5 \pm 16.4$  years, and 960 (54.6%) were aged > 50 years. Women represented 64.1% (n=1128;  $P < 0.001$ ) of subjects. Mean BMI and waist circumference were  $21.7 \pm 4.6$  kg/m<sup>2</sup> and  $79.1 \pm 12.7$  cm, respectively. Both BMI and waist size were higher in women ( $P < 0.001$  for both; Table 1). Obesity was found in 6.4%, and more prevalent in women (8.6% vs. 2.6%). Among subjects with BMI < 25 kg/m<sup>2</sup>, 2.9% of men and 27.0% of women had abdominal obesity. Hypertension prevalence was 9.8%.

Most participants (n=1078; 61.3%) were of Bantandu ethnicity, and 82.3% had a secondary education level (n=1448). Many participants were farmers or animal breeders (49.1%; n=864), yet only 31.4% (n=553) walked  $\geq$  one hour every day.

Incomplete censuses and the absence of key demographic data in the Kisantu area have precluded comparison of study participant characteristics with those in the general population.

### Characteristics of non-responders and second day absentees

Non-responders (n=107) were younger than responders ( $39.6 \pm 12.0$  vs.  $51.5 \pm 16.4$  years;  $P < 0.001$ ), and were more frequently male ( $53.2$  vs.  $35.9\%$ ;  $P < 0.001$ ). Age, gender, BMI, waist size, systolic and diastolic blood pressure were not significantly different in second day absentees and in participants with complete data. First day FPG was, as expected, significantly higher in second day absentees ( $6.1 \pm 0.5$  vs.  $5.3 \pm 1.9$  mmol/l;  $P < 0.05$ ).

### Prevalence of diabetes mellitus

Crude prevalence of diabetes mellitus was 4.8% (95% CI 3.9-5.9; n=85) (Table 1): men 5.5% (95% CI 3.9-7.6); women 4.4% (95% CI 3.3-5.8). Standardised prevalence was 4.2% and 4.0% according to Doll et al and UN world population prospects, respectively.

People with previously diagnosed diabetes represented 3.4% (n=59) of all subjects, and 69.4% of diabetes cases. Use of oGTT added only a single case of newly diagnosed diabetes. All other newly diagnosed cases were, therefore, detected using FPG. Highest diabetes prevalence was observed in the 50-69 age group (n=49).

### Prevalence of intermediate hyperglycaemia

According to WHO/IDF criteria, crude prevalence of IFG, IGT and IH was 4.7% (n=82), 1.1% (n=20), and 5.8% (95% CI 4.8-7.0; n=102), respectively. IH was observed in 4.6% of men and 6.5% of women (Table 1). IH was frequently observed in younger age groups: n=40 (6.4%) in age group 30-49 vs. n=33 (4.6%) in age group 50-69.

1  
2  
3 According to ADA 2003 criteria, IH prevalence was 14.2% (95% CI 12.6-15.8; n=250):  
4  
5 men 12.0%; women 15.4%. IFG was present in 12.6% (n=221) of subjects, and IGT in  
6  
7 1.6% (n=29).  
8  
9

10  
11 Standardised IH prevalence according to Doll et al. was 5.5% (WHO/IDF criteria) and  
12  
13 13.8% (ADA criteria). According to UN world population prospects, it was 5.7%  
14  
15 (WHO/IDF) (men 3.9%; women 6.6%) and 13.7% (ADA) (men 12.6%; women 15.4%).  
16  
17  
18  
19

### 20 21 **Prevalence of disorders of glycaemia**

22  
23 According to WHO/IDF criteria 10.6% (95% CI 9.2-12.1) of study participants had a  
24  
25 disorder of glycaemia, i.e. diabetes plus IH (men 10.1%; women 10.8%). Based on ADA  
26  
27 criteria disorders of glycaemia were observed in 19.0% of subjects (95% CI 17.2-20.9;  
28  
29 men 17.5%; women 19.8%). The proportion of disorders of glycaemia made up by IH  
30  
31 was 54.7% and 74.7% according to WDF/IDF and ADA criteria, respectively.  
32  
33  
34  
35

### 36 37 **Bivariate analysis of risk markers**

38  
39 Age was not significantly different in subjects with diabetes, IH or normoglycaemia.  
40  
41 Increasing degrees of glucose intolerance were associated with higher BMI values in both  
42  
43 sexes, although average BMI values were within the normal range in all categories.  
44  
45 Higher waist circumferences were observed in both sexes in subjects with diabetes and  
46  
47 IH. Similarly, systolic and diastolic blood pressure was increased in subjects with IH or  
48  
49 diabetes (*Table 1*).  
50  
51  
52  
53

54  
55 Current alcohol use was less prevalent in subjects with diabetes or IH compared to  
56  
57 normoglycaemic people ( $P < 0.05$ ). Family history of diabetes (%) was higher in people  
58  
59  
60

1  
2  
3 with diabetes (36.5%) than in IH (12.7%) and normoglycaemics (8.2%,  $P < 0.001$ ). No  
4  
5 statistical differences were observed between the three groups in terms of marital status,  
6  
7 ethnicity and level of education or occupation.  
8  
9

### 10 11 **Multivariate analyses of risk markers**

12  
13 Independent risk markers for diabetes were: male gender (OR 2.5; 95% CI 1.4-4.2); age  
14  
15 50-69 years (OR 2.6; 95% CI 1.5-4.3); family history of diabetes (OR 3.5; 95% CI 1.8-  
16  
17 6.8); and waist circumference (OR 4.1; 95% CI 2.5-6.8). If family history was negative,  
18  
19 alcohol consumption was protective (OR 0.4; 95% CI 0.2-0.7). If family history was  
20  
21 positive, alcohol consumption was a risk marker (OR=3.8; 95% CI 1.4-10.7).  $P$  for  
22  
23 interaction: 0.01.  
24  
25  
26  
27  
28

29  
30 A similar model that compared IH according to WHO/IDF criteria with normal people  
31  
32 resulted in only one risk marker: obesity (OR 2.6; 95% CI 1.4-4.6). IH defined according  
33  
34 to ADA was associated with waist circumference (OR 1.4; 95% CI 1.1-1.9); and primary  
35  
36 education level (OR 1.6; 95% CI 1.1-2.6). Moderate physical activity was protective.  
37  
38 BMI predicted IH (OR 0.7; 95% CI 0.5-0.9) when it replaced waist circumference in the  
39  
40 model.  
41  
42  
43  
44

### 45 **ROC analysis**

46  
47 In ROC analysis waist circumference (AUC 0.68; 95% CI 0.62-0.74) predicted diabetes  
48  
49 slightly better than BMI (AUC 0.61; 95% CI 0.54-0.68). Difference in AUC was 0.08;  
50  
51 95% CI 0.03-0.11.  
52  
53  
54  
55  
56  
57  
58  
59  
60

## DISCUSSION

This analytical cross-sectional survey with a participation rate of 87% proves that prevalence studies on NCDs are feasible, even in a Central African country which is one of the poorest countries in the world.

Crude prevalence of diabetes in adults in this study (4.8%) is higher than 2009 IDF estimates for DRC (2.6% for crude national prevalence; 3.2% prevalence adjusted to world population), and already exceeds 2030 IDF projections (3.2-4.4%) [3-4]. The present data from DRC are however largely in line with recent results from other countries in the region [3, 9, 18] and from the Kivu region [19]. Standardised prevalence in our study is slightly lower than crude prevalence (4.0-4.2% vs. 4.8%). Other countries in SSA show similar results [3].

The crude prevalence of the present survey may have been influenced by the structure of the study sample that contained relatively few individuals aged < 50 years in whom diabetes tends to be less prevalent. In the present study, people aged < 20 years have been excluded, meaning that our population structure was truncated. The under-representation of young adult men in our study is not unique in SSA: women represented 52, 58, 62, and even 79% of study participants in previous studies [20-22]. This may, in part, be due to young men migrating to larger cities or mining areas for economic reasons. As agricultural activities are the main occupation of the Kisantu population, some men may also have preferred to go out to work in the fields. As young men tend to be less obese, this under-representation may influence the crude – but not the standardised- prevalence rate of diabetes and IH.

Contrary to most other studies in SSA, newly detected diabetes was low (31%) in our study. Except in urban South Africa and in one study in rural Sudan, fewer than 50% of

1  
2  
3 participants in previous surveys knew they had diabetes [5]. This may reflect effects of  
4  
5 repeated diabetes awareness campaigns and level of diabetes care in Kisantu.  
6  
7

8  
9  
10 Crude prevalence of IH in the present survey (5.8% and 14.2% according to WHO/IDF or  
11  
12 ADA criteria, respectively) reflects mainly the proportion of subjects with IFG. The  
13  
14 lower glucose threshold used by ADA almost triples IFG prevalence compared to  
15  
16 WHO/IDF criteria, as was previously observed in surveys in Denmark, India and the  
17  
18 USA [14]. As a consequence, disorders of glycaemia, i.e. diabetes plus IH, according to  
19  
20 ADA criteria are observed in 19.0% of the semi-rural adult population of Kisantu.  
21  
22 Together with the high proportion of disorders of glycaemia made up by IH (54.7% and  
23  
24 74.7% according to WHO/IDF and ADA, respectively), these data suggest the early  
25  
26 stages of a diabetes epidemic in DRC, probably more in urban than in rural communities  
27  
28 [19]. It is noteworthy that these observations are made in people with normal average  
29  
30 BMI values, according to Caucasian criteria, a finding that also has been reported  
31  
32 elsewhere in SSA [19].  
33  
34  
35  
36  
37

38  
39 A cross-sectional study cannot prove a cause and effect relationship between risk markers  
40  
41 and disease, only an association. However, combining statistical association and clinical  
42  
43 reasoning may provide an indication of such an effect, even in the absence of a  
44  
45 longitudinal study. Here, we use the term risk marker for a variable with both a  
46  
47 significant independent association with diabetes and a clinical suggestion about the  
48  
49 direction of this association. Independent risk markers for diabetes observed in this  
50  
51 survey are similar to those identified elsewhere in SSA: male gender, age 50-59 years,  
52  
53 family history, and waist circumference. BMI and waist circumference were risk markers  
54  
55 for IH, while moderate physical activity level was a protective factor. The latter  
56  
57  
58  
59  
60

1  
2  
3 observation supports the conclusions of a recent study in Cameroon [23]: modest  
4 population-based changes in physical activity may have significant benefits in terms of  
5  
6 reducing the emerging burden of metabolic diseases.  
7

8  
9 We identified a percentage of known diabetes which is higher than found elsewhere [24].  
10  
11 This may result from a well organised diabetes program including awareness campaigns  
12  
13 in the past. Of course this does not influence the prevalence rates we report.  
14  
15

16  
17  
18  
19 Main challenges for this study were the absence of reliable census data and trained field  
20  
21 workers, the difficulty of motivating the population, and performing biochemical tests  
22  
23 using low-cost, robust and simple technology. As in similar situations elsewhere, we had  
24  
25 to rely on cluster sampling [25-26]. Basic principles of the WHO STEPwise method were  
26  
27 followed [25], but we added repeat FPG testing or 2-hour post-load glucose in pre-  
28  
29 specified subgroups. This is consistent with WHO/IDF and ADA recommendations to  
30  
31 enhance chances of detecting diabetes cases and differentiate between IFG and IGT [13-  
32  
33 14, 27]. As 2-h post-load glucose was carried out in only a subset of participants,  
34  
35 prevalence of diabetes and IGT may have been underestimated. However, most  
36  
37 characteristics are perfectly comparable between attenders and non-attenders, but non-  
38  
39 attenders tended to be younger - and therefore related to even less diabetes risk compared  
40  
41 to attenders – and mostly males, unable to attend because they were working in the fields  
42  
43 or far from their home town – and therefore unlikely to have an undetected diabetes. If  
44  
45 none of the non-attenders would have diabetes, the prevalence would decrease from 4.8%  
46  
47 to 4.6%, what in our view has little relevance. We therefore have no reason to expect any  
48  
49 important difference between diabetes prevalence in second day attenders and non-  
50  
51 attenders.  
52  
53  
54  
55  
56  
57  
58  
59  
60

1  
2  
3 Capillary blood glucose was measured because it is easier and less expensive than venous  
4 tests. Also, WHO and IDF recognise in under-resourced countries the difficulty of  
5 carrying out biochemical tests, unless low-cost technology is used [14, 25, 28].  
6  
7

8  
9 We did not perform a validation study of these tests ourselves. However, according to a  
10 recent WHO/IDF report [14], fasting values of both methods are identical. Only  
11 postprandial values may differ (recommendation 5). With this device, there is no  
12 influence of hematocrite on glucose values within the normoglycaemia range, which is  
13 important in screening situations as during our study. [29]. The Glucocard X reports  
14 plasma glucose values. Testing showed that reproducibility is good, the device is robust,  
15 easy to use and without need of extensive training [12]. Additionally, according to the  
16 above mentioned WHO/IDF report, separation of plasma within minutes after sampling is  
17 required to obtain correct values when sampling venous blood. Even sampling in a  
18 container with NaF is not sufficient. Systematic separation would be totally impossible in  
19 rural RDC.  
20  
21  
22  
23  
24  
25  
26  
27  
28  
29  
30  
31  
32

33  
34 We have little information about the characteristics of the non-responders. Another  
35 weakness is that we were unable to compare our study sample with the general  
36 population due to the lack of an official population census map.  
37  
38  
39  
40  
41  
42

43 Strengths of our study are the large number of study participants and the high  
44 participation rate. This was obtained through visiting non-responders at home after each  
45 day of the survey [10], a high level of awareness and strong involvement of community  
46 members (health zone, local leaders, churches).  
47  
48  
49  
50

51 The high prevalence of diabetes mellitus in this rural town, and the even higher  
52 prevalence of IDF suggest a large burden of the disease in the region and let us expect  
53  
54  
55  
56  
57  
58  
59  
60



1  
2  
3  
4  
5  
6  
7  
8  
9  
10  
11  
12  
13  
14  
15  
16  
17  
18  
19  
20  
21  
22  
23  
24  
25  
26  
27  
28  
29  
30  
31  
32  
33  
34  
35  
36  
37  
38  
39  
40  
41  
42  
43  
44  
45  
46  
47  
48  
49  
50  
51  
52  
53  
54  
55  
56  
57  
58  
59  
60

even larger numbers in the future. This indicates a real challenge for the Congolese National diabetes plan.

For peer review only

## Acknowledgements

The authors thank Okitolonda Wemakoy, Kiloka Nyandwe and Prince Kimpanga of Kinshasa University, School of Public Health, DRC; Mangani Nseka of Kinshasa University, Teaching Hospital; Marina Devis and Carla Truyers of the Department of General Practice, Catholic University Leuven; and Geert Molenberghs of the Department of Biostatistics.

We also acknowledge the field workers Baka Mampuya, Bungudi Edo, Gitambala Jérémie, Kapambu Laetitia, Kimbeni Fifi, Kuzungulu Bibiche, Luntadila Anita, Mafuta Mamie, Makengo Ange, Makiese Brigitte, Mamingila Richard, Matenda Anita, Mbombo Alpha, Mfutila Espérance, Ndengila Pitchouna, Ngiambila Zimbote, Nseka Baron, Nsiala Floribert, Nsoma Malou, and Sanga Pélagie.

**Declaration of Competing Interests:** Nothing to declare

## References

1. Dalal S, Beunza JJ, Volmink J, Adebamowo C, Bajunirwe F, Njelekela M et al. Non-communicable diseases in sub-Saharan Africa: what we know now. *Int J Epidemiol* 2011; 1-17 doi:10.1093/ije/dyr050.
2. Levitt NS. Diabetes in Africa: epidemiology, management and healthcare challenges. *Heart* 2008; **94**: 1376-1382.
3. IDF. Diabetes Atlas 4<sup>th</sup> edn. Brussels, Belgium: International Diabetes Federation 2009.
4. Shaw JE, Sicree RA, Zimmet PZ. Global estimates of the prevalence of diabetes for 2010 and 2030. *Diabetes Res Clin Pract* 2010; **87**: 4-14.
5. Mbanya JC, Motala AA, Sobngwi E, Assah FK, Enoru ST. Diabetes in sub-Saharan Africa. *Lancet* 2010; **375**: 2254-2266.
6. Gill GV, Mbanya JC, Ramaiya KL, Tesfaye S. A sub-Saharan African perspective of diabetes. *Diabetologia* 2009; **52**: 8-16.
7. McLarty DG, Swai AB, Kitange HM, Masuki G, Mtinangi BL, Kilima PM et al. Prevalence of diabetes and impaired glucose tolerance in rural Tanzania. *Lancet* 1989; **1**: 871-875.
8. Aspray TJ, Mugusi F, Rashid S, Whiting D, Edwards R, Alberti KG et al. Rural and urban differences in diabetes prevalence in Tanzania: the role of obesity, physical inactivity and urban living. *Trans R Soc Trop Med Hyg* 2000; **94**: 637-644.
9. Muyer MT, Muls E, Mapatano MA, Bieleli EO, Okitolonda W. Le diabète sucré en Afrique sub-Saharienne, une revue systématique de la littérature [Diabetes mellitus in sub-Saharan Africa, a systematic review of the literature]. *Louvain Médical* 2008; **127**: 153-165.

- 1  
2  
3 10. Muyer MT, Muls E, Mapatano MA, Makulo R, Mvitu M, Kimenyembo W et al.  
4  
5 Estimating prevalence of diabetes in a Congolese town was feasible. *J Clin Epidemiol*  
6  
7 2011; **64**: 172-181.  
8
- 9  
10 11. Kimfuta J. Rapport annuel du Bureau Central de la Zone de Santé de Kisantu [Annual  
11  
12 report of the central office of the health zone of Kisantu] 2005.  
13
- 14 12. American Diabetes Association. Follow-up report on the diagnosis of diabetes  
15  
16 mellitus. *Diabetes Care* 2003; **26**: 3160-3167.  
17
- 18 13. SKUP. Glucocard X-meter, Glucocard X-sensor: report from an evaluation organised  
19  
20 by SKUP. Scandinavian evaluation of laboratory equipment for primary health care.  
21  
22 University of Bergen, Bergen: 2006.  
23
- 24 14. World Health Organization. Definition and diagnosis of diabetes mellitus and  
25  
26 intermediate hyperglycemia. Report of a WHO/IDF consultation. Geneva: WHO  
27  
28 2006.  
29
- 30 15. Alberti KG, Zimmet P, Shaw J. Metabolic syndrome – a new worldwide definition. A  
31  
32 consensus statement from the International Diabetes Federation. *Diabet Med* 2006;  
33  
34 **23**: 469-480.  
35  
36
- 37 16. Doll R, Waterhouse J, Muir C, Parkin D, Whelan S, Ferlay I et al. Cancer incidence  
38  
39 in five continents: a technical report. Geneva, Lyon: International Union against  
40  
41 Cancer, International Agency for Research on Cancer 1966.  
42  
43
- 44 17. United Nations. Dept of Economic and Social Affairs. Population Division. World  
45  
46 Population Prospects. The 2008 Revision Population Database. Geneva: United  
47  
48 Nations 2008.  
49
- 50 18. Hwnag CK, Han PV, Zabetian A, Ali MK, Narayan KMV. Rural diabetes prevalence  
51  
52 quintuples over twenty-five years in low- and middle-income countries: a systematic  
53  
54 review and meta-analysis. *Diab Res Clin Pract* 2012; **96**: 271-285.  
55  
56  
57  
58  
59  
60

- 1  
2  
3 19. Katchunga P, Masumbuko B, Belma M, KashongweMunogolo Z, Hermans MP,  
4  
5 M'buyamba-Kabungu JR. Age and living in an urban environment are major  
6  
7 determinants of diabetes among South Kivu Congolese adults. *Diabetes Metab* 2012;  
8  
9 38(4): 324-31.  
10
- 11 20. Omar M, Seedat M, Motala A, Dyer R, Becker P. The prevalence of diabetes mellitus  
12  
13 and impaired glucose tolerance in a group of urban South African blacks. *S Afr Med J*  
14  
15 1993; **83**: 641-643.  
16  
17
- 18 21. Levitt NS, Katzenellenbogen JM, Bradshaw D, Hoffman MN, Bonnici F. The  
19  
20 prevalence and identification of risk factors for NIDDM in urban Africans in Cape  
21  
22 Town, South Africa. *Diabetes Care* 1993; **16**: 601-607.  
23  
24
- 25 22. Motala A, Esterhuizen T, Gouws E, Pirie F, Omar M. Diabetes and other disorders of  
26  
27 glycemia in a rural South African community: prevalence and associated risk factors.  
28  
29 *Diabetes Care* 2008; **31**: 1783-1788.  
30  
31
- 32 23. Assah FK, Ekelund U, Brage S, JC Mbanya, Wareham NJ. Urbanization, physical  
33  
34 activity, and metabolic health in sub-Saharan Africa. *Diabetes Care* 2011; **34**: 491-  
35  
36 496.  
37
- 38 24. Peer N, Steyn K, Lombard C, Lambert EV, Vythillingum B, Levitt NS. Rising  
39  
40 diabetes prevalence among urban-dwelling black South-Africans. *PLoSOne* 7(9):  
41  
42 e43336.  
43  
44
- 45 25. Bonita R, deCourten M, Dwyer T, Jamrosik K, Winkelmann R. Summary.  
46  
47 Monitoring of risk factors for non-communicable diseases: the WHO STEPwise  
48  
49 approach. Geneva, Switzerland: World Health Organization 2001.  
50  
51
- 52 26. Herold J. Surveys and sampling. In: Gregg M. ed, *Field epidemiology*. Oxford, UK:  
53  
54 Oxford University Press 2008..  
55  
56  
57  
58  
59  
60

1  
2  
3 27. American Diabetes Association. Position statement. Diagnosis and classification of  
4  
5 diabetes mellitus. *Diabetes Care* 2011; **34** (Suppl 1): S62-69.

6  
7 28. IDF, *Diabetes Atlas* 3th edn. Brussels, Belgium: International Diabetes federation  
8  
9 2006.

10  
11 Arens S, Moons V, Meuleman P, Struyf F, Zaman Z. Evaluation of Glucocard  
12 Memory 2 and Acctrend sensor blood glucose meters. *Clin Chem Lab Med* 1998;  
13 36(1): 47-52.  
14  
15  
16  
17  
18  
19  
20  
21  
22  
23  
24  
25  
26  
27  
28  
29  
30  
31  
32  
33  
34  
35  
36  
37  
38  
39  
40  
41  
42  
43  
44  
45  
46  
47  
48  
49  
50  
51  
52  
53  
54  
55  
56  
57  
58  
59  
60

Table 1 Clinical characteristics and crude prevalence of diabetes, intermediate hyperglycaemia or normoglycaemia according to WHO/IDF 2006 criteria [13] or ADA 2003 criteria [12] of 1759 adults in Kisantu, DR Congo.

|                               | WHO / IDF    |              |                             |              |          | ADA          |                             |              |          |
|-------------------------------|--------------|--------------|-----------------------------|--------------|----------|--------------|-----------------------------|--------------|----------|
|                               | All          | Diabetes     | Intermediate Hyperglycaemia | Normal       | P-value* | Diabetes     | Intermediate Hyperglycaemia | Normal       | P-value* |
| <b>n</b>                      | 1759         | 85           | 102                         | 1572         |          | 85           | 250                         | 1424         |          |
| <b>Prevalence</b>             |              | 4.8 %        | 5.8 %                       | 89.4 %       |          | 4.8 %        | 14.2 %                      | 81.0 %       |          |
| <b>95% CI</b>                 |              | 3.8-5.9      | 4.8-7.0                     | 87.9-90.8    |          | 3.8-5.9      | 12.6-15.8                   | 79.1-82.8    |          |
| <b>Men (n=631)</b>            |              | 5.5 %        | 4.6 %                       | 89.9 %       |          | 5.5 %        | 12.0 %                      | 82.4 %       |          |
| <b>Women (n=1128)</b>         |              | 4.4 %        | 6.5 %                       | 89.1 %       |          | 4.4 %        | 15.4 %                      | 80.2 %       |          |
| <b>Age (years)</b>            |              |              |                             |              |          |              |                             |              |          |
| <b>Men</b>                    | 53.0 ± 17.0  | 56.6 ± 15.2  | 56.0 ± 15.9                 | 52.6 ± 17.2  | 0.26     | 56.6 ± 15.2  | 52.5 ± 15.7                 | 52.9 ± 17.3  | 0.40     |
| <b>Women</b>                  | 50.7 ± 16.0  | 55.2 ± 15.2  | 50.0 ± 16.3                 | 50.5 ± 16.0  | 0.13     | 55.2 ± 15.2  | 50.9 ± 14.9                 | 50.4 ± 16.2  | 0.12     |
| <b>BMI (kg/m<sup>2</sup>)</b> |              |              |                             |              |          |              |                             |              |          |
| <b>Men</b>                    | 20.6 ± 3.5   | 21.7 ± 4.7   | 21.5 ± 4.4                  | 20.5 ± 3.4   | 0.06     | 21.7 ± 4.6   | 21.6 ± 4.2                  | 20.4 ± 3.3   | 0.03     |
| <b>Women</b>                  | 22.3 ± 4.9   | 24.8 ± 5.7   | 23.1 ± 5.6                  | 22.1 ± 4.8   | 0.001    | 24.7 ± 5.7   | 22.8 ± 5.3                  | 22.1 ± 4.8   | 0.001    |
| <b>Waist (cm)</b>             |              |              |                             |              |          |              |                             |              |          |
| <b>Men</b>                    | 77.5 ± 11.0  | 84.4 ± 14.2  | 80.5 ± 13.5                 | 76.9 ± 10.5  | 0.001    | 84.4 ± 14.3  | 80.7 ± 13.3                 | 76.5 ± 0.1   | 0.001    |
| <b>Women</b>                  | 80.1 ± 13.5  | 88.5 ± 13.7  | 81.4 ± 13.2                 | 79.5 ± 13.3  | 0.001    | 88.5 ± 13.8  | 80.5 ± 13.0                 | 79.5 ± 13.4  | 0.0001   |
| <b>Blood pressure (mmHg)</b>  |              |              |                             |              |          |              |                             |              |          |
| <b>Systolic</b>               |              |              |                             |              |          |              |                             |              |          |
| <b>Men</b>                    | 124.4 ± 24.1 | 131.9 ± 25.0 | 130.5 ± 19.0                | 123.6 ± 21.3 | 0.03     | 131.9 ± 24.6 | 125.2 ± 18.9                | 123.8 ± 21.6 | 0.09     |
| <b>Women</b>                  | 119.2 ± 22.3 | 133.1 ± 28.4 | 126.2 ± 21.2                | 120.1 ± 21.0 | 0.001    | 133.9 ± 30.9 | 124.4 ± 22.9                | 117.4 ± 21.2 | 0.001    |
| <b>Diastolic</b>              |              |              |                             |              |          |              |                             |              |          |
| <b>Men</b>                    | 76.9 ± 12.4  | 81.2 ± 12.7  | 80.7 ± 12.3                 | 76.4 ± 12.3  | 0.02     | 81.2 ± 12.7  | 77.1 ± 13.0                 | 76.5 ± 12.3  | 0.09     |
| <b>Women</b>                  | 73.9 ± 12.4  | 80.7 ± 13.3  | 77.9 ± 12.6                 | 74.5 ± 12.3  | 0.001    | 80.4 ± 13.8  | 75.9 ± 12.1                 | 73.2 ± 12.2  | 0.001    |
| <b>Glycaemia (mmol/l)</b>     |              |              |                             |              |          |              |                             |              |          |
| <b>Men</b>                    | 5.4 ± 2.5    | 12.6 ± 7.2   | 6.4 ± 0.6                   | 4.9 ± 0.5    | 0.001    | 12.6 ± 7.2   | 6.0 ± 0.5                   | 4.8 ± 0.5    | 0.001    |
| <b>Women</b>                  | 5.2 ± 1.5    | 9.9 ± 4.6    | 6.5 ± 0.4                   | 5.0 ± 0.5    | 0.001    | 9.9 ± 4.6    | 6.1 ± 0.5                   | 4.8 ± 0.5    | 0.001    |

\*: p –values relate to the degree of significance when comparing the means between diabetes, IH and normal and are based on ANOVA analysis

Flowchart: Participants in the Kisantu Diabetes Prevalence study

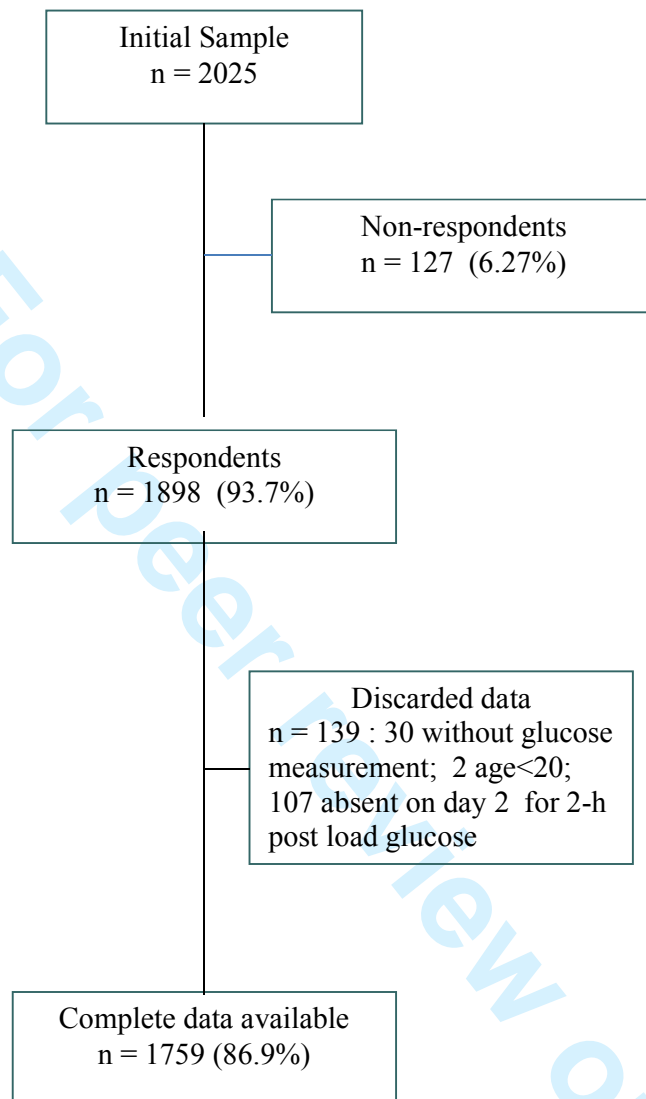



**Prevalence of diabetes and intermediate hyperglycaemia  
in Kisantu, DR Congo: a cross-sectional prevalence study**

M.T. Muyer<sup>1</sup>, E. Muls<sup>2</sup>, M.A. Mapatano<sup>1</sup>, R. Makulo<sup>3</sup>, M. Mvitu<sup>4</sup>, W. Kimenyembo<sup>4</sup>,  
M. Mandja<sup>1</sup>, P. Kimbondo<sup>5</sup>, E.O. Bieleli<sup>3</sup>, K.W. Kaïmbo<sup>4</sup>, F. Buntinx<sup>6\*</sup>

<sup>1</sup> Ecole de Santé Publique, Université de Kinshasa (UNIKIN), Centre National d'Epidémiologie du Diabète, Democratic Republic of the Congo (DRC)

<sup>2</sup> Department of Endocrinology, KULeuven, Leuven, Belgium

<sup>3</sup> Département de Médecine Interne, UNIKIN, Cliniques Universitaires, Kinshasa, DRC

<sup>4</sup> Département des Spécialités, UNIKIN, Cliniques Universitaires, Service d'Ophthalmologie, Kinshasa, DRC

<sup>5</sup> Service de Médecine Interne, Hôpital St-Luc, Kisantu, DRC

<sup>6</sup> Department of General Practice, Catholic University Leuven, Leuven, Belgium and Research Institute CAPHRI, Maastricht University, Maastricht, The Netherlands

\* Corresponding author: Prof. Frank Buntinx. Dept of General Practice, KULeuven, Kapucijnenvoer 33, blok j, bus 7001, B-3000 Leuven, Belgium  
[frank.buntinx@med.kuleuven.be](mailto:frank.buntinx@med.kuleuven.be);  
tel +32-(0)16- 337-493 ; fax +32-(0)16- 337-480

**Running title:** Diabetes and intermediate hyperglycaemia prevalence in Kisantu, DR Congo.

**Key words:** prevalence, diabetes, intermediate hyperglycaemia, population based survey, sub-Saharan Africa, DR Congo.

Word count : 2992 (body of text); 247 (abstract)  
Table : 1  
Figure : 1

Formatted: English (U.S.)

Formatted: Font: (Default) Arial, English (U.S.)

Formatted: English (U.S.)

Field Code Changed

## Abstract

**Objectives** To study prevalence and risk markers of diabetes mellitus and intermediate hyperglycaemia (IH) in Kisantu, a semi-rural town in Bas-Congo province, DR Congo.

**Design, setting and participants** Cross-sectional population-based survey carried out in 2007 in 1898 subjects aged  $\geq 20$  years. A census preceded the survey. A modified WHO STEPwise strategy was used. Capillary glycaemia was measured for fasting plasma glucose (FPG) and 2-h-post-load glucose. Both WHO/IDF 2006 and ADA 2003 diagnostic criteria for diabetes and IH were used.

**Results** Response rate was 93.7%. Complete data were available in 1759 subjects (86.9%). Crude and standardised (for Doll and UN population) prevalence of diabetes were 4.8% and 4.0-4.2%. Crude IH prevalence was 5.8% (WHO/IDF) and 14.2% (ADA). Independent risk markers for diabetes ( $p < 0.01$ ) were: male gender (OR 2.5), age 50-69 years (OR 2.6), family history (OR 3.5), waist (OR 4.1) and alcohol consumption (OR 0.36). In ROC analysis, prediction of diabetes was slightly better by waist than BMI. IH defined according to WHO/IDF was associated with BMI (OR 2.6,  $P < 0.001$ ). IH defined according to ADA was associated ( $p < 0.05$ ) with waist (OR 1.4), education level (OR 1.6), BMI (OR 2.4) and physical activity (OR 0.7).

**Conclusions** Current prevalence of diabetes in DR Congo exceeds IDF projections for 2030. The lower glucose threshold used by ADA almost triples impaired fasting glucose prevalence compared to WHO/IDF criteria. The high proportion of disorders of glycaemia made up by IH suggests the early stages of a diabetes epidemic.

## ARTICLE SUMMARY

**Article focus:** We studied prevalence of diabetes in a semi-rural town in the democratic Republic of Congo. Such information is yet absent.

### Key-messages

- Crude and standardized prevalence of diabetes were 4.8% and 4.0 (Doll,s population) – 4.2 (UN population).
- Crude prevalence of Intermediate hyperglycaemia was 5.8% (WHO/IDF definition) and 14.2% (ADA definition).
- Risk markers for diabetes were male gender, age, family history, waist, and alcohol consumption

### Strengths and limitations

- We had to cope with absence of census data and trained field workers.
- We had to use (low-cost) capillary blood measures instead of venous samples processed in a laboratory and did not formally validate the test ourselves.
- Large group of participants and high participation rate (87%)

### Funding statement

This work was financed by the 2004-2010 ‘Diabetes in DRC’ project of VLIR-UOS (Flemish Interuniversity Council - University Development Cooperation) and supported by the World Diabetes Foundation.

### Abbreviations

ADA, American Diabetes Association; CI, confidence interval; DRC, Democratic Republic of Congo; FPG, fasting plasma glucose; IDF, International Diabetes Federation; IH, intermediate hyperglycaemia; IFG, impaired fasting glucose; IGT, impaired glucose tolerance; NCDs, non-communicable diseases; oGTT, oral glucose tolerance test; SSA, sub-Saharan Africa; UN, United Nations; UNIKIN, Kinshasa University; UOS, University Cooperation Development; VLIR, Vlaamse Interuniversitaire Raad (Flemish Interuniversity Council); WDF, World Diabetes Foundation; WHO, World Health Organization

## INTRODUCTION

Sub-Saharan Africa (SSA) has a disproportionate burden of both infectious and chronic diseases [1]. The epidemic of non-communicable diseases (NCDs) is rising. Diabetes, an important component of NCDs, has been proposed as a tracer of the other burgeoning chronic diseases because it is well defined, fairly easy to diagnose and common [2].

The estimated worldwide prevalence of diabetes among adults was 285 million (6.4%) in 2010, and is predicted to rise to around 438 million (7.7%) by 2030 [3-4]. For SSA the number is expected to rise with 98% from 12 million (3.8%) in 2010 to 24 million (4.7%) in 2030. Increases are expected to be largest in developing countries because of population ageing and urbanisation [5].

Information on epidemiology of diabetes in SSA has increased recently, but is still limited [1-3,5]. High-quality epidemiological studies are difficult to perform in SSA, as they are expensive and labour intensive and populations are often mobile and poorly enumerated [6]. International Diabetes Federation (IDF) estimates for many SSA countries are therefore based on extrapolations from distant and probably dissimilar countries and populations. This is also the case for the Democratic Republic of Congo (DRC), where current IDF estimates are derived from two studies in Tanzania, that were published in 1989 and 2000 and that used now outdated diagnostic criteria [3,7-8]. IDF estimates of national DRC diabetes prevalence of 2.6% in adults, and of 7.4% for impaired glucose tolerance (IGT) should therefore be interpreted with caution.

1  
2  
3  
4  
5  
6  
7  
8  
9  
10  
11  
12  
13  
14  
15  
16  
17  
18  
19  
20  
21  
22  
23  
24  
25  
26  
27  
28  
29  
30  
31  
32  
33  
34  
35  
36  
37  
38  
39  
40  
41  
42  
43  
44  
45  
46  
47  
48  
49  
50  
51  
52  
53  
54  
55  
56  
57  
58  
59  
60

So far, data on diabetes prevalence in SSA according to current diagnostic criteria are scanty. Few studies have evaluated simultaneously the prevalence of diabetes mellitus and intermediate hyperglycaemia (IH) [5,9], and no study has compared current ADA and WHO/IDF criteria for impaired fasting glucose (IFG).

The aim of this study is to estimate prevalence rates of diabetes and IH and to determine their main risk markers in the semi-rural environment of Kisantu, Bas-Congo province, DRC.

## METHODS

A cross-sectional household survey was conducted in 2007. It was approved by the ethical committee of Kinshasa University (UNIKIN), and informed consent was obtained from all subjects. Design and methods were described in detail previously [10].

### Location

The study was carried out in the four health care areas of Kisantu, a town in Bas-Congo province with approximately 131,000 inhabitants [11]. The principal ethnic group is Bakongo (Bantu), mainly the Bantandu subgroup. Farming is the main economic activity.

### Study population and sampling procedures

All Congolese people aged 20 or more and living in Kisantu were eligible. Pregnant women and people with serious psychiatric disorders were excluded. The sampling process was implemented in two steps: constitution of the sampling frame preceded actual sampling of subjects. The required sample size was calculated to be 2025 participants [10]. Census of inhabited compounds was performed. Sampling in each area was proportionate to its population [11]. Given the sampling frame in each area and the intended sample size, a systematic random sample of households was drawn. Sampling was carried out in four stages. All avenues were included, and a systematic (1/2 or 1/3) random sample of compounds was drawn. In each compound one household was selected randomly. One eligible individual per household was randomly selected. Subjects were asked to come fasting the following morning to the study site. In case of no-show, the interviewer returned the following day. In case of refusal, another individual was selected. The study was preceded by interviewer training, an intensive awareness

1  
2  
3  
4  
5  
6  
7 campaign, and a pilot test in the neighboring city of Madimba, that was not included in  
8  
9 the survey.

### 10 11 12 **Study procedures**

13  
14 Five fixed sites were used for data collection. Subjects went through seven stations  
15  
16 (registration; biochemistry; interview; anthropometry and monofilament; visual acuity  
17  
18 and blood pressure; intraocular pressure and retina; results). Capillary glycaemia was  
19  
20 measured on the first day in subjects having fasted for  $\geq 8$  h with a Glucocard X-Meter  
21  
22 (Menarini Diagnostics), that produces a read out as plasma glucose. On the second day,  
23  
24 2-hour post-load (75 g glucose; oGTT) glycaemia was measured in subjects who had  
25  
26 fasting plasma glucose (FPG) 100-125 mg/dl (5.6-6.9 mmol/l) on day one, and a second  
27  
28 FPG was obtained from subjects with FPG 126-199 mg/dl (7.0-11.1 mmol/l) on the first  
29  
30 day.

31  
32 In agreement with WHO guidance, [and addressing the everyday problems in the field](#), we  
33  
34 used low technology devices for measuring glycaemia. With the Glucocard X device  
35  
36 [\[12\]](#), there is no influence of hematocrite on glucose values within the normoglycemia  
37  
38 range, which is important in screening situations as during our study. Testing showed that  
39  
40 reproducibility is good, the device is robust, easy to use and without need of extensive  
41  
42 training.

### 43 44 45 46 47 **Diagnostic criteria**

48  
49 ADA 2003 [\[13\]](#) and WHO/IDF 2006 criteria [\[14\]](#) were used to define new cases of  
50  
51 diabetes: FPG  $\geq 7.0$  mmol/l, which was confirmed by repeat testing unless unequivocal  
52  
53 hyperglycaemia (FPG  $\geq 11.1$  mmol/l) was present; or 2-hour plasma glucose  $\geq 11.1$   
54



1  
2  
3  
4  
5  
6 mmol/l during oGTT. Impaired glucose tolerance (IGT) was defined as FPG < 7.0  
7  
8 mmol/l, and 2-hour plasma glucose  $\geq$  7.8 and < 11.1 mmol/l during oGTT. Impaired  
9  
10 fasting glucose (IFG) was defined as FPG 6.1-6.9 mmol/l, and 2-hour plasma glucose <  
11  
12 7.8 mmol/l during oGTT; or as subjects in whom a provisional diagnosis of diabetes  
13  
14 based on an initial FPG 7.0-11.1 mmol/l was not confirmed on repeat testing (second  
15  
16 FPG 6.1-6.9 mmol/l). ADA 2003 diagnostic criteria for IFG (FPG 5.6-6.9 mmol/l) were  
17  
18 used in a secondary analysis. Intermediate hyperglycaemia (IH) refers to subjects with  
19  
20 IGT and/or IFG.  
21

22  
23  
24 Hypertension was defined as average of two blood pressure measurements  $\geq$  140/90 mm  
25  
26 Hg [10], obesity as BMI  $\geq$  30 kg/m<sup>2</sup> and abdominal obesity as waist circumference  $\geq$  94  
27  
28 cm in men and  $\geq$  80 cm in women [154]. Sedentary lifestyle was defined with respect to  
29  
30 occupation [10]. Family history of diabetes mellitus was defined as diabetes in first-  
31  
32 degree relatives. Alcohol consumption was classified as current consumption or not;  
33  
34 marital status as cohabiting or living alone; ethnic origin as Bantandu, other Bakongo or  
35  
36 others.  
37

### 38 39 **Analyses**

40  
41 Non-responders and responders were compared, as were subjects with complete data and  
42  
43 those who were invited but absent on the second day. Continuous data were expressed as  
44  
45 averages  $\pm$  SD and categorized data as percentages with 95% CI. Comparisons were  
46  
47 made with student t-test, chi-square and ANOVA. A test was considered significant when  
48  
49  $P < 0.05$ . Crude and age-standardised prevalence for subjects aged  $\geq$  20 years were  
50  
51 calculated using both the standard population of Doll et al. and UN 2008 population  
52  
53 database projections [165-176]. Analyses were stratified by gender. SPSS 16 was used.  
54

1  
2  
3  
4  
5  
6  
7  
8  
9 To study risk markers associated with diabetes and IH, backward stepwise multivariate  
10 logistic regression analyses were used. Family history of diabetes, age by group (<50, 50-  
11 69  $\geq$  70 years), gender, marital status, ethnic origin, level of education, physical activity,  
12 alcohol consumption, and either obesity or abdominal obesity, and all interactions with  
13 family history were included in the initial model. ROC analysis compared performance of  
14 BMI and waist size to predict diabetes risk.  
15  
16  
17  
18  
19  
20  
21  
22  
23  
24  
25  
26  
27  
28  
29  
30  
31  
32  
33  
34  
35  
36  
37  
38  
39  
40  
41  
42  
43  
44  
45  
46  
47  
48  
49  
50  
51  
52  
53  
54  
55  
56  
57  
58  
59  
60

## RESULTS

### Study population

The sample consisted of 2025 selected subjects. Response rate was 93.7% (1898/2025). Complete data were available in 1759 subjects (86.9%), as 2 subjects were aged < 20 years, FPG was not available in 30 subjects on day one, and 107 did not repeat tests on day two (Figure 1).

### Characteristics of participants

Average age of 1759 subjects with complete data was  $51.5 \pm 16.4$  years, and 960 (54.6%) were aged > 50 years. Women represented 64.1% (n=1128;  $P < 0.001$ ) of subjects. Mean BMI and waist circumference were  $21.7 \pm 4.6$  kg/m<sup>2</sup> and  $79.1 \pm 12.7$  cm, respectively.

Both BMI and waist size were higher in women ( $P < 0.001$  for both; Table 1). Obesity was found in 6.4%, and more prevalent in women (8.6% vs. 2.6%). Among subjects with BMI < 25 kg/m<sup>2</sup>, 2.9% of men and 27.0% of women had abdominal obesity. Hypertension prevalence was 9.8%.

Most participants (n=1078; 61.3%) were of Bantandu ethnicity, and 82.3% had a secondary education level (n=1448). Many participants were farmers or animal breeders (49.1%; n=864), yet only 31.4% (n=553) walked  $\geq$  one hour every day.

Incomplete censuses and the absence of key demographic data in the Kisantu area have precluded comparison of study participant characteristics with those in the general population.

### Characteristics of non-responders and second day absentees

Non-responders (n=107) were younger than responders ( $39.6 \pm 12.0$  vs.  $51.5 \pm 16.4$  years;  $P < 0.001$ ), and were more frequently male (53.2 vs. 35.9%;  $P < 0.001$ ). Age, gender, BMI, waist size, systolic and diastolic blood pressure were not significantly different in second day absentees and in participants with complete data. First day FPG was, as expected, significantly higher in second day absentees ( $6.1 \pm 0.5$  vs.  $5.3 \pm 1.9$  mmol/l;  $P < 0.05$ ).

### Prevalence of diabetes mellitus

Crude prevalence of diabetes mellitus was 4.8% (95% CI 3.9-5.9; n=85) (Table 1): men 5.5% (95% CI 3.9-7.6); women 4.4% (95% CI 3.3-5.8). Standardised prevalence was 4.2% and 4.0% according to Doll et al and UN world population prospects, respectively.

People with previously diagnosed diabetes represented 3.4% (n=59) of all subjects, and 69.4% of diabetes cases. Use of oGTT added only a single case of newly diagnosed diabetes. All other newly diagnosed cases were, therefore, detected using FPG. Highest diabetes prevalence was observed in the 50-69 age group (n=49).

### Prevalence of intermediate hyperglycaemia

According to WHO/IDF criteria, crude prevalence of IFG, IGT and IH was 4.7% (n=82), 1.1% (n=20), and 5.8% (95% CI 4.8-7.0; n=102), respectively. IH was observed in 4.6% of men and 6.5% of women (Table 1). IH was frequently observed in younger age groups: n=40 (6.4%) in age group 30-49 vs. n=33 (4.6%) in age group 50-69.

1  
2  
3  
4  
5  
6 According to ADA 2003 criteria, IH prevalence was 14.2% (95% CI 12.6-15.8; n=250):  
7  
8 men 12.0%; women 15.4%. IFG was present in 12.6% (n=221) of subjects, and IGT in  
9  
10 1.6% (n=29).  
11

12  
13  
14 Standardised IH prevalence according to Doll et al. was 5.5% (WHO/IDF criteria) and  
15  
16 13.8% (ADA criteria). According to UN world population prospects, it was 5.7%  
17  
18 (WHO/IDF) (men 3.9%; women 6.6%) and 13.7% (ADA) (men 12.6%; women 15.4%).  
19

### 20 21 22 **Prevalence of disorders of glycaemia**

23  
24 According to WHO/IDF criteria 10.6% (95% CI 9.2-12.1) of study participants had a  
25  
26 disorder of glycaemia, i.e. diabetes plus IH (men 10.1%; women 10.8%). Based on ADA  
27  
28 criteria disorders of glycaemia were observed in 19.0% of subjects (95% CI 17.2-20.9;  
29  
30 men 17.5%; women 19.8%). The proportion of disorders of glycaemia made up by IH  
31  
32 was 54.7% and 74.7% according to WDF/IDF and ADA criteria, respectively.  
33

### 34 35 36 **Bivariate analysis of risk markers**

37  
38 Age was not significantly different in subjects with diabetes, IH or normoglycaemia.  
39  
40 Increasing degrees of glucose intolerance were associated with higher BMI values in both  
41  
42 sexes, although average BMI values were within the normal range in all categories.  
43  
44 Higher waist circumferences were observed in both sexes in subjects with diabetes and  
45  
46 IH. Similarly, systolic and diastolic blood pressure was increased in subjects with IH or  
47  
48 diabetes (*Table 1*).  
49

50  
51 Current alcohol use was less prevalent in subjects with diabetes or IH compared to  
52  
53 normoglycaemic people ( $P < 0.05$ ). Family history of diabetes (%) was higher in people  
54

1  
2  
3  
4  
5  
6 with diabetes (36.5%) than in IH (12.7%) and normoglycaemics (8.2%,  $P < 0.001$ ). No  
7  
8 statistical differences were observed between the three groups in terms of marital status,  
9  
10 ethnicity and level of education or occupation.  
11

### 12 13 14 **Multivariate analyses of risk markers**

15  
16 Independent risk markers for diabetes were: male gender (OR 2.5; 95% CI 1.4-4.2); age  
17  
18 50-69 years (OR 2.6; 95% CI 1.5-4.3); family history of diabetes (OR 3.5; 95% CI 1.8-  
19  
20 6.8); and waist circumference (OR 4.1; 95% CI 2.5-6.8). If family history was negative,  
21  
22 alcohol consumption was protective (OR 0.4; 95% CI 0.2-0.7). If family history was  
23  
24 positive, alcohol consumption was a risk marker (OR=3.8; 95% CI 1.4-10.7). P for  
25  
26 interaction: 0.01.  
27

28  
29 A similar model that compared IH according to WHO/IDF criteria with normal people  
30  
31 resulted in only one risk marker: obesity (OR 2.6; 95% CI 1.4-4.6). IH defined according  
32  
33 to ADA was associated with waist circumference (OR 1.4; 95% CI 1.1-1.9); and primary  
34  
35 education level (OR 1.6; 95% CI 1.1-2.6). Moderate physical activity was protective.  
36  
37 BMI predicted IH (OR 0.7; 95% CI 0.5-0.9) when it replaced waist circumference in the  
38  
39 model.  
40  
41

### 42 43 **ROC analysis**

44  
45 In ROC analysis waist circumference (AUC 0.68; 95% CI 0.62-0.74) predicted diabetes  
46  
47 slightly better than BMI (AUC 0.61; 95% CI 0.54-0.68). Difference in AUC was 0.08;  
48  
49 95% CI 0.03-0.11.  
50  
51  
52  
53  
54  
55

## DISCUSSION

This analytical cross-sectional survey with a participation rate of 87% proves that prevalence studies on NCDs are feasible, even in a Central African country which is one of the poorest countries in the world.

Crude prevalence of diabetes in adults in this study (4.8%) is higher than 2009 IDF estimates for DRC (2.6% for crude national prevalence; 3.2% prevalence adjusted to world population), and already exceeds 2030 IDF projections (3.2-4.4%) [3-4]. The present data from DRC are however largely in line with recent results from other countries in the region [3, 9, 17, 18] and from the Kivu region [19]. Standardised prevalence in our study is slightly lower than crude prevalence (4.0-4.2% vs. 4.8%). Other countries in SSA show similar results [3].

The crude prevalence of the present survey may have been influenced by the structure of the study sample that contained relatively few individuals aged < 50 years in whom diabetes tends to be less prevalent. In the present study, people aged < 20 years have been excluded, meaning that our population structure was truncated. The under-representation of young adult men in our study is not unique in SSA: women represented 52, 58, 62, and even 79% of study participants in previous studies [19-21, 20-22]. This may, in part, be due to young men migrating to larger cities or mining areas for economic reasons. As agricultural activities are the main occupation of the Kisantu population, some men may also have preferred to go out to work in the fields. As young men tend to be less obese, this under-representation may influence the crude – but not the standardised- prevalence rate of diabetes and IH.

Contrary to most other studies in SSA, newly detected diabetes was low (31%) in our study. Except in urban South Africa and in one study in rural Sudan, fewer than 50% of

1  
2  
3  
4  
5  
6  
7 participants in previous surveys knew they had diabetes [5]. This may reflect effects of  
8  
9 repeated diabetes awareness campaigns and level of diabetes care in Kisantu.

10  
11  
12 Crude prevalence of IH in the present survey (5.8% and 14.2% according to WHO/IDF or  
13  
14 ADA criteria, respectively) reflects mainly the proportion of subjects with IFG. The  
15  
16 lower glucose threshold used by ADA almost triples IFG prevalence compared to  
17  
18 WHO/IDF criteria, as was previously observed in surveys in Denmark, India and the  
19  
20 USA [14]. As a consequence, disorders of glycaemia, i.e. diabetes plus IH, according to  
21  
22 ADA criteria are observed in 19.0% of the semi-rural adult population of Kisantu.  
23  
24 Together with the high proportion of disorders of glycaemia made up by IH (54.7% and  
25  
26 74.7% according to WHO/IDF and ADA, respectively), these data suggest the early  
27  
28 stages of a diabetes epidemic in DRC, probably more in urban than in rural communities  
29  
30 [19]. It is noteworthy that these observations are made in people with normal average  
31  
32 BMI values, according to Caucasian criteria, a finding that also has been reported  
33  
34 elsewhere in SSA [19].

35  
36  
37 A cross-sectional study cannot prove a cause and effect relationship between risk markers  
38  
39 and disease, only an association. However, combining statistical association and clinical  
40  
41 reasoning may provide an indication of such an effect, even in the absence of a  
42  
43 longitudinal study. Here, we use the term risk marker for a variable with both a  
44  
45 significant independent association with diabetes and a clinical suggestion about the  
46  
47 direction of this association. Independent risk markers for diabetes observed in this  
48  
49 survey are similar to those identified elsewhere in SSA: male gender, age 50-59 years,  
50  
51 family history, and waist circumference. BMI and waist circumference were risk markers  
52  
53 for IH, while moderate physical activity level was a protective factor. The latter  
54  
55



1  
2  
3  
4  
5  
6  
7 observation supports the conclusions of a recent study in Cameroon [232]: modest  
8 population-based changes in physical activity may have significant benefits in terms of  
9  
10 reducing the emerging burden of metabolic diseases.

11 We identified a percentage of known diabetes which is higher than found elsewhere [24].  
12 This may result from a well organised diabetes program including awareness campaigns  
13 in the past. Of course this does not influence the prevalence rates we report.  
14  
15  
16  
17  
18  
19

20  
21 Main challenges for this study were the absence of reliable census data and trained field  
22 workers, the difficulty of motivating the population, and performing biochemical tests  
23 using low-cost, robust and simple technology. As in similar situations elsewhere, we had  
24  
25 to rely on cluster sampling [23-24,25-26]. Basic principles of the WHO STEPwise  
26  
27 method were followed [253], but we added repeat FPG testing or 2-hour post-load  
28  
29 glucose in pre-specified subgroups. This is consistent with WHO/IDF and ADA  
30  
31 recommendations to enhance chances of detecting diabetes cases and differentiate  
32  
33 between IFG and IGT [132-143, 275]. As 2-h post-load glucose was carried out in only a  
34  
35 subset of participants, prevalence of diabetes and IGT may have been underestimated.  
36  
37 However, most characteristics are perfectly comparable between attenders and non-  
38  
39 attenders, but non-attenders tended to be younger - and therefore related to even less  
40  
41 diabetes risk compared to attenders – and mostly males, unable to attend because they  
42  
43 were working in the fields or far from their home town – and therefore unlikely to have  
44  
45 an undetected diabetes. If none of the non-attenders would have diabetes, the prevalence  
46  
47 would decrease from 4.8% to 4.6%, what in our view has little relevance. We therefore  
48  
49 have no reason to expect any important difference between diabetes prevalence in second  
50  
51 day attenders and non-attenders.  
52  
53  
54  
55  
56  
57  
58  
59  
60

1  
2  
3  
4  
5  
6  
7  
8  
9  
10  
11  
12  
13  
14  
15  
16  
17  
18  
19  
20  
21  
22  
23  
24  
25  
26  
27  
28  
29  
30  
31  
32  
33  
34  
35  
36  
37  
38  
39  
40  
41  
42  
43  
44  
45  
46  
47  
48  
49  
50  
51  
52  
53  
54  
55  
56  
57  
58  
59  
60

Capillary blood glucose was measured because it is easier and less expensive than venous tests. Also, WHO and IDF recognise in under-resourced countries the difficulty of carrying out biochemical tests, unless low-cost technology is used [143, 253, 286].

We did not perform a validation study of these tests ourselves. However, according to a recent WHO/IDF report [14], fasting values of both methods are identical. Only postprandial values may differ (recommendation 5). With this device, there is no influence of hematocrite on glucose values within the normoglycaemia range, which is important in screening situations as during our study. [29]. The Glucocard X reports plasma glucose values. Testing showed that reproducibility is good, the device is robust, easy to use and without need of extensive training [12]. Additionally, according to the above mentioned WHO/IDF report, separation of plasma within minutes after sampling is required to obtain correct values when sampling venous blood. Even sampling in a container with NaF is not sufficient. Systematic separation would be totally impossible in rural RDC.

We have little information about the characteristics of the non-responders. Another weakness is that we were unable to compare our study sample with the general population due to the lack of an official population census map.

Strengths of our study are the large number of study participants and the high participation rate. This was obtained through visiting non-responders at home after each day of the survey [10], a high level of awareness and strong involvement of community members (health zone, local leaders, churches).

The high prevalence of diabetes mellitus in this rural town, and the even higher prevalence of IDF suggest a large burden of the disease in ~~rural Congo~~the region and let

1  
2  
3  
4  
5  
6  
7  
8  
9  
10  
11  
12  
13  
14  
15  
16  
17  
18  
19  
20  
21  
22  
23  
24  
25  
26  
27  
28  
29  
30  
31  
32  
33  
34  
35  
36  
37  
38  
39  
40  
41  
42  
43  
44  
45  
46  
47  
48  
49  
50  
51  
52  
53  
54  
55  
56  
57  
58  
59  
60

us expect even larger numbers in the future. [This indicates a real challenge for the Congolese National diabetes plan.](#)

For peer review only

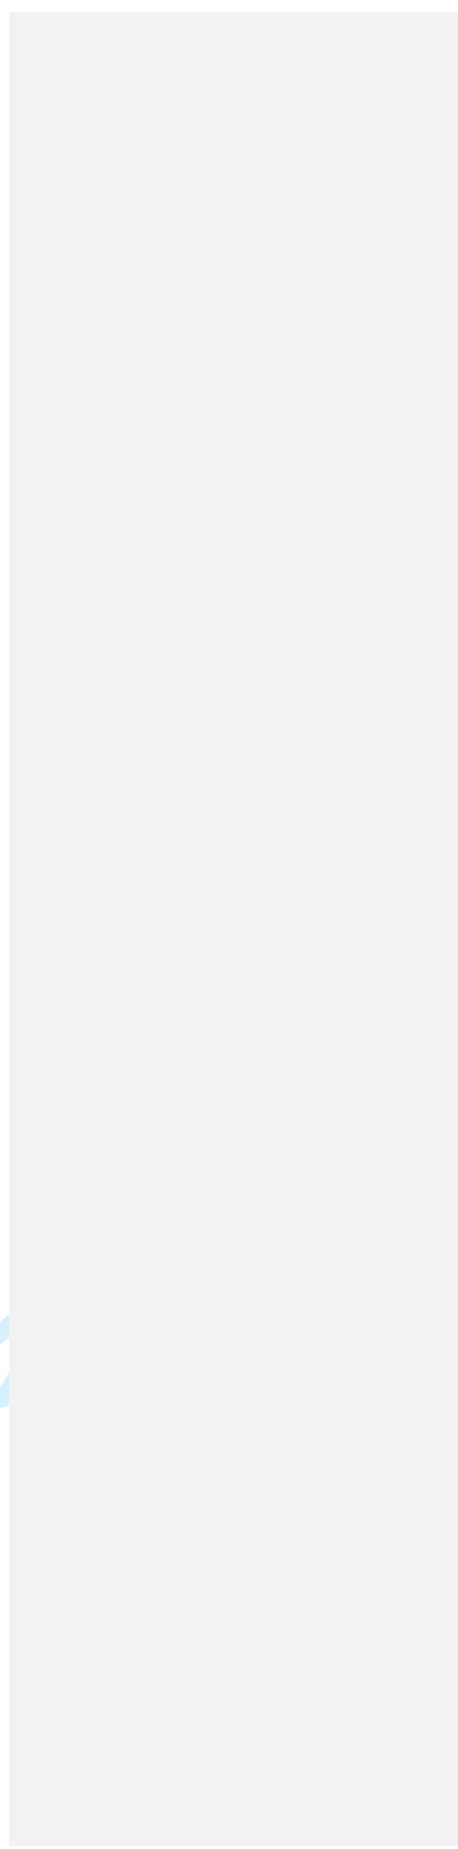

## Acknowledgements

The authors thank Okitolonda Wemakoy, Kiloka Nyandwe and Prince Kimpanga of Kinshasa University, School of Public Health, DRC; Mangani Nseka of Kinshasa University, Teaching Hospital; Marina Devis and Carla Truyers of the Department of General Practice, Catholic University Leuven; and Geert Molenberghs of the Department of Biostatistics.

We also acknowledge the field workers Baka Mampuya, Bungudi Edo, Gitambala Jérémie, Kapambu Laetitia, Kimbeni Fifi, Kuzungulu Bibiche, Luntadila Anita, Mafuta Mamie, Makengo Ange, Makiese Brigitte, Mamingila Richard, Matenda Anita, Mbombo Alpha, Mfutila Espérance, Ndengila Pitchouna, Ngiambila Zimbote, Nseka Baron, Nsiala Floribert, Nsoma Malou, and Sanga Pélagie.

**Declaration of Competing Interests:** Nothing to declare

## References

1. Dalal S, Beunza JJ, Volmink J, Adebamowo C, Bajunirwe F, Njelekela M et al. Non-communicable diseases in sub-Saharan Africa: what we know now. *Int J Epidemiol* 2011; 1-17 doi:10.1093/ije/dyr050.
2. Levitt NS. Diabetes in Africa: epidemiology, management and healthcare challenges. *Heart* 2008; **94**: 1376-1382.
3. IDF. Diabetes Atlas 4<sup>th</sup> edn. Brussels, Belgium: International Diabetes Federation 2009.
4. Shaw JE, Sicree RA, Zimmet PZ. Global estimates of the prevalence of diabetes for 2010 and 2030. *Diabetes Res Clin Pract* 2010; **87**: 4-14.
5. Mbanya JC, Motala AA, Sobngwi E, Assah FK, Enoru ST. Diabetes in sub-Saharan Africa. *Lancet* 2010; **375**: 2254-2266.
6. Gill GV, Mbanya JC, Ramaiya KL, Tesfaye S. A sub-Saharan African perspective of diabetes. *Diabetologia* 2009; **52**: 8-16.
7. McLarty DG, Swai AB, Kitange HM, Masuki G, Mtinangi BL, Kilima PM et al. Prevalence of diabetes and impaired glucose tolerance in rural Tanzania. *Lancet* 1989; **1**: 871-875.
8. Aspray TJ, Mugusi F, Rashid S, Whiting D, Edwards R, Alberti KG et al. Rural and urban differences in diabetes prevalence in Tanzania: the role of obesity, physical inactivity and urban living. *Trans R Soc Trop Med Hyg* 2000; **94**: 637-644.
9. Muyer MT, Muls E, Mapatano MA, Bieleli EO, Okitolonda W. Le diabète sucré en Afrique sub-Saharienne, une revue systématique de la littérature [Diabetes mellitus in sub-Saharan Africa, a systematic review of the literature]. *Louvain Médical* 2008; **127**: 153-165.

- 1  
2  
3  
4  
5  
6  
7  
8  
9  
10  
11  
12  
13  
14  
15  
16  
17  
18  
19  
20  
21  
22  
23  
24  
25  
26  
27  
28  
29  
30  
31  
32  
33  
34  
35  
36  
37  
38  
39  
40  
41  
42  
43  
44  
45  
46  
47  
48  
49  
50  
51  
52  
53  
54  
55  
56  
57  
58  
59  
60
10. Muyer MT, Muls E, Mapatano MA, Makulo R, Mvitu M, Kimenyembo W et al. Estimating prevalence of diabetes in a Congolese town was feasible. *J Clin Epidemiol* 2011; **64**: 172-181.
11. Kimfuta J. Rapport annuel du Bureau Central de la Zone de Santé de Kisantu [Annual report of the central office of the health zone of Kisantu] 2005.
12. American Diabetes Association. Follow-up report on the diagnosis of diabetes mellitus. *Diabetes Care* 2003; **26**: 3160-3167.
13. SKUP. Glucocard X-meter, Glucocard X-sensor: report from an evaluation organised by SKUP. Scandinavian evaluation of laboratory equipment for primary health care. University of Bergen, Bergen: 2006.
- ~~12.~~ —
- ~~13,14.~~ World Health Organization. Definition and diagnosis of diabetes mellitus and intermediate hyperglycemia. Report of a WHO/IDF consultation. Geneva: WHO 2006.
- ~~14,15.~~ Alberti KG, Zimmet P, Shaw J. Metabolic syndrome – a new worldwide definition. A consensus statement from the International Diabetes Federation. *Diabet Med* 2006; **23**: 469-480.
- ~~15,16.~~ Doll R, Waterhouse J, Muir C, Parkin D, Whelan S, Ferlay I et al. Cancer incidence in five continents: a technical report. Geneva, Lyon: International Union against Cancer, International Agency for Research on Cancer 1966.
- ~~16,17.~~ United Nations. Dept of Economic and Social Affairs. Population Division. World Population Prospects. The 2008 Revision Population Database. Geneva: United Nations 2008.

Formatted: No bullets or numbering

- 1  
2  
3  
4  
5  
6  
7 [18.](#) Hwnag CK, Han PV, Zabetian A, Ali MK, Narayan KMV. Rural diabetes prevalence  
8 quintuples over twenty-five years in low- and middle-income countries: a systematic  
9 review and meta-analysis. *Diab Res Clin Pract* 2012; 96: 271-285.
- 10  
11  
12 ~~17-19.~~ [Katchunga P, Masumbuko B, Belma M, KashongweMunogolo Z, Hermans MP,](#)  
13 [M'buyamba-Kabungu JR. Age and living in an urban environment are major](#)  
14 [determinants of diabetes among South Kivu Congolese adults. \*Diabetes Metab\* 2012;](#)  
15 [38\(4\): 324-31.](#)
- 16  
17  
18 ~~18.~~ [Baldé NM, Diallo I, Baldé MD, Barry LS, Kaba L, Diallo MM et al. Diabetes and](#)  
19 [impaired fasting glucose in rural and urban populations in Futa Jallon \(Guinea\):](#)  
20 [prevalence and associated risk factors. \*Diabetes Metab\* 2007; 33: 114-120.](#)
- 21  
22  
23  
24  
25  
26 ~~19-20.~~ Omar M, Seedat M, Motala A, Dyer R, Becker P. The prevalence of diabetes  
27 mellitus and impaired glucose tolerance in a group of urban South African blacks. *S*  
28 *Afr Med J* 1993; 83: 641-643.
- 29  
30  
31  
32 ~~20-21.~~ Levitt NS, Katzenellenbogen JM, Bradshaw D, Hoffman MN, Bonnici F. The  
33 prevalence and identification of risk factors for NIDDM in urban Africans in Cape  
34 Town, South Africa. *Diabetes Care* 1993; 16: 601-607.
- 35  
36  
37  
38 ~~21-22.~~ Motala A, Esterhuizen T, Gouws E, Pirie F, Omar M. Diabetes and other  
39 disorders of glycemia in a rural South African community: prevalence and associated  
40 risk factors. *Diabetes Care* 2008; 31: 1783-1788.
- 41  
42  
43  
44 [23.](#) Assah FK, Ekelund U, Brage S, JC Mbanya, Wareham NJ. Urbanization, physical  
45 activity, and metabolic health in sub-Saharan Africa. *Diabetes Care* 2011; 34: 491-  
46 496.
- 47  
48  
49  
50 ~~22-24.~~ [Peer N, Steyn K, Lombard C, Lambert EV, Vythillingum B, Levitt NS. Rising](#)  
51 [diabetes prevalence among urban-dwelling black South-Africans. \*PLoSOne\* 7\(9\):](#)  
52 [e43336.](#)
- 53  
54  
55  
56  
57  
58  
59  
60

1  
2  
3  
4  
5  
6  
7 23-25. Bonita R, deCourten M, Dwyer T, Jamrosik K, Winkelmann R. Summary.

8 Monitoring of risk factors for non-communicable diseases: the WHO STEPwise  
9 approach. Geneva, Switzerland: World Health Organization 2001.  
10  
11

12 24-26. Herold J. Surveys and sampling. In: Gregg M. ed, Field epidemiology. Oxford,  
13 UK: Oxford University Press 2008..  
14

15  
16 25-27. American Diabetes Association. Position statement. Diagnosis and classification  
17 of diabetes mellitus. Diabetes Care 2011; **34** (Suppl 1): S62-69.  
18  
19

20 28. IDF, Diabetes Atlas 3th edn. Brussels, Belgium: International Diabetes federation  
21 2006.  
22

23  
24 ~~26-Arens S, Moons V, Meuleman P, Struyf F, Zaman Z. Evaluation of Glucocard~~  
25 ~~Memory 2 and Acctrend sensor blood glucose meters. Clin Chem Lab Med 1998;~~  
26 ~~36(1): 47-52.~~  
27  
28  
29

Formatted: English (U.S.)

Formatted: English (U.S.)



Table 1 Clinical characteristics and crude prevalence of diabetes, intermediate hyperglycaemia or normoglycaemia according to WHO/IDF 2006 criteria [13] or ADA 2003 criteria [12] of 1759 adults in Kisantu, DR Congo.

1  
2  
3  
4  
5  
6  
7  
8  
9  
10  
11  
12  
13  
14  
15  
16  
17  
18  
19  
20  
21  
22  
23  
24  
25  
26  
27  
28  
29  
30  
31  
32  
33  
34  
35  
36  
37  
38  
39  
40  
41  
42  
43  
44  
45  
46  
47  
48  
49

|                          | WHO / IDF    |              |                             |              |          | ADA          |                             |              |          |
|--------------------------|--------------|--------------|-----------------------------|--------------|----------|--------------|-----------------------------|--------------|----------|
|                          | All          | Diabetes     | Intermediate Hyperglycaemia | Normal       | P-value* | Diabetes     | Intermediate Hyperglycaemia | Normal       | P-value* |
| <i>n</i>                 | 1759         | 85           | 102                         | 1572         |          | 85           | 250                         | 1424         |          |
| Prevalence               |              | 4.8 %        | 5.8 %                       | 89.4 %       |          | 4.8 %        | 14.2 %                      | 81.0 %       |          |
| 95% CI                   |              | 3.8-5.9      | 4.8-7.0                     | 87.9-90.8    |          | 3.8-5.9      | 12.6-15.8                   | 79.1-82.8    |          |
| Men ( <i>n</i> =631)     |              | 5.5 %        | 4.6 %                       | 89.9 %       |          | 5.5 %        | 12.0 %                      | 82.4 %       |          |
| Women ( <i>n</i> =1128)  |              | 4.4 %        | 6.5 %                       | 89.1 %       |          | 4.4 %        | 15.4 %                      | 80.2 %       |          |
| Age (years)              |              |              |                             |              |          |              |                             |              |          |
| Men                      | 53.0 ± 17.0  | 56.6 ± 15.2  | 56.0 ± 15.9                 | 52.6 ± 17.2  | 0.26     | 56.6 ± 15.2  | 52.5 ± 15.7                 | 52.9 ± 17.3  | 0.40     |
| Women                    | 50.7 ± 16.0  | 55.2 ± 15.2  | 50.0 ± 16.3                 | 50.5 ± 16.0  | 0.13     | 55.2 ± 15.2  | 50.9 ± 14.9                 | 50.4 ± 16.2  | 0.12     |
| BMI (kg/m <sup>2</sup> ) |              |              |                             |              |          |              |                             |              |          |
| Men                      | 20.6 ± 3.5   | 21.7 ± 4.7   | 21.5 ± 4.4                  | 20.5 ± 3.4   | 0.06     | 21.7 ± 4.6   | 21.6 ± 4.2                  | 20.4 ± 3.3   | 0.03     |
| Women                    | 22.3 ± 4.9   | 24.8 ± 5.7   | 23.1 ± 5.6                  | 22.1 ± 4.8   | 0.001    | 24.7 ± 5.7   | 22.8 ± 5.3                  | 22.1 ± 4.8   | 0.001    |
| Waist (cm)               |              |              |                             |              |          |              |                             |              |          |
| Men                      | 77.5 ± 11.0  | 84.4 ± 14.2  | 80.5 ± 13.5                 | 76.9 ± 10.5  | 0.001    | 84.4 ± 14.3  | 80.7 ± 13.3                 | 76.5 ± 0.1   | 0.001    |
| Women                    | 80.1 ± 13.5  | 88.5 ± 13.7  | 81.4 ± 13.2                 | 79.5 ± 13.3  | 0.001    | 88.5 ± 13.8  | 80.5 ± 13.0                 | 79.5 ± 13.4  | 0.0001   |
| Blood pressure (mmHg)    |              |              |                             |              |          |              |                             |              |          |
| Systolic                 |              |              |                             |              |          |              |                             |              |          |
| Men                      | 124.4 ± 24.1 | 131.9 ± 25.0 | 130.5 ± 19.0                | 123.6 ± 21.3 | 0.03     | 131.9 ± 24.6 | 125.2 ± 18.9                | 123.8 ± 21.6 | 0.09     |
| Women                    | 119.2 ± 22.3 | 133.1 ± 28.4 | 126.2 ± 21.2                | 120.1 ± 21.0 | 0.001    | 133.9 ± 30.9 | 124.4 ± 22.9                | 117.4 ± 21.2 | 0.001    |
| Diastolic                |              |              |                             |              |          |              |                             |              |          |
| Men                      | 76.9 ± 12.4  | 81.2 ± 12.7  | 80.7 ± 12.3                 | 76.4 ± 12.3  | 0.02     | 81.2 ± 12.7  | 77.1 ± 13.0                 | 76.5 ± 12.3  | 0.09     |
| Women                    | 73.9 ± 12.4  | 80.7 ± 13.3  | 77.9 ± 12.6                 | 74.5 ± 12.3  | 0.001    | 80.4 ± 13.8  | 75.9 ± 12.1                 | 73.2 ± 12.2  | 0.001    |
| Glycaemia (mmol/l)       |              |              |                             |              |          |              |                             |              |          |
| Men                      | 5.4 ± 2.5    | 12.6 ± 7.2   | 6.4 ± 0.6                   | 4.9 ± 0.5    | 0.001    | 12.6 ± 7.2   | 6.0 ± 0.5                   | 4.8 ± 0.5    | 0.001    |
| Women                    | 5.2 ± 1.5    | 9.9 ± 4.6    | 6.5 ± 0.4                   | 5.0 ± 0.5    | 0.001    | 9.9 ± 4.6    | 6.1 ± 0.5                   | 4.8 ± 0.5    | 0.001    |

\*: p –values relate to the degree of significance when comparing the means between diabetes, IH and normal and are based on ANOVA analysis

Flowchart: Participants in the Kisantu Diabetes Prevalence study

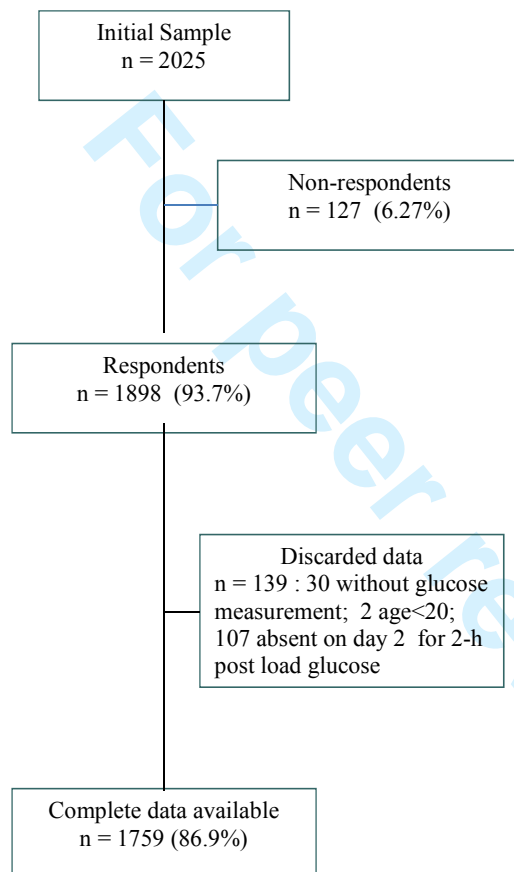

STROBE Statement—Checklist of items that should be included in reports of *cross-sectional studies*

|                              | Item No | Recommendation                                                                                                                                                                                                                                                                                                                                                        |
|------------------------------|---------|-----------------------------------------------------------------------------------------------------------------------------------------------------------------------------------------------------------------------------------------------------------------------------------------------------------------------------------------------------------------------|
| <b>Title and abstract</b>    | 1       | (a) Indicate the study's design with a commonly used term in the title or the abstract<br>(b) Provide in the abstract an informative and balanced summary of what was done and what was found (a) title (b) abstract                                                                                                                                                  |
| <b>Introduction</b>          |         |                                                                                                                                                                                                                                                                                                                                                                       |
| Background/rationale         | 2       | Explain the scientific background and rationale for the investigation being reported (introduction)                                                                                                                                                                                                                                                                   |
| Objectives                   | 3       | State specific objectives, including any prespecified hypotheses (introduction: last §)                                                                                                                                                                                                                                                                               |
| <b>Methods</b>               |         |                                                                                                                                                                                                                                                                                                                                                                       |
| Study design                 | 4       | Present key elements of study design early in the paper (Methods 1°§)                                                                                                                                                                                                                                                                                                 |
| Setting                      | 5       | Describe the setting, locations, and relevant dates, including periods of recruitment, exposure, follow-up, and data collection (Methods: location, study populations & sampling procedure)                                                                                                                                                                           |
| Participants                 | 6       | (a) Give the eligibility criteria, and the sources and methods of selection of participants (Methods: study population & sampling procedure)                                                                                                                                                                                                                          |
| Variables                    | 7       | Clearly define all outcomes, exposures, predictors, potential confounders, and effect modifiers. Give diagnostic criteria, if applicable (methods: study procedure, diagnostic criteria)                                                                                                                                                                              |
| Data sources/<br>measurement | 8*      | For each variable of interest, give sources of data and details of methods of assessment (measurement). Describe comparability of assessment methods if there is more than one group (Methods: study, prevalence & diagnostic criteria)                                                                                                                               |
| Bias                         | 9       | Describe any efforts to address potential sources of bias (Methods: study procedure and analysis, standardization)                                                                                                                                                                                                                                                    |
| Study size                   | 10      | Explain how the study size was arrived at (formal sample size calculations)                                                                                                                                                                                                                                                                                           |
| Quantitative variables       | 11      | Explain how quantitative variables were handled in the analyses. If applicable, describe which groupings were chosen and why (Methods/analysis)                                                                                                                                                                                                                       |
| Statistical methods          | 12      | (a) Describe all statistical methods, including those used to control for confounding<br>(b) Describe any methods used to examine subgroups and interactions<br>(c) Explain how missing data were addressed<br>(d) If applicable, describe analytical methods taking account of sampling strategy<br>(e) Describe any sensitivity analyses<br>(a-e): methods/analysis |
| <b>Results</b>               |         |                                                                                                                                                                                                                                                                                                                                                                       |
| Participants                 | 13*     | (a) Report numbers of individuals at each stage of study—eg numbers potentially eligible, examined for eligibility, confirmed eligible, included in the study, completing follow-up, and analysed<br>(b) Give reasons for non-participation at each stage<br>(a+b): Results/ study population & characteristics<br>(c) Consider use of a flow diagram (added)         |
| Descriptive data             | 14*     | (a) Give characteristics of study participants (eg demographic, clinical, social) and information on exposures and potential confounders (Results/ characteristics of participants)<br>(b) Indicate number of participants with missing data for each variable of interest (Methods/ characteristics of responders)                                                   |
| Outcome data                 | 15*     | Report numbers of outcome events or summary measures (Results/ prevalence of                                                                                                                                                                                                                                                                                          |

|                          |    |                                                                                                                                                                                                                                  |
|--------------------------|----|----------------------------------------------------------------------------------------------------------------------------------------------------------------------------------------------------------------------------------|
|                          |    | DM & prevalence of D?)                                                                                                                                                                                                           |
| Main results             | 16 | (a) Give unadjusted estimates and, if applicable, confounder-adjusted estimates and their precision (eg, 95% confidence interval). Make clear which confounders were adjusted for and why they were included (table 1 – results) |
|                          |    | (b) Report category boundaries when continuous variables were categorized N.A.                                                                                                                                                   |
|                          |    | (c) If relevant, consider translating estimates of relative risk into absolute risk for a meaningful time period                                                                                                                 |
| Other analyses           | 17 | Report other analyses done—eg analyses of subgroups and interactions, and sensitivity analyses (results/ ROC analysis)                                                                                                           |
| <b>Discussion</b>        |    |                                                                                                                                                                                                                                  |
| Key results              | 18 | Summarise key results with reference to study objectives (Discussion § 1-3)                                                                                                                                                      |
| Limitations              | 19 | Discuss limitations of the study, taking into account sources of potential bias or imprecision. Discuss both direction and magnitude of any potential bias (Discussion § 5)                                                      |
| Interpretation           | 20 | Give a cautious overall interpretation of results considering objectives, limitations, multiplicity of analyses, results from similar studies, and other relevant evidence (Discussion § 2 & 6)                                  |
| Generalisability         | 21 | Discuss the generalisability (external validity) of the study results (Discussion § 2 & 3)                                                                                                                                       |
| <b>Other information</b> |    |                                                                                                                                                                                                                                  |
| Funding                  | 22 | Give the source of funding and the role of the funders for the present study and, if applicable, for the original study on which the present article is based (Grants reported in the paper on page 3)                           |

\*Give information separately for exposed and unexposed groups.

**Note:** An Explanation and Elaboration article discusses each checklist item and gives methodological background and published examples of transparent reporting. The STROBE checklist is best used in conjunction with this article (freely available on the Web sites of PLoS Medicine at <http://www.plosmedicine.org/>, Annals of Internal Medicine at <http://www.annals.org/>, and Epidemiology at <http://www.epidem.com/>). Information on the STROBE Initiative is available at [www.strobe-statement.org](http://www.strobe-statement.org).

1  
2  
3  
4  
5  
6  
7  
8  
9  
10  
11  
12  
13  
14  
15  
16  
17  
18  
19  
20  
21  
22  
23  
24  
25  
26  
27  
28  
29  
30  
31  
32  
33  
34  
35  
36  
37  
38  
39  
40  
41  
42  
43  
44  
45  
46  
47  
48  
49  
50  
51  
52  
53  
54  
55  
56  
57  
58  
59  
60

Flowchart: Participants in the Kisantu Diabetes Prevalence study

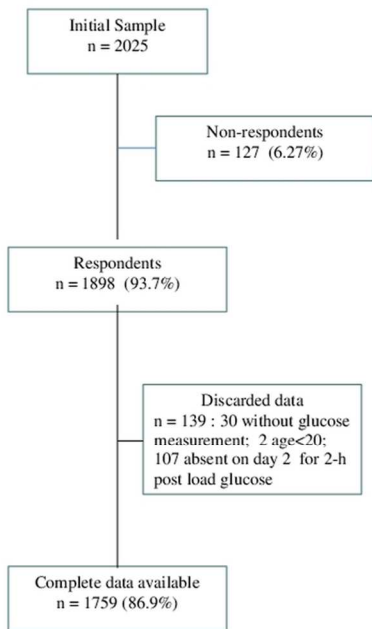

90x127mm (300 x 300 DPI)
